# Supplementary material
Source: JCI journal article supplement (doi:10.1172/jci153877)
Supplement: sd1 [file 1]

**Single-nucleus RNA-sequencing reveals singular gene signatures of human ductal cells  
during adaptation to insulin resistance**

Ercument Dirice<sup>1,2,3,\*</sup>, Giorgio Basile<sup>1,2,\*</sup>, Sevim Kahraman<sup>1,2</sup>, Danielle Diegisser<sup>3</sup>, Jiang Hu<sup>1,2</sup>

Rohit N. Kulkarni<sup>1,2,4</sup>

<sup>1</sup> Islet Cell and Regenerative Biology, Joslin Diabetes Center, Boston, Massachusetts, USA.

<sup>2</sup>Department of Medicine, Beth Israel Deaconess Medical Center, Harvard Medical School,  
Boston, Massachusetts, USA.

<sup>3</sup>Department of Pharmacology, New York Medical College, Valhalla, New York, USA.

<sup>4</sup>Harvard Stem Cell Institute, Boston Massachusetts, USA.

\*, these authors contributed equally.

The authors have declared that no conflict of interest exists.

Correspondence to:

Rohit N. Kulkarni M.D. Ph.D,

Islet Cell and Regenerative Biology, Joslin Diabetes Center

One Joslin Place, Boston, 02215 MA

Tel: +1-617-309-3460 – Fax: +1-617-309-3476

Email: [Rohit.Kulkarni@joslin.harvard.edu](mailto:Rohit.Kulkarni@joslin.harvard.edu)

## Supplemental Material

### Supplemental Figures

#### Supplemental Figure 1

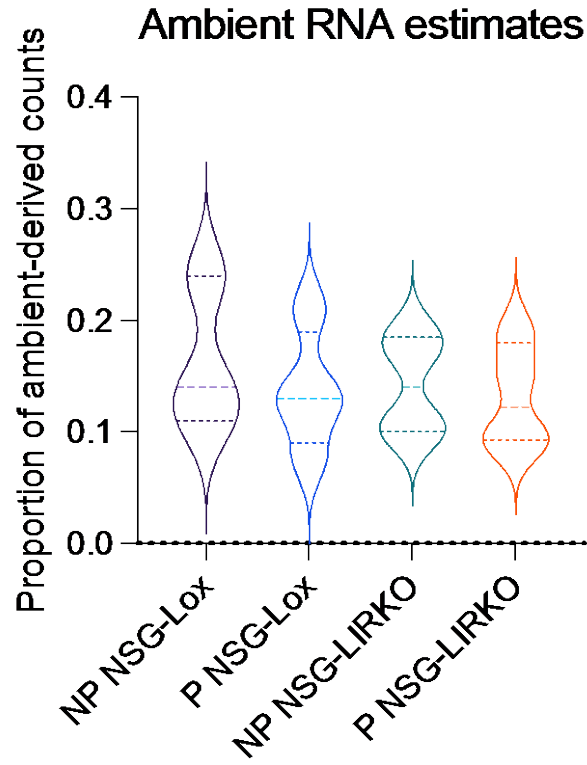

**Supplemental Figure 1: Estimation of ambient RNA levels in human grafts.** Violin plot of the proportions of ambient RNA contamination in droplets from human islets and ductal cells transplanted in non-pregnant NSG-Lox (NP NSG-Lox, purple), pregnant NSG-Lox (P NSG-Lox, blue), non-pregnant NSG-LIRKO (NP NSG-LIRKO), and pregnant NSG-LIRKO (P NSG-LIRKO). N=4/group.

## Supplemental Figure 2

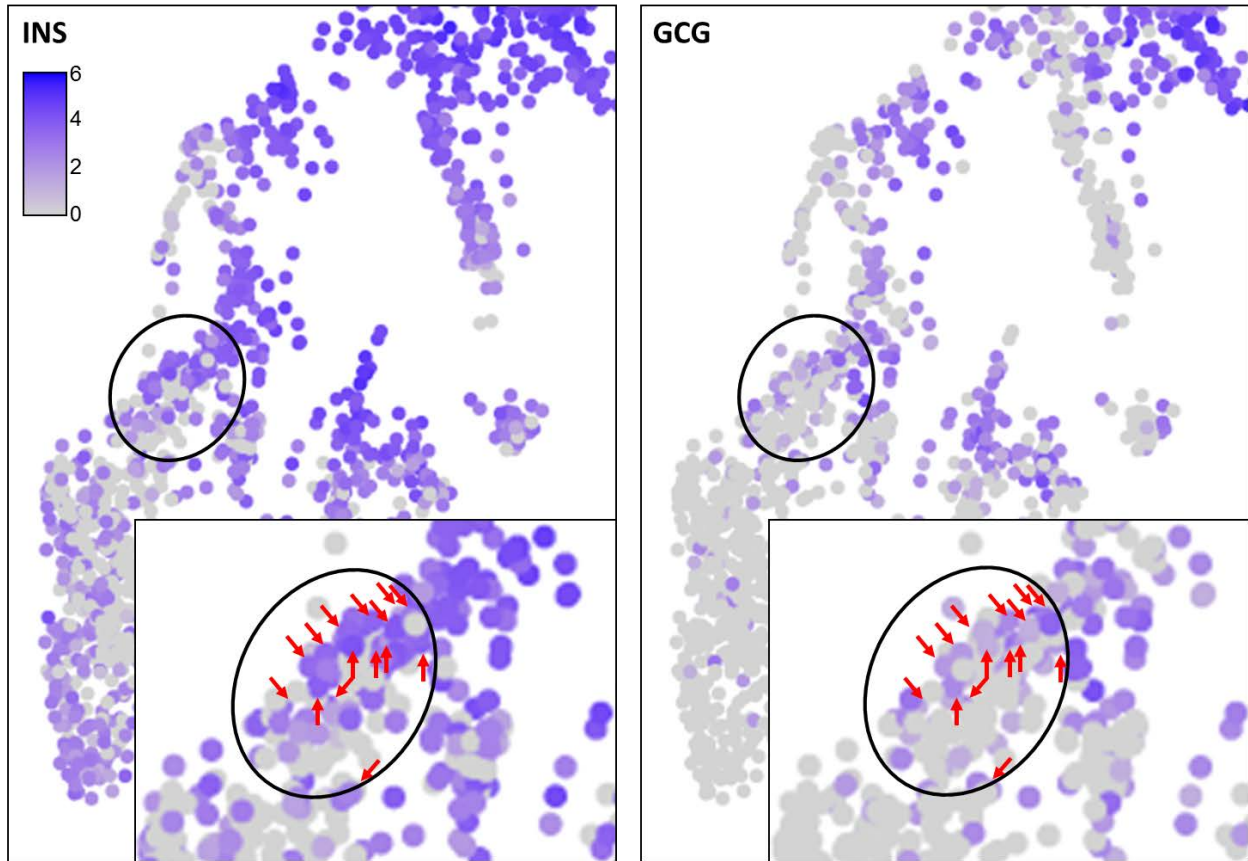

**Supplemental Figure 2: A specific ductal sub-population is enriched in insulin/glucagon double positive nuclei.** Image shows magnified area from Figure 2B (solid circle within the dotted circle). Further magnified area shows red arrows pointing cells that express both insulin and glucagon within the ductal clusters in given UMAPs.

### Supplemental Figure 3

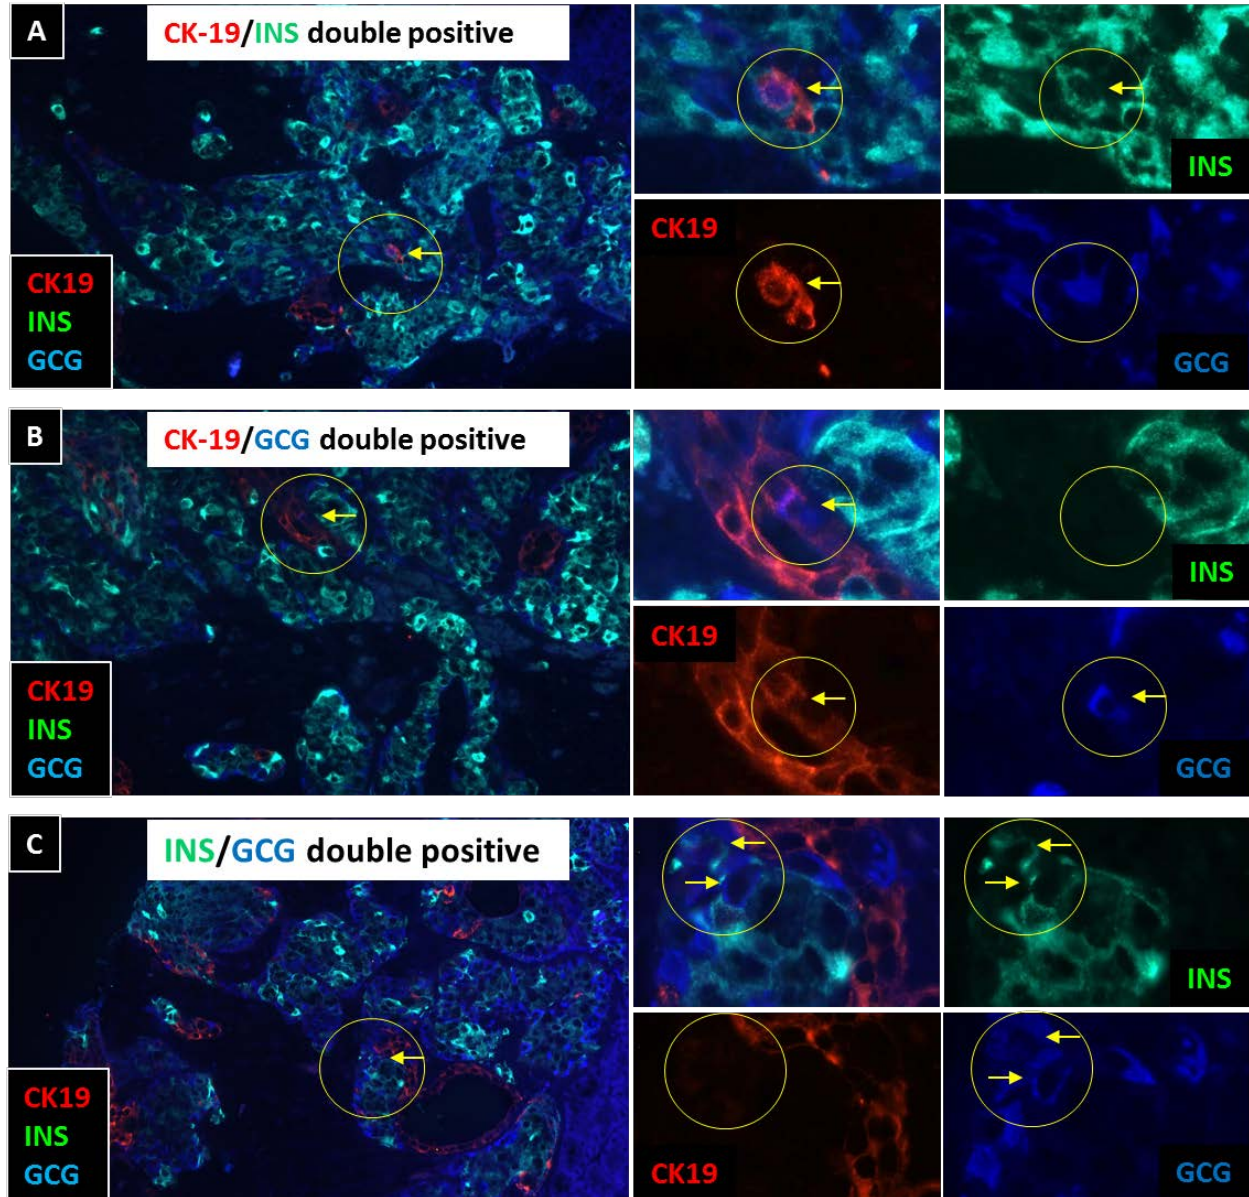

**Supplemental Figure 3: Mature  $\beta$ - and  $\alpha$ -cell markers are co-expressed in human ductal cells.** (A-C) Representative fluorescence images of human islet and duct graft samples immunostained for CK19 (red), insulin (green), and, glucagon (blue) showing (A) CK19/INS, (B) CK19/GCG, and (C) INS/GCG double expressing cells. Yellow circles and arrows show cells expressing both markers.

## Supplemental Figure 4

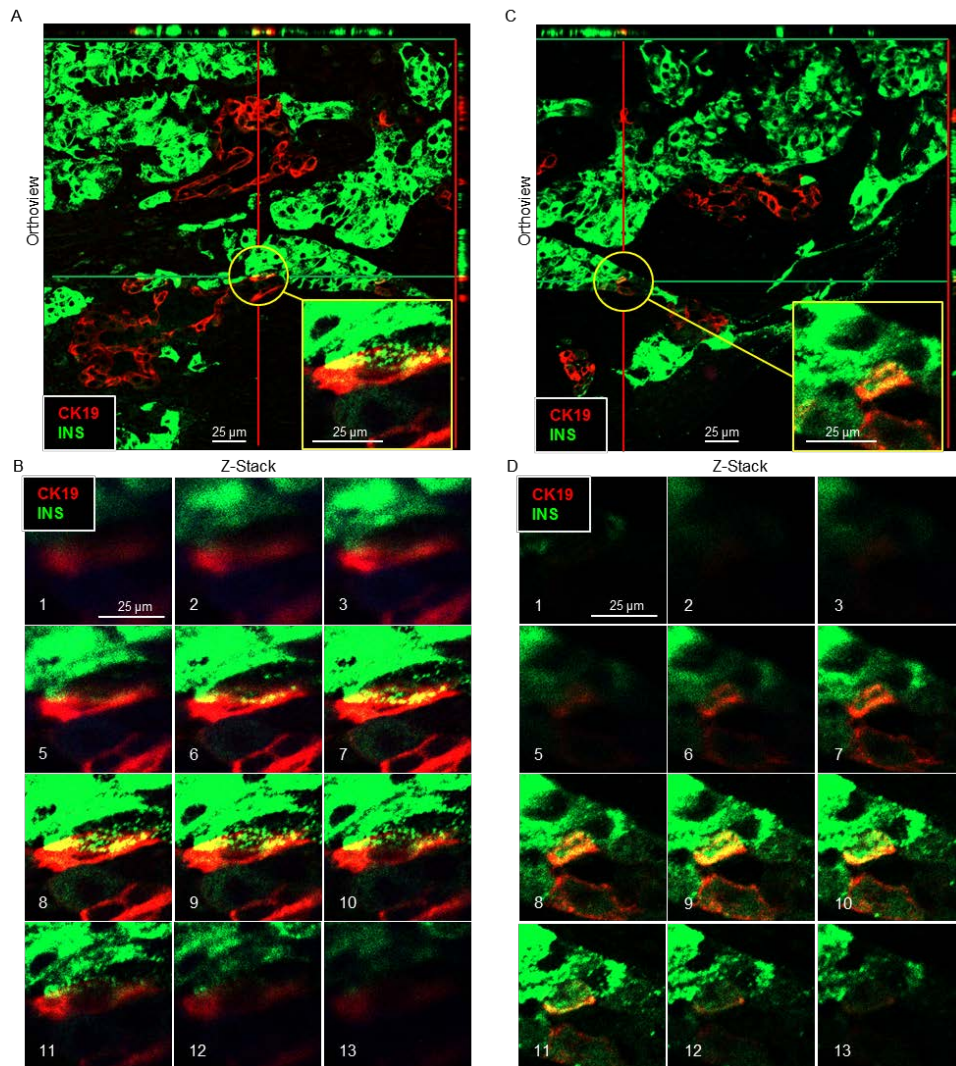

**Supplemental Figure 4: CK19 and insulin is co-expressed in human duct and islet grafts samples.** (A and C) Representative confocal images showing orthographic views of human islet and duct graft samples immunostained for CK19 (red) and insulin (green). Co-expression of CK19 and insulin is shown in yellow within the yellow circle. Inset in the bottom right shows the magnified image of CK19 and insulin co-expressing cells. (B and D) Images 1-13 are single slices taken from the z-stack in A and C showing different focal planes co-expressing CK19 and insulin. Scale bar: 25 μm.

## Supplemental Figure 5

Dirice E et al. Supplemental Figure 5

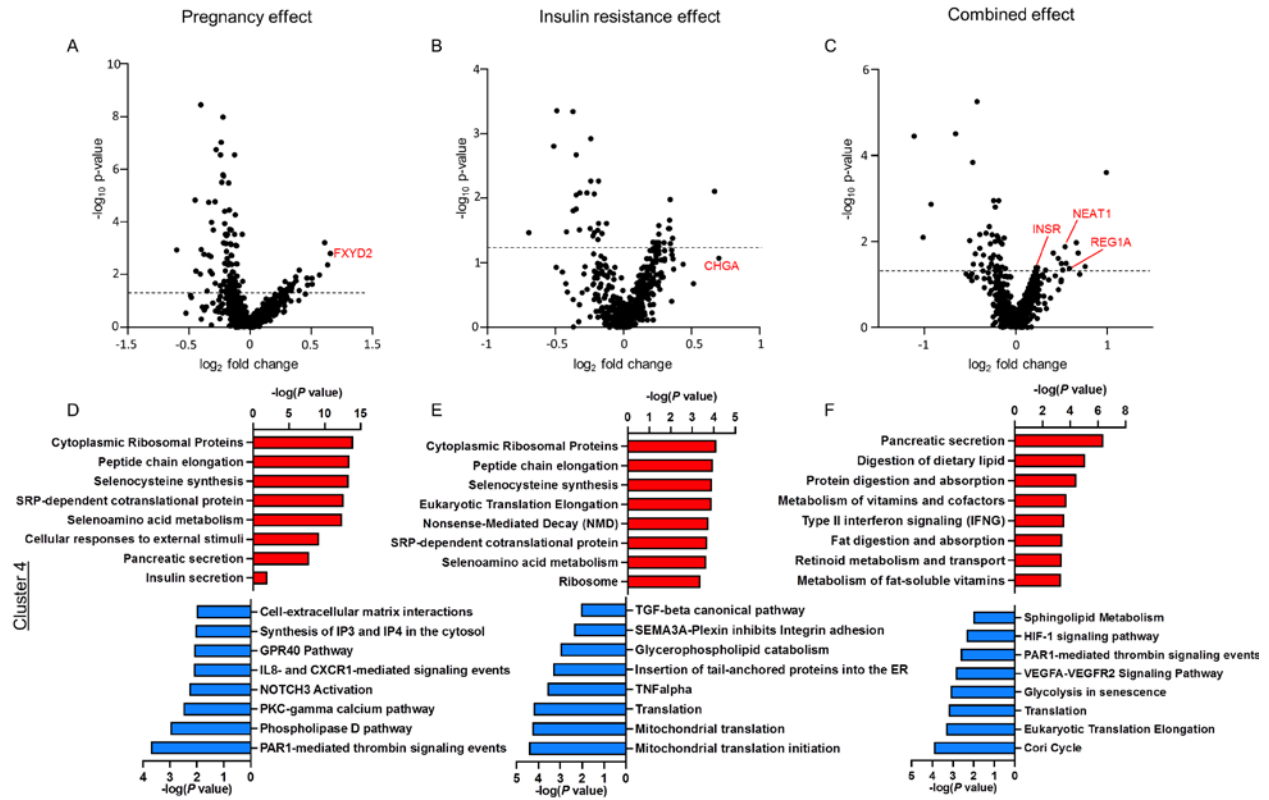

**Supplemental Figure 5: Differentially regulated genes and pathways in ductal cluster #4 in pregnancy, insulin resistant or combined models.** (A-C) Volcano plots showing the distribution of differential expression of transcripts defined as a function of fold change within the (A) pregnancy (P NSG-Lox vs. NP NSG-Lox), (B) insulin resistant (NP NSG-LIRKO vs. NP NSG-Lox), or (C) combined (P NSG-LIRKO vs. NP NSG-Lox) models and *P* value for ductal cluster #4. (D-F) Selected pathways in ductal cluster #4 differentially regulated in (D) pregnancy (P NSG-Lox vs. NP NSG-Lox), (E) insulin resistant (NP NSG-LIRKO vs. NP NSG-Lox), or (F) combined (P NSG-LIRKO vs. NP NSG-Lox) models. Upregulated pathways are shown in red, downregulated pathways are shown in blue.

## **Supplemental Tables**

### **Supplemental Table 1. Clinical characteristics of the human islet and duct donors.**

M; Male, F; Female, AA; W; White, BMI; Body Mass Index.

### **Supplemental Table 2: Selected differentially regulated pathways in the ductal cluster #2 of pregnant NSG-Lox mice compared to non-pregnant NSG-Lox mice (Pregnancy model).**

List of selected pathways analyzed by ConsensusPathDB. The p-value is calculated according to the hypergeometric test based on the number of physical entities present in both the predefined set and user-specified list of physical entities. Reference is cited in Methods.

### **Supplemental Table 3. Selected differentially regulated pathways in the ductal cluster #2 of non-pregnant NSG-LIRKO mice compared to non-pregnant NSG-Lox mice (Insulin Resistant model).**

List of selected pathways analyzed by ConsensusPathDB. The P value is calculated according to the hypergeometric test based on the number of physical entities present in both the predefined set and user-specified list of physical entities. Reference is cited in Methods.

### **Supplemental Table 4. Selected differentially regulated pathways in the ductal cluster #2 of pregnant NSG-LIRKO mice compared to non-pregnant NSG-Lox mice (Combined model).**

List of selected pathways analyzed by ConsensusPathDB. The P value is calculated according to the hypergeometric test based on the number of physical entities present in both the predefined set and user-specified list of physical entities. Reference is cited in Methods.

**Supplemental Table 5. Selected differentially regulated pathways in the ductal cluster #4 of pregnant NSG-Lox mice compared to non-pregnant NSG-Lox mice (Pregnancy model).**

List of selected pathways analyzed by ConsensusPathDB. The P value is calculated according to the hypergeometric test based on the number of physical entities present in both the predefined set and user-specified list of physical entities. Reference is cited in Methods.

**Supplemental Table 6: Selected differentially regulated pathways in the ductal cluster #4 of non-pregnant NSG-LIRKO mice compared to non-pregnant NSG-Lox mice (Insulin Resistant model).**

List of selected pathways analyzed by ConsensusPathDB. The P value is calculated according to the hypergeometric test based on the number of physical entities present in both the predefined set and user-specified list of physical entities. Reference is cited in Methods.

**Supplemental Table 7. Selected differentially regulated pathways in the ductal cluster #4 of pregnant NSG-LIRKO mice compared to non-pregnant NSG-Lox mice (Combined model).**

List of selected pathways analyzed by ConsensusPathDB. The P value is calculated according to the hypergeometric test based on the number of physical entities present in both the predefined set and user-specified list of physical entities. Reference is cited in Methods.

**Supplemental Table 8. Selected differentially regulated pathways in type 2 diabetic human beta cells compared to non-diabetic cases (Publicly Available dataset, GSE81608).**

The P value is calculated according to the hypergeometric test based on the number of physical entities

present in both the predefined set and user-specified list of physical entities. Reference is cited in Methods.

**Supplemental Table 9. Sequences of oligonucleotides used for real time PCR.**

**Supplemental Table 1. Clinical characteristics of the human islet and duct donors.**

| <b>Human Islet + Duct Transplantation</b> (ducts were isolated from same donor) |                           |               |            |                  |            |                   |                      |
|---------------------------------------------------------------------------------|---------------------------|---------------|------------|------------------|------------|-------------------|----------------------|
| <b>Figure</b>                                                                   | <b>Source and Case ID</b> | <b>Gender</b> | <b>Age</b> | <b>Ethnicity</b> | <b>BMI</b> | <b>Purity (%)</b> | <b>Viability (%)</b> |
| 3-Jan                                                                           | Prodo, HP17272            | M             | 48         | W                | 23.9       | 90                | 95                   |
|                                                                                 | Prodo, HP17281            | M             | 55         | W                | 30.1       | 90                | 95                   |
|                                                                                 | Prodo, HP-17307           | M             | 55         | W                | 27.1       | 90                | 95                   |
|                                                                                 | Prodo, HP-17328           | F             | 48         | W                | 25         | 90                | 95                   |

M; Male, F; Female, AA; W; White, BMI; Body Mass Index.

**Supplemental Table 2. Selected differentially regulated pathways in the ductal cluster #2 of pregnant NSG-Lox mice compared to non-pregnant NSG-Lox mice (Pregnancy model)**

List of selected pathways analyzed by ConsensusPathDB.

The p-value is calculated according to the hypergeometric test based on the number of physical entities present in both the predefined set and user-specified list of physical entities. Reference is cited in Methods.

| <b>UPREGULATED pathways</b>                                                                   | <b>set size</b> | <b>candidates contained</b> | <b>p value</b> | <b>q value</b> | <b>Pathways database</b> |
|-----------------------------------------------------------------------------------------------|-----------------|-----------------------------|----------------|----------------|--------------------------|
| SRP-dependent cotranslational protein targeting to membrane                                   | <u>123</u>      | <u>8 (6.5%)</u>             | 2.55E-11       | 6.46E-09       | Reactome                 |
| Cytoplasmic Ribosomal Proteins                                                                | <u>88</u>       | <u>7 (8.0%)</u>             | 1.28E-10       | 1.62E-08       | Wikipathways             |
| Peptide chain elongation                                                                      | <u>100</u>      | <u>7 (7.0%)</u>             | 3.19E-10       | 1.63E-08       | Reactome                 |
| Eukaryotic Translation Termination                                                            | <u>103</u>      | <u>7 (6.8%)</u>             | 3.94E-10       | 1.63E-08       | Reactome                 |
| Selenocysteine synthesis                                                                      | <u>103</u>      | <u>7 (6.8%)</u>             | 3.94E-10       | 1.63E-08       | Reactome                 |
| Nonsense Mediated Decay (NMD) independent of the Exon Junction Complex (EJC)                  | <u>105</u>      | <u>7 (6.7%)</u>             | 4.52E-10       | 1.63E-08       | Reactome                 |
| Eukaryotic Translation Elongation                                                             | <u>105</u>      | <u>7 (6.7%)</u>             | 4.52E-10       | 1.63E-08       | Reactome                 |
| Response of EIF2AK4 (GCN2) to amino acid deficiency                                           | <u>111</u>      | <u>7 (6.3%)</u>             | 6.69E-10       | 2.12E-08       | Reactome                 |
| Formation of a pool of free 40S subunits                                                      | <u>113</u>      | <u>7 (6.2%)</u>             | 7.60E-10       | 2.14E-08       | Reactome                 |
| Nonsense Mediated Decay (NMD) enhanced by the Exon Junction Complex (EJC)                     | <u>117</u>      | <u>7 (6.0%)</u>             | 9.71E-10       | 2.23E-08       | Reactome                 |
| Nonsense-Mediated Decay (NMD)                                                                 | <u>117</u>      | <u>7 (6.0%)</u>             | 9.71E-10       | 2.23E-08       | Reactome                 |
| L13a-mediated translational silencing of Ceruloplasmin expression                             | <u>123</u>      | <u>7 (5.7%)</u>             | 1.38E-09       | 2.85E-08       | Reactome                 |
| GTP hydrolysis and joining of the 60S ribosomal subunit                                       | <u>124</u>      | <u>7 (5.6%)</u>             | 1.46E-09       | 2.85E-08       | Reactome                 |
| Selenoamino acid metabolism                                                                   | <u>128</u>      | <u>7 (5.5%)</u>             | 1.83E-09       | 3.30E-08       | Reactome                 |
| Cap-dependent Translation Initiation                                                          | <u>131</u>      | <u>7 (5.3%)</u>             | 2.15E-09       | 3.40E-08       | Reactome                 |
| Eukaryotic Translation Initiation                                                             | <u>131</u>      | <u>7 (5.3%)</u>             | 2.15E-09       | 3.40E-08       | Reactome                 |
| Cellular response to starvation                                                               | <u>145</u>      | <u>7 (4.8%)</u>             | 4.38E-09       | 6.52E-08       | Reactome                 |
| Ribosome - Homo sapiens (human)                                                               | <u>158</u>      | <u>7 (4.4%)</u>             | 7.97E-09       | 1.12E-07       | KEGG                     |
| Metabolism                                                                                    | <u>1954</u>     | <u>16 (0.8%)</u>            | 8.59E-09       | 1.14E-07       | Reactome                 |
| Cellular responses to stress                                                                  | <u>554</u>      | <u>10 (1.8%)</u>            | 1.50E-08       | 1.90E-07       | Reactome                 |
| Cellular responses to external stimuli                                                        | <u>569</u>      | <u>10 (1.8%)</u>            | 1.94E-08       | 2.33E-07       | Reactome                 |
| Translation                                                                                   | <u>307</u>      | <u>8 (2.6%)</u>             | 3.63E-08       | 4.18E-07       | Reactome                 |
| Formation of the ternary complex, and subsequently, the 43S complex                           | <u>59</u>       | <u>5 (8.5%)</u>             | 5.48E-08       | 6.03E-07       | Reactome                 |
| Metabolism of amino acids and derivatives                                                     | <u>339</u>      | <u>8 (2.4%)</u>             | 7.83E-08       | 8.25E-07       | Reactome                 |
| Ribosomal scanning and start codon recognition                                                | <u>66</u>       | <u>5 (7.6%)</u>             | 9.70E-08       | 9.44E-07       | Reactome                 |
| Translation initiation complex formation                                                      | <u>66</u>       | <u>5 (7.6%)</u>             | 9.70E-08       | 9.44E-07       | Reactome                 |
| Activation of the mRNA upon binding of the cap-binding complex and eIFs, and subsequent       | <u>67</u>       | <u>5 (7.5%)</u>             | 1.05E-07       | 9.81E-07       | Reactome                 |
| Coronavirus disease - COVID-19 - Homo sapiens (human)                                         | <u>232</u>      | <u>7 (3.0%)</u>             | 1.10E-07       | 9.90E-07       | KEGG                     |
| Spirolactone Action Pathway                                                                   | <u>33</u>       | <u>3 (9.1%)</u>             | 2.64E-05       | 0.000117       | SMPDB                    |
| Eplerenone Action Pathway                                                                     | <u>33</u>       | <u>3 (9.1%)</u>             | 2.64E-05       | 0.000117       | SMPDB                    |
| Triamterene Action Pathway                                                                    | <u>33</u>       | <u>3 (9.1%)</u>             | 2.64E-05       | 0.000117       | SMPDB                    |
| Amiloride Action Pathway                                                                      | <u>33</u>       | <u>3 (9.1%)</u>             | 2.64E-05       | 0.000117       | SMPDB                    |
| Torsemide Action Pathway                                                                      | <u>33</u>       | <u>3 (9.1%)</u>             | 2.64E-05       | 0.000117       | SMPDB                    |
| Iminoglycinuria                                                                               | <u>33</u>       | <u>3 (9.1%)</u>             | 2.64E-05       | 0.000117       | SMPDB                    |
| Lysinuric Protein Intolerance                                                                 | <u>33</u>       | <u>3 (9.1%)</u>             | 2.64E-05       | 0.000117       | SMPDB                    |
| Blue diaper syndrome                                                                          | <u>33</u>       | <u>3 (9.1%)</u>             | 2.64E-05       | 0.000117       | SMPDB                    |
| Lysinuric protein intolerance (LPI)                                                           | <u>33</u>       | <u>3 (9.1%)</u>             | 2.64E-05       | 0.000117       | SMPDB                    |
| Cystinuria                                                                                    | <u>33</u>       | <u>3 (9.1%)</u>             | 2.64E-05       | 0.000117       | SMPDB                    |
| Hartnup Disorder                                                                              | <u>33</u>       | <u>3 (9.1%)</u>             | 2.64E-05       | 0.000117       | SMPDB                    |
| Glucose Transporter Defect (SGLT2)                                                            | <u>33</u>       | <u>3 (9.1%)</u>             | 2.64E-05       | 0.000117       | SMPDB                    |
| Kidney Function                                                                               | <u>33</u>       | <u>3 (9.1%)</u>             | 2.64E-05       | 0.000117       | SMPDB                    |
| Glucose Transporter Defect (SGLT2)                                                            | <u>33</u>       | <u>3 (9.1%)</u>             | 2.64E-05       | 0.000117       | SMPDB                    |
| Quinethazone Action Pathway                                                                   | <u>33</u>       | <u>3 (9.1%)</u>             | 2.64E-05       | 0.000117       | SMPDB                    |
| Bendroflumethiazide Action Pathway                                                            | <u>33</u>       | <u>3 (9.1%)</u>             | 2.64E-05       | 0.000117       | SMPDB                    |
| Chlorthalidone Action Pathway                                                                 | <u>33</u>       | <u>3 (9.1%)</u>             | 2.64E-05       | 0.000117       | SMPDB                    |
| Trichlormethiazide Action Pathway                                                             | <u>33</u>       | <u>3 (9.1%)</u>             | 2.64E-05       | 0.000117       | SMPDB                    |
| Indapamide Action Pathway                                                                     | <u>33</u>       | <u>3 (9.1%)</u>             | 2.64E-05       | 0.000117       | SMPDB                    |
| Metolazone Action Pathway                                                                     | <u>33</u>       | <u>3 (9.1%)</u>             | 2.64E-05       | 0.000117       | SMPDB                    |
| Hydrochlorothiazide Action Pathway                                                            | <u>33</u>       | <u>3 (9.1%)</u>             | 2.64E-05       | 0.000117       | SMPDB                    |
| Cyclothiazide Action Pathway                                                                  | <u>33</u>       | <u>3 (9.1%)</u>             | 2.64E-05       | 0.000117       | SMPDB                    |
| Hydroflumethiazide Action Pathway                                                             | <u>33</u>       | <u>3 (9.1%)</u>             | 2.64E-05       | 0.000117       | SMPDB                    |
| Bumetanide Action Pathway                                                                     | <u>33</u>       | <u>3 (9.1%)</u>             | 2.64E-05       | 0.000117       | SMPDB                    |
| Ethacrynic Acid Action Pathway                                                                | <u>33</u>       | <u>3 (9.1%)</u>             | 2.64E-05       | 0.000117       | SMPDB                    |
| Furosemide Action Pathway                                                                     | <u>33</u>       | <u>3 (9.1%)</u>             | 2.64E-05       | 0.000117       | SMPDB                    |
| Polythiazide Action Pathway                                                                   | <u>33</u>       | <u>3 (9.1%)</u>             | 2.64E-05       | 0.000117       | SMPDB                    |
| Methyclothiazide Action Pathway                                                               | <u>33</u>       | <u>3 (9.1%)</u>             | 2.64E-05       | 0.000117       | SMPDB                    |
| Chlorothiazide Action Pathway                                                                 | <u>33</u>       | <u>3 (9.1%)</u>             | 2.64E-05       | 0.000117       | SMPDB                    |
| Metabolism of RNA                                                                             | <u>584</u>      | <u>7 (1.2%)</u>             | 5.07E-05       | 0.000221       | Reactome                 |
| Proximal tubule transport                                                                     | <u>57</u>       | <u>3 (5.3%)</u>             | 0.000138       | 0.00059        | Wikipathways             |
| Lactose Degradation                                                                           | <u>11</u>       | <u>2 (18.2%)</u>            | 0.000167       | 0.000691       | SMPDB                    |
| Lactose Intolerance                                                                           | <u>11</u>       | <u>2 (18.2%)</u>            | 0.000167       | 0.000691       | SMPDB                    |
| Trehalose Degradation                                                                         | <u>12</u>       | <u>2 (16.7%)</u>            | 0.0002         | 0.000815       | SMPDB                    |
| Thyroid hormone synthesis - Homo sapiens (human)                                              | <u>75</u>       | <u>3 (4.0%)</u>             | 0.000311       | 0.00125        | KEGG                     |
| Potential therapeutics for SARS                                                               | <u>80</u>       | <u>3 (3.8%)</u>             | 0.000376       | 0.00149        | Reactome                 |
| Formation of ATP by chemiosmotic coupling                                                     | <u>18</u>       | <u>2 (11.1%)</u>            | 0.00046        | 0.00176        | Reactome                 |
| Cristae formation                                                                             | <u>18</u>       | <u>2 (11.1%)</u>            | 0.00046        | 0.00176        | Reactome                 |
| Insulin secretion - Homo sapiens (human)                                                      | <u>86</u>       | <u>3 (3.5%)</u>             | 0.000465       | 0.00176        | KEGG                     |
| Cardiac muscle contraction - Homo sapiens (human)                                             | <u>87</u>       | <u>3 (3.4%)</u>             | 0.000481       | 0.00179        | KEGG                     |
| Purine metabolism                                                                             | <u>222</u>      | <u>4 (1.8%)</u>             | 0.000595       | 0.00218        | EHMN                     |
| Chaperone Mediated Autophagy                                                                  | <u>22</u>       | <u>2 (9.1%)</u>             | 0.000691       | 0.00248        | Reactome                 |
| Thermogenesis - Homo sapiens (human)                                                          | <u>232</u>      | <u>4 (1.7%)</u>             | 0.000702       | 0.00248        | KEGG                     |
| Proximal tubule bicarbonate reclamation - Homo sapiens (human)                                | <u>23</u>       | <u>2 (8.7%)</u>             | 0.000756       | 0.00248        | KEGG                     |
| Response of Mtb to phagocytosis                                                               | <u>23</u>       | <u>2 (8.7%)</u>             | 0.000756       | 0.00248        | Reactome                 |
| Pancreatic secretion - Homo sapiens (human)                                                   | <u>102</u>      | <u>3 (2.9%)</u>             | 0.000766       | 0.00248        | KEGG                     |
| Electron Transport Chain (OXPHOS system in mitochondria)                                      | <u>103</u>      | <u>3 (2.9%)</u>             | 0.000788       | 0.00248        | Wikipathways             |
| Protein digestion and absorption - Homo sapiens (human)                                       | <u>103</u>      | <u>3 (2.9%)</u>             | 0.000788       | 0.00248        | KEGG                     |
| HSF1 activation                                                                               | <u>25</u>       | <u>2 (8.0%)</u>             | 0.000895       | 0.00248        | Reactome                 |
| SARS-CoV Infections                                                                           | <u>111</u>      | <u>3 (2.7%)</u>             | 0.000979       | 0.00248        | Reactome                 |
| Respiratory electron transport, ATP synthesis by chemiosmotic coupling, and heat production t | <u>113</u>      | <u>3 (2.7%)</u>             | 0.00103        | 0.00248        | Reactome                 |
| Infection with Mycobacterium tuberculosis                                                     | <u>27</u>       | <u>2 (7.4%)</u>             | 0.00104        | 0.00248        | Reactome                 |
| Metabolism of proteins                                                                        | <u>1935</u>     | <u>10 (0.5%)</u>            | 0.00106        | 0.00248        | Reactome                 |
| Levomethyl Acetate Action Pathway                                                             | <u>29</u>       | <u>2 (6.9%)</u>             | 0.00121        | 0.00248        | SMPDB                    |
| Levallorphan Action Pathway                                                                   | <u>29</u>       | <u>2 (6.9%)</u>             | 0.00121        | 0.00248        | SMPDB                    |
| Dimethylthiambutene Action Pathway                                                            | <u>29</u>       | <u>2 (6.9%)</u>             | 0.00121        | 0.00248        | SMPDB                    |
| Ethylmorphine Action Pathway                                                                  | <u>29</u>       | <u>2 (6.9%)</u>             | 0.00121        | 0.00248        | SMPDB                    |

|                                                                                  |            |                 |         |         |          |
|----------------------------------------------------------------------------------|------------|-----------------|---------|---------|----------|
| Pentazocine Action Pathway                                                       | <u>29</u>  | <u>2 (6.9%)</u> | 0.00121 | 0.00248 | SMPDB    |
| Naltrexone Action Pathway                                                        | <u>29</u>  | <u>2 (6.9%)</u> | 0.00121 | 0.00248 | SMPDB    |
| Buprenorphine Action Pathway                                                     | <u>29</u>  | <u>2 (6.9%)</u> | 0.00121 | 0.00248 | SMPDB    |
| Alvimopan Action Pathway                                                         | <u>29</u>  | <u>2 (6.9%)</u> | 0.00121 | 0.00248 | SMPDB    |
| Naloxone Action Pathway                                                          | <u>29</u>  | <u>2 (6.9%)</u> | 0.00121 | 0.00248 | SMPDB    |
| Dihydromorphine Action Pathway                                                   | <u>29</u>  | <u>2 (6.9%)</u> | 0.00121 | 0.00248 | SMPDB    |
| Ketobemidone Action Pathway                                                      | <u>29</u>  | <u>2 (6.9%)</u> | 0.00121 | 0.00248 | SMPDB    |
| Levorphanol Action Pathway                                                       | <u>29</u>  | <u>2 (6.9%)</u> | 0.00121 | 0.00248 | SMPDB    |
| Propoxyphene Action Pathway                                                      | <u>29</u>  | <u>2 (6.9%)</u> | 0.00121 | 0.00248 | SMPDB    |
| Tramadol Action Action Pathway                                                   | <u>29</u>  | <u>2 (6.9%)</u> | 0.00121 | 0.00248 | SMPDB    |
| Diphenoxylate Action Pathway                                                     | <u>29</u>  | <u>2 (6.9%)</u> | 0.00121 | 0.00248 | SMPDB    |
| Anileridine Action Pathway                                                       | <u>29</u>  | <u>2 (6.9%)</u> | 0.00121 | 0.00248 | SMPDB    |
| Oxycodone Action Pathway                                                         | <u>29</u>  | <u>2 (6.9%)</u> | 0.00121 | 0.00248 | SMPDB    |
| Alfentanil Action Pathway                                                        | <u>29</u>  | <u>2 (6.9%)</u> | 0.00121 | 0.00248 | SMPDB    |
| Oxymorphone Action Pathway                                                       | <u>29</u>  | <u>2 (6.9%)</u> | 0.00121 | 0.00248 | SMPDB    |
| Hydrocodone Action Pathway                                                       | <u>29</u>  | <u>2 (6.9%)</u> | 0.00121 | 0.00248 | SMPDB    |
| Hydromorphone Action Pathway                                                     | <u>29</u>  | <u>2 (6.9%)</u> | 0.00121 | 0.00248 | SMPDB    |
| Sufentanil Action Pathway                                                        | <u>29</u>  | <u>2 (6.9%)</u> | 0.00121 | 0.00248 | SMPDB    |
| Remifentanil Action Pathway                                                      | <u>29</u>  | <u>2 (6.9%)</u> | 0.00121 | 0.00248 | SMPDB    |
| Fentanyl Action Pathway                                                          | <u>29</u>  | <u>2 (6.9%)</u> | 0.00121 | 0.00248 | SMPDB    |
| Carfentanil Action Pathway                                                       | <u>29</u>  | <u>2 (6.9%)</u> | 0.00121 | 0.00248 | SMPDB    |
| 3-Methylthiofentanyl Action Pathway                                              | <u>29</u>  | <u>2 (6.9%)</u> | 0.00121 | 0.00248 | SMPDB    |
| Methadyl Acetate Action Pathway                                                  | <u>29</u>  | <u>2 (6.9%)</u> | 0.00121 | 0.00248 | SMPDB    |
| Dezocine Action Pathway                                                          | <u>29</u>  | <u>2 (6.9%)</u> | 0.00121 | 0.00248 | SMPDB    |
| Mepivacaine Action Pathway                                                       | <u>29</u>  | <u>2 (6.9%)</u> | 0.00121 | 0.00248 | SMPDB    |
| Chloroprocaine Action Pathway                                                    | <u>29</u>  | <u>2 (6.9%)</u> | 0.00121 | 0.00248 | SMPDB    |
| Dibucaine Action Pathway                                                         | <u>29</u>  | <u>2 (6.9%)</u> | 0.00121 | 0.00248 | SMPDB    |
| Levobupivacaine Action Pathway                                                   | <u>29</u>  | <u>2 (6.9%)</u> | 0.00121 | 0.00248 | SMPDB    |
| Benzocaine Action Pathway                                                        | <u>29</u>  | <u>2 (6.9%)</u> | 0.00121 | 0.00248 | SMPDB    |
| Bupivacaine Action Pathway                                                       | <u>29</u>  | <u>2 (6.9%)</u> | 0.00121 | 0.00248 | SMPDB    |
| Oxybuprocaine Action Pathway                                                     | <u>29</u>  | <u>2 (6.9%)</u> | 0.00121 | 0.00248 | SMPDB    |
| Prilocaine Action Pathway                                                        | <u>29</u>  | <u>2 (6.9%)</u> | 0.00121 | 0.00248 | SMPDB    |
| Procaine Action Pathway                                                          | <u>29</u>  | <u>2 (6.9%)</u> | 0.00121 | 0.00248 | SMPDB    |
| Proparacaine Action Pathway                                                      | <u>29</u>  | <u>2 (6.9%)</u> | 0.00121 | 0.00248 | SMPDB    |
| Ropivacaine Action Pathway                                                       | <u>29</u>  | <u>2 (6.9%)</u> | 0.00121 | 0.00248 | SMPDB    |
| Cocaine Action Pathway                                                           | <u>29</u>  | <u>2 (6.9%)</u> | 0.00121 | 0.00248 | SMPDB    |
| Escitalopram Action Pathway                                                      | <u>29</u>  | <u>2 (6.9%)</u> | 0.00121 | 0.00248 | SMPDB    |
| Attenuation phase                                                                | <u>29</u>  | <u>2 (6.9%)</u> | 0.00121 | 0.00248 | Reactome |
| Nalbuphine Action Pathway                                                        | <u>30</u>  | <u>2 (6.7%)</u> | 0.00129 | 0.00261 | SMPDB    |
| Desipramine Action Pathway                                                       | <u>30</u>  | <u>2 (6.7%)</u> | 0.00129 | 0.00261 | SMPDB    |
| Lidocaine (Local Anaesthetic) Action Pathway                                     | <u>31</u>  | <u>2 (6.5%)</u> | 0.00138 | 0.00277 | SMPDB    |
| Heroin Action Pathway                                                            | <u>32</u>  | <u>2 (6.2%)</u> | 0.00147 | 0.0029  | SMPDB    |
| Codeine Action Pathway                                                           | <u>32</u>  | <u>2 (6.2%)</u> | 0.00147 | 0.0029  | SMPDB    |
| Imipramine Action Pathway                                                        | <u>33</u>  | <u>2 (6.1%)</u> | 0.00156 | 0.00306 | SMPDB    |
| Oxidative phosphorylation - Homo sapiens (human)                                 | <u>133</u> | <u>3 (2.3%)</u> | 0.00165 | 0.0032  | KEGG     |
| Fluoxetine Action Pathway                                                        | <u>34</u>  | <u>2 (5.9%)</u> | 0.00166 | 0.0032  | SMPDB    |
| Infectious disease                                                               | <u>750</u> | <u>6 (0.8%)</u> | 0.00168 | 0.00322 | Reactome |
| Nicotine Action Pathway                                                          | <u>36</u>  | <u>2 (5.6%)</u> | 0.00186 | 0.00348 | SMPDB    |
| Methadone Action Pathway                                                         | <u>36</u>  | <u>2 (5.6%)</u> | 0.00186 | 0.00348 | SMPDB    |
| Citalopram Action Pathway                                                        | <u>36</u>  | <u>2 (5.6%)</u> | 0.00186 | 0.00348 | SMPDB    |
| Aldosterone-regulated sodium reabsorption - Homo sapiens (human)                 | <u>37</u>  | <u>2 (5.4%)</u> | 0.00196 | 0.00362 | KEGG     |
| HSF1-dependent transactivation                                                   | <u>37</u>  | <u>2 (5.4%)</u> | 0.00196 | 0.00362 | Reactome |
| adenosine ribonucleotides <i>de novo</i> biosynthesis                            | <u>38</u>  | <u>2 (5.3%)</u> | 0.00207 | 0.00379 | HumanCyc |
| Ion homeostasis                                                                  | <u>44</u>  | <u>2 (4.5%)</u> | 0.00276 | 0.005   | Reactome |
| Morphine Action Pathway                                                          | <u>44</u>  | <u>2 (4.5%)</u> | 0.00276 | 0.005   | SMPDB    |
| Retinoid metabolism and transport                                                | <u>45</u>  | <u>2 (4.4%)</u> | 0.00289 | 0.00515 | Reactome |
| The citric acid (TCA) cycle and respiratory electron transport                   | <u>162</u> | <u>3 (1.9%)</u> | 0.00289 | 0.00515 | Reactome |
| Ion channel transport                                                            | <u>165</u> | <u>3 (1.8%)</u> | 0.00305 | 0.00539 | Reactome |
| Carbohydrate digestion and absorption - Homo sapiens (human)                     | <u>47</u>  | <u>2 (4.3%)</u> | 0.00315 | 0.00549 | KEGG     |
| Ion transport by P-type ATPases                                                  | <u>47</u>  | <u>2 (4.3%)</u> | 0.00315 | 0.00549 | Reactome |
| Metabolism of fat-soluble vitamins                                               | <u>49</u>  | <u>2 (4.1%)</u> | 0.00342 | 0.00592 | Reactome |
| Endocrine and other factor-regulated calcium reabsorption - Homo sapiens (human) | <u>53</u>  | <u>2 (3.8%)</u> | 0.00399 | 0.00674 | KEGG     |
| Mitochondrial biogenesis                                                         | <u>53</u>  | <u>2 (3.8%)</u> | 0.00399 | 0.00674 | Reactome |
| Mineral absorption - Homo sapiens (human)                                        | <u>59</u>  | <u>2 (3.4%)</u> | 0.00492 | 0.00674 | KEGG     |
| superpathway of purine nucleotide salvage                                        | <u>59</u>  | <u>2 (3.4%)</u> | 0.00492 | 0.00674 | HumanCyc |
| purine nucleotides <i>de novo</i> biosynthesis                                   | <u>59</u>  | <u>2 (3.4%)</u> | 0.00492 | 0.00674 | HumanCyc |
| Bopindolol Action Pathway                                                        | <u>61</u>  | <u>2 (3.3%)</u> | 0.00525 | 0.00674 | SMPDB    |
| Timolol Action Pathway                                                           | <u>61</u>  | <u>2 (3.3%)</u> | 0.00525 | 0.00674 | SMPDB    |
| Carteolol Action Pathway                                                         | <u>61</u>  | <u>2 (3.3%)</u> | 0.00525 | 0.00674 | SMPDB    |
| Bevantolol Action Pathway                                                        | <u>61</u>  | <u>2 (3.3%)</u> | 0.00525 | 0.00674 | SMPDB    |
| Practolol Action Pathway                                                         | <u>61</u>  | <u>2 (3.3%)</u> | 0.00525 | 0.00674 | SMPDB    |
| Dobutamine Action Pathway                                                        | <u>61</u>  | <u>2 (3.3%)</u> | 0.00525 | 0.00674 | SMPDB    |
| Isoprenaline Action Pathway                                                      | <u>61</u>  | <u>2 (3.3%)</u> | 0.00525 | 0.00674 | SMPDB    |
| Arbutamine Action Pathway                                                        | <u>61</u>  | <u>2 (3.3%)</u> | 0.00525 | 0.00674 | SMPDB    |
| Levobunolol Action Pathway                                                       | <u>61</u>  | <u>2 (3.3%)</u> | 0.00525 | 0.00674 | SMPDB    |
| Metipranolol Action Pathway                                                      | <u>61</u>  | <u>2 (3.3%)</u> | 0.00525 | 0.00674 | SMPDB    |
| Sotalol Action Pathway                                                           | <u>61</u>  | <u>2 (3.3%)</u> | 0.00525 | 0.00674 | SMPDB    |
| Epinephrine Action Pathway                                                       | <u>61</u>  | <u>2 (3.3%)</u> | 0.00525 | 0.00674 | SMPDB    |
| Betaxolol Action Pathway                                                         | <u>61</u>  | <u>2 (3.3%)</u> | 0.00525 | 0.00674 | SMPDB    |
| Atenolol Action Pathway                                                          | <u>61</u>  | <u>2 (3.3%)</u> | 0.00525 | 0.00674 | SMPDB    |
| Alprenolol Action Pathway                                                        | <u>61</u>  | <u>2 (3.3%)</u> | 0.00525 | 0.00674 | SMPDB    |
| Acebutolol Action Pathway                                                        | <u>61</u>  | <u>2 (3.3%)</u> | 0.00525 | 0.00674 | SMPDB    |
| Propranolol Action Pathway                                                       | <u>61</u>  | <u>2 (3.3%)</u> | 0.00525 | 0.00674 | SMPDB    |
| Pindolol Action Pathway                                                          | <u>61</u>  | <u>2 (3.3%)</u> | 0.00525 | 0.00674 | SMPDB    |
| Penbutolol Action Pathway                                                        | <u>61</u>  | <u>2 (3.3%)</u> | 0.00525 | 0.00674 | SMPDB    |
| Oxprenolol Action Pathway                                                        | <u>61</u>  | <u>2 (3.3%)</u> | 0.00525 | 0.00674 | SMPDB    |
| Metoprolol Action Pathway                                                        | <u>61</u>  | <u>2 (3.3%)</u> | 0.00525 | 0.00674 | SMPDB    |
| Esmolol Action Pathway                                                           | <u>61</u>  | <u>2 (3.3%)</u> | 0.00525 | 0.00674 | SMPDB    |
| Bisoprolol Action Pathway                                                        | <u>61</u>  | <u>2 (3.3%)</u> | 0.00525 | 0.00674 | SMPDB    |
| Bupranolol Action Pathway                                                        | <u>61</u>  | <u>2 (3.3%)</u> | 0.00525 | 0.00674 | SMPDB    |
| Nebivololol Action Pathway                                                       | <u>61</u>  | <u>2 (3.3%)</u> | 0.00525 | 0.00674 | SMPDB    |

|                                               |             |                 |         |         |              |
|-----------------------------------------------|-------------|-----------------|---------|---------|--------------|
| Nadolol Action Pathway                        | <u>61</u>   | <u>2 (3.3%)</u> | 0.00525 | 0.00674 | SMPDB        |
| Muscle/Heart Contraction                      | <u>61</u>   | <u>2 (3.3%)</u> | 0.00525 | 0.00674 | SMPDB        |
| Diltiazem Action Pathway                      | <u>61</u>   | <u>2 (3.3%)</u> | 0.00525 | 0.00674 | SMPDB        |
| Amlodipine Action Pathway                     | <u>61</u>   | <u>2 (3.3%)</u> | 0.00525 | 0.00674 | SMPDB        |
| Verapamil Action Pathway                      | <u>61</u>   | <u>2 (3.3%)</u> | 0.00525 | 0.00674 | SMPDB        |
| Nitrendipine Action Pathway                   | <u>61</u>   | <u>2 (3.3%)</u> | 0.00525 | 0.00674 | SMPDB        |
| Nisoldipine Action Pathway                    | <u>61</u>   | <u>2 (3.3%)</u> | 0.00525 | 0.00674 | SMPDB        |
| Nimodipine Action Pathway                     | <u>61</u>   | <u>2 (3.3%)</u> | 0.00525 | 0.00674 | SMPDB        |
| Isradipine Action Pathway                     | <u>61</u>   | <u>2 (3.3%)</u> | 0.00525 | 0.00674 | SMPDB        |
| Nifedipine Action Pathway                     | <u>61</u>   | <u>2 (3.3%)</u> | 0.00525 | 0.00674 | SMPDB        |
| Felodipine Action Pathway                     | <u>61</u>   | <u>2 (3.3%)</u> | 0.00525 | 0.00674 | SMPDB        |
| Quinidine Action Pathway                      | <u>61</u>   | <u>2 (3.3%)</u> | 0.00525 | 0.00674 | SMPDB        |
| Procainamide (Antiarrhythmic) Action Pathway  | <u>61</u>   | <u>2 (3.3%)</u> | 0.00525 | 0.00674 | SMPDB        |
| Disopyramide Action Pathway                   | <u>61</u>   | <u>2 (3.3%)</u> | 0.00525 | 0.00674 | SMPDB        |
| Fosphenytoin (Antiarrhythmic) Action Pathway  | <u>61</u>   | <u>2 (3.3%)</u> | 0.00525 | 0.00674 | SMPDB        |
| Mexiletine Action Pathway                     | <u>61</u>   | <u>2 (3.3%)</u> | 0.00525 | 0.00674 | SMPDB        |
| Tocainide Action Pathway                      | <u>61</u>   | <u>2 (3.3%)</u> | 0.00525 | 0.00674 | SMPDB        |
| Flecainide Action Pathway                     | <u>61</u>   | <u>2 (3.3%)</u> | 0.00525 | 0.00674 | SMPDB        |
| Amiodarone Action Pathway                     | <u>61</u>   | <u>2 (3.3%)</u> | 0.00525 | 0.00674 | SMPDB        |
| Ibutilide Action Pathway                      | <u>61</u>   | <u>2 (3.3%)</u> | 0.00525 | 0.00674 | SMPDB        |
| Oxidative phosphorylation                     | <u>61</u>   | <u>2 (3.3%)</u> | 0.00525 | 0.00674 | Wikipathways |
| Carvedilol Action Pathway                     | <u>62</u>   | <u>2 (3.2%)</u> | 0.00542 | 0.00689 | SMPDB        |
| Labetalol Action Pathway                      | <u>62</u>   | <u>2 (3.2%)</u> | 0.00542 | 0.00689 | SMPDB        |
| Lidocaine (Antiarrhythmic) Action Pathway     | <u>63</u>   | <u>2 (3.2%)</u> | 0.00559 | 0.00707 | SMPDB        |
| Cytoprotection by HMOX1                       | <u>65</u>   | <u>2 (3.1%)</u> | 0.00594 | 0.00748 | Reactome     |
| cAMP signaling pathway - Homo sapiens (human) | <u>216</u>  | <u>3 (1.4%)</u> | 0.00647 | 0.0081  | KEGG         |
| EGFR1                                         | <u>455</u>  | <u>4 (0.9%)</u> | 0.00799 | 0.00996 | NetPath      |
| Gastric acid secretion - Homo sapiens (human) | <u>76</u>   | <u>2 (2.6%)</u> | 0.00804 | 0.00997 | KEGG         |
| Disease                                       | <u>1029</u> | <u>6 (0.6%)</u> | 0.00808 | 0.00997 | Reactome     |
| Phenytoin (Antiarrhythmic) Action Pathway     | <u>82</u>   | <u>2 (2.4%)</u> | 0.00931 | 0.0114  | SMPDB        |
| Parkinson disease - Homo sapiens (human)      | <u>249</u>  | <u>3 (1.2%)</u> | 0.00955 | 0.0117  | KEGG         |

| <b>DOWNGULATED pathways</b>                                | <b>set size</b> | <b>candidates contained</b> | <b>p value</b> | <b>q value</b> | <b>Pathways database</b> |
|------------------------------------------------------------|-----------------|-----------------------------|----------------|----------------|--------------------------|
| RHOT2 GTPase cycle                                         | <u>7</u>        | <u>3 (42.9%)</u>            | 0.00217        | 0.513          | Reactome                 |
| Miro GTPase Cycle                                          | <u>8</u>        | <u>3 (37.5%)</u>            | 0.00336        | 0.513          | Reactome                 |
| S Phase                                                    | <u>104</u>      | <u>11 (10.6%)</u>           | 0.00374        | 0.513          | Reactome                 |
| Synthesis of DNA                                           | <u>76</u>       | <u>9 (11.8%)</u>            | 0.00398        | 0.513          | Reactome                 |
| Translesion synthesis by POLK                              | <u>17</u>       | <u>4 (23.5%)</u>            | 0.00446        | 0.513          | Reactome                 |
| fatty acid $\beta$ -oxidation (unsaturated, odd number)    | <u>3</u>        | <u>2 (66.7%)</u>            | 0.00497        | 0.513          | HumanCyc                 |
| DNA Replication                                            | <u>81</u>       | <u>9 (11.1%)</u>            | 0.00608        | 0.513          | Reactome                 |
| Dual Incision in GG-NER                                    | <u>41</u>       | <u>6 (14.6%)</u>            | 0.00635        | 0.513          | Reactome                 |
| Global Genome Nucleotide Excision Repair (GG-NER)          | <u>70</u>       | <u>8 (11.4%)</u>            | 0.00801        | 0.513          | Reactome                 |
| Nucleotide Excision Repair                                 | <u>43</u>       | <u>6 (14.0%)</u>            | 0.00804        | 0.513          | Wikipathways             |
| Post-translational protein modification                    | <u>1425</u>     | <u>77 (5.4%)</u>            | 0.00808        | 0.513          | Reactome                 |
| p53 transcriptional gene network                           | <u>72</u>       | <u>8 (11.1%)</u>            | 0.00946        | 0.513          | Wikipathways             |
| Astrocytic Glutamate-Glutamine Uptake And Metabolism       | <u>4</u>        | <u>2 (50.0%)</u>            | 0.00967        | 0.513          | Reactome                 |
| Neurotransmitter uptake and metabolism in glial cells      | <u>4</u>        | <u>2 (50.0%)</u>            | 0.00967        | 0.513          | Reactome                 |
| Conversion from APC/C:Cdc20 to APC/C:Cdh1 in late anaphase | <u>21</u>       | <u>4 (19.0%)</u>            | 0.00985        | 0.513          | Reactome                 |
| Phosphorylation of the APC/C                               | <u>21</u>       | <u>4 (19.0%)</u>            | 0.00985        | 0.513          | Reactome                 |

**Supplemental Table 3. Selected differentially regulated pathways in the ductal cluster #2 of non-pregnant NSG-LIRKO mice compared to non-pregnant NSG-Lox mice (Insulin Resistant model)**

List of selected pathways analyzed by ConsensusPathDB.

The p-value is calculated according to the hypergeometric test based on the number of physical entities present in both the predefined set and user-specified list of physical entities. Reference is cited in Methods.

| <b>UPREGULATED pathways</b>                                                  | <b>set size</b> | <b>candidates contained</b> | <b>p value</b> | <b>q value</b> | <b>Pathways database</b> |
|------------------------------------------------------------------------------|-----------------|-----------------------------|----------------|----------------|--------------------------|
| Peptide chain elongation                                                     | 100             | 6 (6.0%)                    | 7.25E-09       | 1.03E-06       | Reactome                 |
| Eukaryotic Translation Elongation                                            | 105             | 6 (5.7%)                    | 9.74E-09       | 1.03E-06       | Reactome                 |
| Cytoplasmic Ribosomal Proteins                                               | 88              | 5 (5.7%)                    | 2.01E-07       | 1.42E-05       | Wikipathways             |
| Eukaryotic Translation Termination                                           | 103             | 5 (4.9%)                    | 4.43E-07       | 1.72E-05       | Reactome                 |
| Selenocysteine synthesis                                                     | 103             | 5 (4.9%)                    | 4.43E-07       | 1.72E-05       | Reactome                 |
| Nonsense Mediated Decay (NMD) independent of the Exon Junction Complex (EJC) | 105             | 5 (4.8%)                    | 4.88E-07       | 1.72E-05       | Reactome                 |
| Response of EIF2AK4 (GCN2) to amino acid deficiency                          | 111             | 5 (4.5%)                    | 6.44E-07       | 1.77E-05       | Reactome                 |
| Formation of a pool of free 40S subunits                                     | 113             | 5 (4.4%)                    | 7.04E-07       | 1.77E-05       | Reactome                 |
| Nonsense Mediated Decay (NMD) enhanced by the Exon Junction Complex (EJC)    | 117             | 5 (4.3%)                    | 8.37E-07       | 1.77E-05       | Reactome                 |
| Nonsense-Mediated Decay (NMD)                                                | 117             | 5 (4.3%)                    | 8.37E-07       | 1.77E-05       | Reactome                 |
| L13a-mediated translational silencing of Ceruloplasmin expression            | 123             | 5 (4.1%)                    | 1.07E-06       | 1.82E-05       | Reactome                 |
| SRP-dependent cotranslational protein targeting to membrane                  | 123             | 5 (4.1%)                    | 1.07E-06       | 1.82E-05       | Reactome                 |
| GTP hydrolysis and joining of the 60S ribosomal subunit                      | 124             | 5 (4.0%)                    | 1.12E-06       | 1.82E-05       | Reactome                 |
| Selenoamino acid metabolism                                                  | 128             | 5 (3.9%)                    | 1.31E-06       | 1.94E-05       | Reactome                 |
| Cap-dependent Translation Initiation                                         | 131             | 5 (3.8%)                    | 1.47E-06       | 1.94E-05       | Reactome                 |
| Eukaryotic Translation Initiation                                            | 131             | 5 (3.8%)                    | 1.47E-06       | 1.94E-05       | Reactome                 |
| Cellular response to starvation                                              | 145             | 5 (3.4%)                    | 2.42E-06       | 3.02E-05       | Reactome                 |
| Ribosome - Homo sapiens (human)                                              | 158             | 5 (3.2%)                    | 3.69E-06       | 4.35E-05       | KEGG                     |
| Translation                                                                  | 307             | 6 (2.0%)                    | 5.51E-06       | 6.15E-05       | Reactome                 |
| Metabolism of amino acids and derivatives                                    | 339             | 6 (1.8%)                    | 9.73E-06       | 7.54E-05       | Reactome                 |
| Spirocholone Action Pathway                                                  | 33              | 3 (9.1%)                    | 1.74E-05       | 7.54E-05       | SMPDB                    |
| Eplerenone Action Pathway                                                    | 33              | 3 (9.1%)                    | 1.74E-05       | 7.54E-05       | SMPDB                    |
| Triamterene Action Pathway                                                   | 33              | 3 (9.1%)                    | 1.74E-05       | 7.54E-05       | SMPDB                    |
| Amiloride Action Pathway                                                     | 33              | 3 (9.1%)                    | 1.74E-05       | 7.54E-05       | SMPDB                    |
| Torsemide Action Pathway                                                     | 33              | 3 (9.1%)                    | 1.74E-05       | 7.54E-05       | SMPDB                    |
| Iminoglycinuria                                                              | 33              | 3 (9.1%)                    | 1.74E-05       | 7.54E-05       | SMPDB                    |
| Lysinuric Protein Intolerance                                                | 33              | 3 (9.1%)                    | 1.74E-05       | 7.54E-05       | SMPDB                    |
| Blue diaper syndrome                                                         | 33              | 3 (9.1%)                    | 1.74E-05       | 7.54E-05       | SMPDB                    |
| Lysinuric protein intolerance (LPI)                                          | 33              | 3 (9.1%)                    | 1.74E-05       | 7.54E-05       | SMPDB                    |
| Cystinuria                                                                   | 33              | 3 (9.1%)                    | 1.74E-05       | 7.54E-05       | SMPDB                    |
| Hartnup Disorder                                                             | 33              | 3 (9.1%)                    | 1.74E-05       | 7.54E-05       | SMPDB                    |
| Glucose Transporter Defect (SGLT2)                                           | 33              | 3 (9.1%)                    | 1.74E-05       | 7.54E-05       | SMPDB                    |
| Kidney Function                                                              | 33              | 3 (9.1%)                    | 1.74E-05       | 7.54E-05       | SMPDB                    |
| Glucose Transporter Defect (SGLT2)                                           | 33              | 3 (9.1%)                    | 1.74E-05       | 7.54E-05       | SMPDB                    |
| Quinethazone Action Pathway                                                  | 33              | 3 (9.1%)                    | 1.74E-05       | 7.54E-05       | SMPDB                    |
| Bendroflumethiazide Action Pathway                                           | 33              | 3 (9.1%)                    | 1.74E-05       | 7.54E-05       | SMPDB                    |
| Chlorthalidone Action Pathway                                                | 33              | 3 (9.1%)                    | 1.74E-05       | 7.54E-05       | SMPDB                    |
| Trichlormethiazide Action Pathway                                            | 33              | 3 (9.1%)                    | 1.74E-05       | 7.54E-05       | SMPDB                    |
| Indapamide Action Pathway                                                    | 33              | 3 (9.1%)                    | 1.74E-05       | 7.54E-05       | SMPDB                    |
| Metolazone Action Pathway                                                    | 33              | 3 (9.1%)                    | 1.74E-05       | 7.54E-05       | SMPDB                    |
| Hydrochlorothiazide Action Pathway                                           | 33              | 3 (9.1%)                    | 1.74E-05       | 7.54E-05       | SMPDB                    |
| Cyclothiazide Action Pathway                                                 | 33              | 3 (9.1%)                    | 1.74E-05       | 7.54E-05       | SMPDB                    |
| Hydroflumethiazide Action Pathway                                            | 33              | 3 (9.1%)                    | 1.74E-05       | 7.54E-05       | SMPDB                    |
| Bumetanide Action Pathway                                                    | 33              | 3 (9.1%)                    | 1.74E-05       | 7.54E-05       | SMPDB                    |
| Ethacrynic Acid Action Pathway                                               | 33              | 3 (9.1%)                    | 1.74E-05       | 7.54E-05       | SMPDB                    |
| Furosemide Action Pathway                                                    | 33              | 3 (9.1%)                    | 1.74E-05       | 7.54E-05       | SMPDB                    |
| Polythiazide Action Pathway                                                  | 33              | 3 (9.1%)                    | 1.74E-05       | 7.54E-05       | SMPDB                    |
| Methylclothiazide Action Pathway                                             | 33              | 3 (9.1%)                    | 1.74E-05       | 7.54E-05       | SMPDB                    |
| Chlorothiazide Action Pathway                                                | 33              | 3 (9.1%)                    | 1.74E-05       | 7.54E-05       | SMPDB                    |
| Coronavirus disease - COVID-19 - Homo sapiens (human)                        | 232             | 5 (2.2%)                    | 2.34E-05       | 9.92E-05       | KEGG                     |
| Proximal tubule transport                                                    | 57              | 3 (5.3%)                    | 9.12E-05       | 0.000379       | Wikipathways             |
| Lactose Degradation                                                          | 11              | 2 (18.2%)                   | 0.000127       | 0.000508       | SMPDB                    |
| Lactose Intolerance                                                          | 11              | 2 (18.2%)                   | 0.000127       | 0.000508       | SMPDB                    |
| Cellular responses to stress                                                 | 554             | 6 (1.1%)                    | 0.000151       | 0.000587       | Reactome                 |
| Trehalose Degradation                                                        | 12              | 2 (16.7%)                   | 0.000152       | 0.000587       | SMPDB                    |
| Cellular responses to external stimuli                                       | 569             | 6 (1.1%)                    | 0.000175       | 0.000663       | Reactome                 |
| Potential therapeutics for SARS                                              | 80              | 3 (3.8%)                    | 0.00025        | 0.000931       | Reactome                 |
| Insulin secretion - Homo sapiens (human)                                     | 86              | 3 (3.5%)                    | 0.00031        | 0.00112        | KEGG                     |
| Metabolism                                                                   | 1954            | 10 (0.5%)                   | 0.000311       | 0.00112        | Reactome                 |
| Protein digestion and absorption - Homo sapiens (human)                      | 103             | 3 (2.9%)                    | 0.000527       | 0.00183        | KEGG                     |
| Chaperone Mediated Autophagy                                                 | 22              | 2 (9.1%)                    | 0.000528       | 0.00183        | Reactome                 |
| Proximal tubule bicarbonate reclamation - Homo sapiens (human)               | 23              | 2 (8.7%)                    | 0.000577       | 0.00188        | KEGG                     |
| SARS-CoV Infections                                                          | 111             | 3 (2.7%)                    | 0.000655       | 0.00188        | Reactome                 |
| Levomethadyl Acetate Action Pathway                                          | 29              | 2 (6.9%)                    | 0.000921       | 0.00188        | SMPDB                    |
| Levallorphan Action Pathway                                                  | 29              | 2 (6.9%)                    | 0.000921       | 0.00188        | SMPDB                    |
| Dimethylthiambutene Action Pathway                                           | 29              | 2 (6.9%)                    | 0.000921       | 0.00188        | SMPDB                    |
| Ethylmorphine Action Pathway                                                 | 29              | 2 (6.9%)                    | 0.000921       | 0.00188        | SMPDB                    |
| Pentazocine Action Pathway                                                   | 29              | 2 (6.9%)                    | 0.000921       | 0.00188        | SMPDB                    |
| Naltrexone Action Pathway                                                    | 29              | 2 (6.9%)                    | 0.000921       | 0.00188        | SMPDB                    |
| Buprenorphine Action Pathway                                                 | 29              | 2 (6.9%)                    | 0.000921       | 0.00188        | SMPDB                    |
| Alvimopan Action Pathway                                                     | 29              | 2 (6.9%)                    | 0.000921       | 0.00188        | SMPDB                    |
| Naloxone Action Pathway                                                      | 29              | 2 (6.9%)                    | 0.000921       | 0.00188        | SMPDB                    |
| Dihydromorphine Action Pathway                                               | 29              | 2 (6.9%)                    | 0.000921       | 0.00188        | SMPDB                    |
| Ketobemidone Action Pathway                                                  | 29              | 2 (6.9%)                    | 0.000921       | 0.00188        | SMPDB                    |
| Levorphanol Action Pathway                                                   | 29              | 2 (6.9%)                    | 0.000921       | 0.00188        | SMPDB                    |
| Propoxyphene Action Pathway                                                  | 29              | 2 (6.9%)                    | 0.000921       | 0.00188        | SMPDB                    |
| Tramadol Action Pathway                                                      | 29              | 2 (6.9%)                    | 0.000921       | 0.00188        | SMPDB                    |
| Diphenoxylate Action Pathway                                                 | 29              | 2 (6.9%)                    | 0.000921       | 0.00188        | SMPDB                    |
| Anileridine Action Pathway                                                   | 29              | 2 (6.9%)                    | 0.000921       | 0.00188        | SMPDB                    |
| Oxycodone Action Pathway                                                     | 29              | 2 (6.9%)                    | 0.000921       | 0.00188        | SMPDB                    |
| Alfentanil Action Pathway                                                    | 29              | 2 (6.9%)                    | 0.000921       | 0.00188        | SMPDB                    |
| Oxymorphone Action Pathway                                                   | 29              | 2 (6.9%)                    | 0.000921       | 0.00188        | SMPDB                    |
| Hydrocodone Action Pathway                                                   | 29              | 2 (6.9%)                    | 0.000921       | 0.00188        | SMPDB                    |
| Hydromorphone Action Pathway                                                 | 29              | 2 (6.9%)                    | 0.000921       | 0.00188        | SMPDB                    |
| Sufentanil Action Pathway                                                    | 29              | 2 (6.9%)                    | 0.000921       | 0.00188        | SMPDB                    |
| Remifentanil Action Pathway                                                  | 29              | 2 (6.9%)                    | 0.000921       | 0.00188        | SMPDB                    |

|                                                                                                 |      |          |          |         |          |
|-------------------------------------------------------------------------------------------------|------|----------|----------|---------|----------|
| Fentanyl Action Pathway                                                                         | 29   | 2 (6.9%) | 0.000921 | 0.00188 | SMPDB    |
| Carfentanil Action Pathway                                                                      | 29   | 2 (6.9%) | 0.000921 | 0.00188 | SMPDB    |
| 3-Methylthiofentanyl Action Pathway                                                             | 29   | 2 (6.9%) | 0.000921 | 0.00188 | SMPDB    |
| Methadyl Acetate Action Pathway                                                                 | 29   | 2 (6.9%) | 0.000921 | 0.00188 | SMPDB    |
| Dezocine Action Pathway                                                                         | 29   | 2 (6.9%) | 0.000921 | 0.00188 | SMPDB    |
| Mepivacaine Action Pathway                                                                      | 29   | 2 (6.9%) | 0.000921 | 0.00188 | SMPDB    |
| Chloroprocaine Action Pathway                                                                   | 29   | 2 (6.9%) | 0.000921 | 0.00188 | SMPDB    |
| Dibucaine Action Pathway                                                                        | 29   | 2 (6.9%) | 0.000921 | 0.00188 | SMPDB    |
| Levobupivacaine Action Pathway                                                                  | 29   | 2 (6.9%) | 0.000921 | 0.00188 | SMPDB    |
| Benzocaine Action Pathway                                                                       | 29   | 2 (6.9%) | 0.000921 | 0.00188 | SMPDB    |
| Bupivacaine Action Pathway                                                                      | 29   | 2 (6.9%) | 0.000921 | 0.00188 | SMPDB    |
| Oxybuprocaine Action Pathway                                                                    | 29   | 2 (6.9%) | 0.000921 | 0.00188 | SMPDB    |
| Prilocaine Action Pathway                                                                       | 29   | 2 (6.9%) | 0.000921 | 0.00188 | SMPDB    |
| Procaine Action Pathway                                                                         | 29   | 2 (6.9%) | 0.000921 | 0.00188 | SMPDB    |
| Proparacaine Action Pathway                                                                     | 29   | 2 (6.9%) | 0.000921 | 0.00188 | SMPDB    |
| Ropivacaine Action Pathway                                                                      | 29   | 2 (6.9%) | 0.000921 | 0.00188 | SMPDB    |
| Cocaine Action Pathway                                                                          | 29   | 2 (6.9%) | 0.000921 | 0.00188 | SMPDB    |
| Escitalopram Action Pathway                                                                     | 29   | 2 (6.9%) | 0.000921 | 0.00188 | SMPDB    |
| Nalbuphine Action Pathway                                                                       | 30   | 2 (6.7%) | 0.000986 | 0.00197 | SMPDB    |
| Desipramine Action Pathway                                                                      | 30   | 2 (6.7%) | 0.000986 | 0.00197 | SMPDB    |
| Lidocaine (Local Anaesthetic) Action Pathway                                                    | 31   | 2 (6.5%) | 0.00105  | 0.00209 | SMPDB    |
| Heroin Action Pathway                                                                           | 32   | 2 (6.2%) | 0.00112  | 0.00218 | SMPDB    |
| Codeine Action Pathway                                                                          | 32   | 2 (6.2%) | 0.00112  | 0.00218 | SMPDB    |
| Imipramine Action Pathway                                                                       | 33   | 2 (6.1%) | 0.00119  | 0.0023  | SMPDB    |
| Fluoxetine Action Pathway                                                                       | 34   | 2 (5.9%) | 0.00127  | 0.00242 | SMPDB    |
| Nicotine Action Pathway                                                                         | 36   | 2 (5.6%) | 0.00142  | 0.00264 | SMPDB    |
| Methadone Action Pathway                                                                        | 36   | 2 (5.6%) | 0.00142  | 0.00264 | SMPDB    |
| Citalopram Action Pathway                                                                       | 36   | 2 (5.6%) | 0.00142  | 0.00264 | SMPDB    |
| Metabolism of proteins                                                                          | 1935 | 9 (0.5%) | 0.00149  | 0.00274 | Reactome |
| Aldosterone-regulated sodium reabsorption - Homo sapiens (human)                                | 37   | 2 (5.4%) | 0.0015   | 0.00274 | KEGG     |
| Metabolism of RNA                                                                               | 584  | 5 (0.9%) | 0.00173  | 0.00313 | Reactome |
| Ion homeostasis                                                                                 | 44   | 2 (4.5%) | 0.00212  | 0.00377 | Reactome |
| Morphine Action Pathway                                                                         | 44   | 2 (4.5%) | 0.00212  | 0.00377 | SMPDB    |
| Carbohydrate digestion and absorption - Homo sapiens (human)                                    | 47   | 2 (4.3%) | 0.00241  | 0.00423 | KEGG     |
| Ion transport by P-type ATPases                                                                 | 47   | 2 (4.3%) | 0.00241  | 0.00423 | Reactome |
| Endocrine and other factor-regulated calcium reabsorption - Homo sapiens (human)                | 53   | 2 (3.8%) | 0.00306  | 0.00505 | KEGG     |
| Mineral absorption - Homo sapiens (human)                                                       | 59   | 2 (3.4%) | 0.00377  | 0.00505 | KEGG     |
| Formation of the ternary complex, and subsequently, the 43S complex                             | 59   | 2 (3.4%) | 0.00377  | 0.00505 | Reactome |
| Bopindolol Action Pathway                                                                       | 61   | 2 (3.3%) | 0.00403  | 0.00505 | SMPDB    |
| Timolol Action Pathway                                                                          | 61   | 2 (3.3%) | 0.00403  | 0.00505 | SMPDB    |
| Carteolol Action Pathway                                                                        | 61   | 2 (3.3%) | 0.00403  | 0.00505 | SMPDB    |
| Bevantolol Action Pathway                                                                       | 61   | 2 (3.3%) | 0.00403  | 0.00505 | SMPDB    |
| Practolol Action Pathway                                                                        | 61   | 2 (3.3%) | 0.00403  | 0.00505 | SMPDB    |
| Dobutamine Action Pathway                                                                       | 61   | 2 (3.3%) | 0.00403  | 0.00505 | SMPDB    |
| Isoprenaline Action Pathway                                                                     | 61   | 2 (3.3%) | 0.00403  | 0.00505 | SMPDB    |
| Arbutamine Action Pathway                                                                       | 61   | 2 (3.3%) | 0.00403  | 0.00505 | SMPDB    |
| Levobunolol Action Pathway                                                                      | 61   | 2 (3.3%) | 0.00403  | 0.00505 | SMPDB    |
| Metipranolol Action Pathway                                                                     | 61   | 2 (3.3%) | 0.00403  | 0.00505 | SMPDB    |
| Sotalol Action Pathway                                                                          | 61   | 2 (3.3%) | 0.00403  | 0.00505 | SMPDB    |
| Epinephrine Action Pathway                                                                      | 61   | 2 (3.3%) | 0.00403  | 0.00505 | SMPDB    |
| Betaxolol Action Pathway                                                                        | 61   | 2 (3.3%) | 0.00403  | 0.00505 | SMPDB    |
| Atenolol Action Pathway                                                                         | 61   | 2 (3.3%) | 0.00403  | 0.00505 | SMPDB    |
| Alprenolol Action Pathway                                                                       | 61   | 2 (3.3%) | 0.00403  | 0.00505 | SMPDB    |
| Acebutolol Action Pathway                                                                       | 61   | 2 (3.3%) | 0.00403  | 0.00505 | SMPDB    |
| Propranolol Action Pathway                                                                      | 61   | 2 (3.3%) | 0.00403  | 0.00505 | SMPDB    |
| Pindolol Action Pathway                                                                         | 61   | 2 (3.3%) | 0.00403  | 0.00505 | SMPDB    |
| Penbutolol Action Pathway                                                                       | 61   | 2 (3.3%) | 0.00403  | 0.00505 | SMPDB    |
| Oxprenolol Action Pathway                                                                       | 61   | 2 (3.3%) | 0.00403  | 0.00505 | SMPDB    |
| Metoprolol Action Pathway                                                                       | 61   | 2 (3.3%) | 0.00403  | 0.00505 | SMPDB    |
| Esmolol Action Pathway                                                                          | 61   | 2 (3.3%) | 0.00403  | 0.00505 | SMPDB    |
| Bisoprolol Action Pathway                                                                       | 61   | 2 (3.3%) | 0.00403  | 0.00505 | SMPDB    |
| Bupranolol Action Pathway                                                                       | 61   | 2 (3.3%) | 0.00403  | 0.00505 | SMPDB    |
| Nebivolol Action Pathway                                                                        | 61   | 2 (3.3%) | 0.00403  | 0.00505 | SMPDB    |
| Nadolol Action Pathway                                                                          | 61   | 2 (3.3%) | 0.00403  | 0.00505 | SMPDB    |
| Muscle/Heart Contraction                                                                        | 61   | 2 (3.3%) | 0.00403  | 0.00505 | SMPDB    |
| Diltiazem Action Pathway                                                                        | 61   | 2 (3.3%) | 0.00403  | 0.00505 | SMPDB    |
| Amlodipine Action Pathway                                                                       | 61   | 2 (3.3%) | 0.00403  | 0.00505 | SMPDB    |
| Verapamil Action Pathway                                                                        | 61   | 2 (3.3%) | 0.00403  | 0.00505 | SMPDB    |
| Nitrendipine Action Pathway                                                                     | 61   | 2 (3.3%) | 0.00403  | 0.00505 | SMPDB    |
| Nisoldipine Action Pathway                                                                      | 61   | 2 (3.3%) | 0.00403  | 0.00505 | SMPDB    |
| Nimodipine Action Pathway                                                                       | 61   | 2 (3.3%) | 0.00403  | 0.00505 | SMPDB    |
| Isradipine Action Pathway                                                                       | 61   | 2 (3.3%) | 0.00403  | 0.00505 | SMPDB    |
| Nifedipine Action Pathway                                                                       | 61   | 2 (3.3%) | 0.00403  | 0.00505 | SMPDB    |
| Felodipine Action Pathway                                                                       | 61   | 2 (3.3%) | 0.00403  | 0.00505 | SMPDB    |
| Quinidine Action Pathway                                                                        | 61   | 2 (3.3%) | 0.00403  | 0.00505 | SMPDB    |
| Procainamide (Antiarrhythmic) Action Pathway                                                    | 61   | 2 (3.3%) | 0.00403  | 0.00505 | SMPDB    |
| Disopyramide Action Pathway                                                                     | 61   | 2 (3.3%) | 0.00403  | 0.00505 | SMPDB    |
| Fosphenytoin (Antiarrhythmic) Action Pathway                                                    | 61   | 2 (3.3%) | 0.00403  | 0.00505 | SMPDB    |
| Mexiletine Action Pathway                                                                       | 61   | 2 (3.3%) | 0.00403  | 0.00505 | SMPDB    |
| Tocainide Action Pathway                                                                        | 61   | 2 (3.3%) | 0.00403  | 0.00505 | SMPDB    |
| Flecainide Action Pathway                                                                       | 61   | 2 (3.3%) | 0.00403  | 0.00505 | SMPDB    |
| Amiodarone Action Pathway                                                                       | 61   | 2 (3.3%) | 0.00403  | 0.00505 | SMPDB    |
| Ibutilide Action Pathway                                                                        | 61   | 2 (3.3%) | 0.00403  | 0.00505 | SMPDB    |
| Carvedilol Action Pathway                                                                       | 62   | 2 (3.2%) | 0.00416  | 0.00516 | SMPDB    |
| Labetalol Action Pathway                                                                        | 62   | 2 (3.2%) | 0.00416  | 0.00516 | SMPDB    |
| Lidocaine (Antiarrhythmic) Action Pathway                                                       | 63   | 2 (3.2%) | 0.00429  | 0.00529 | SMPDB    |
| cAMP signaling pathway - Homo sapiens (human)                                                   | 216  | 3 (1.4%) | 0.0044   | 0.0054  | KEGG     |
| Ribosomal scanning and start codon recognition                                                  | 66   | 2 (3.0%) | 0.0047   | 0.00569 | Reactome |
| Translation initiation complex formation                                                        | 66   | 2 (3.0%) | 0.0047   | 0.00569 | Reactome |
| Activation of the mRNA upon binding of the cap-binding complex and eIFs, and subsequent binding | 67   | 2 (3.0%) | 0.00484  | 0.00583 | Reactome |
| Thyroid hormone synthesis - Homo sapiens (human)                                                | 75   | 2 (2.7%) | 0.00603  | 0.00722 | KEGG     |
| Gastric acid secretion - Homo sapiens (human)                                                   | 76   | 2 (2.6%) | 0.00619  | 0.00737 | KEGG     |
| Phenytoin (Antiarrhythmic) Action Pathway                                                       | 82   | 2 (2.4%) | 0.00717  | 0.00849 | SMPDB    |

|                                                   |    |          |         |         |      |
|---------------------------------------------------|----|----------|---------|---------|------|
| Cardiac muscle contraction - Homo sapiens (human) | 87 | 2 (2.3%) | 0.00804 | 0.00947 | KEGG |
| Bile secretion - Homo sapiens (human)             | 90 | 2 (2.2%) | 0.00858 | 0.0101  | KEGG |
| Salivary secretion - Homo sapiens (human)         | 93 | 2 (2.2%) | 0.00914 | 0.0106  | KEGG |

| DOWNREGULATED pathways                                                                | set size | candidates contained | p value  | q value | Pathways database |
|---------------------------------------------------------------------------------------|----------|----------------------|----------|---------|-------------------|
| Miscellaneous transport and binding events                                            | 24       | 7 (29.2%)            | 1.64E-05 | 0.0249  | Reactome          |
| Phenylalanine and tyrosine metabolism                                                 | 13       | 5 (38.5%)            | 6.32E-05 | 0.0481  | Reactome          |
| Tyrosine catabolism                                                                   | 5        | 3 (60.0%)            | 0.000454 | 0.079   | Reactome          |
| tyrosine degradation                                                                  | 5        | 3 (60.0%)            | 0.000454 | 0.079   | HumanCyc          |
| Synthesis of GDP-mannose                                                              | 5        | 3 (60.0%)            | 0.000454 | 0.079   | Reactome          |
| Phenylalanine and Tyrosine Metabolism                                                 | 11       | 4 (36.4%)            | 0.000467 | 0.079   | SMPDB             |
| Phenylketonuria                                                                       | 11       | 4 (36.4%)            | 0.000467 | 0.079   | SMPDB             |
| Tyrosinemia Type 3 (TYRO3)                                                            | 11       | 4 (36.4%)            | 0.000467 | 0.079   | SMPDB             |
| Tyrosinemia Type 2 (or Richner-Hanhart syndrome)                                      | 11       | 4 (36.4%)            | 0.000467 | 0.079   | SMPDB             |
| GDP-mannose biosynthesis                                                              | 6        | 3 (50.0%)            | 0.000883 | 0.134   | HumanCyc          |
| RNA Polymerase I Promoter Opening                                                     | 2        | 2 (100.0%)           | 0.00132  | 0.183   | Reactome          |
| Amino sugar and nucleotide sugar metabolism - Homo sapiens (human)                    | 48       | 7 (14.6%)            | 0.00164  | 0.201   | KEGG              |
| Glycosphingolipid biosynthesis - globo and isoglobo series - Homo sapiens (human)     | 15       | 4 (26.7%)            | 0.00172  | 0.201   | KEGG              |
| Metabolism of RNA                                                                     | 584      | 35 (6.0%)            | 0.00255  | 0.218   | Reactome          |
| Apoptosis-related network due to altered Notch3 in ovarian cancer                     | 53       | 7 (13.2%)            | 0.00293  | 0.218   | Wikipathways      |
| Sepiapterin reductase deficiency                                                      | 9        | 3 (33.3%)            | 0.00342  | 0.218   | SMPDB             |
| Segawa syndrome                                                                       | 9        | 3 (33.3%)            | 0.00342  | 0.218   | SMPDB             |
| Pterine Biosynthesis                                                                  | 9        | 3 (33.3%)            | 0.00342  | 0.218   | SMPDB             |
| Dopa-responsive dystonia                                                              | 9        | 3 (33.3%)            | 0.00342  | 0.218   | SMPDB             |
| Hyperphenylalaninemia due to guanosine triphosphate cyclohydrolase deficiency         | 9        | 3 (33.3%)            | 0.00342  | 0.218   | SMPDB             |
| Hyperphenylalaninemia due to 6-pyruvoyltetrahydropterin synthase deficiency (ptps)    | 9        | 3 (33.3%)            | 0.00342  | 0.218   | SMPDB             |
| Hyperphenylalaninemia due to dhpr-deficiency                                          | 9        | 3 (33.3%)            | 0.00342  | 0.218   | SMPDB             |
| Glycosphingolipid biosynthesis - globoseries                                          | 18       | 4 (22.2%)            | 0.00353  | 0.218   | EHMN              |
| Loss of Nip from mitotic centrosomes                                                  | 70       | 8 (11.4%)            | 0.00379  | 0.218   | Reactome          |
| Loss of proteins required for interphase microtubule organization from the centrosome | 70       | 8 (11.4%)            | 0.00379  | 0.218   | Reactome          |
| Chylomicron clearance                                                                 | 3        | 2 (66.7%)            | 0.00387  | 0.218   | Reactome          |
| Intestinal hexose absorption                                                          | 3        | 2 (66.7%)            | 0.00387  | 0.218   | Reactome          |
| Gene expression (Transcription)                                                       | 1439     | 71 (4.9%)            | 0.00457  | 0.234   | Reactome          |
| Regulation of PLK1 Activity at G2/M Transition                                        | 88       | 9 (10.2%)            | 0.00465  | 0.234   | Reactome          |
| AURKA Activation by TPX2                                                              | 73       | 8 (11.0%)            | 0.00491  | 0.234   | Reactome          |
| TP53 Regulates Transcription of Cell Death Genes                                      | 44       | 6 (13.6%)            | 0.00492  | 0.234   | Reactome          |
| Galactose metabolism                                                                  | 44       | 6 (13.6%)            | 0.00492  | 0.234   | EHMN              |
| Interconversion of nucleotide di- and triphosphates                                   | 32       | 5 (15.6%)            | 0.00559  | 0.258   | Reactome          |
| Autosomal recessive Osteopetrosis pathways                                            | 11       | 3 (27.3%)            | 0.00636  | 0.278   | Wikipathways      |
| Prion disease pathway                                                                 | 33       | 5 (15.2%)            | 0.0064   | 0.278   | Wikipathways      |
| Transcriptional regulation of white adipocyte differentiation                         | 47       | 6 (12.8%)            | 0.00683  | 0.288   | Reactome          |
| Fc-epsilon receptor I signaling in mast cells                                         | 62       | 7 (11.3%)            | 0.00708  | 0.288   | PID               |
| superpathway of pyrimidine deoxyribonucleotides <i>de novo</i> biosynthesis           | 22       | 4 (18.2%)            | 0.00753  | 0.288   | HumanCyc          |
| Intestinal absorption                                                                 | 4        | 2 (50.0%)            | 0.00756  | 0.288   | Reactome          |
| Ceramide signaling pathway                                                            | 48       | 6 (12.5%)            | 0.00757  | 0.288   | PID               |
| TP53 Regulates Transcription of Caspase Activators and Caspases                       | 12       | 3 (25.0%)            | 0.00825  | 0.292   | Reactome          |
| Tetrahydrobiopterin (BH4) synthesis, recycling, salvage and regulation                | 12       | 3 (25.0%)            | 0.00825  | 0.292   | Reactome          |
| Trihydroxycoprostanoyl-CoA beta-oxidation                                             | 12       | 3 (25.0%)            | 0.00825  | 0.292   | EHMN              |
| Anchoring of the basal body to the plasma membrane                                    | 97       | 9 (9.3%)             | 0.00875  | 0.299   | Reactome          |
| Renin-angiotensin system - Homo sapiens (human)                                       | 23       | 4 (17.4%)            | 0.00886  | 0.299   | KEGG              |
| Recruitment of NuMA to mitotic centrosomes                                            | 81       | 8 (9.9%)             | 0.00915  | 0.299   | Reactome          |
| Nuclear import of Rev protein                                                         | 36       | 5 (13.9%)            | 0.00929  | 0.299   | Reactome          |
| Hepatitis B infection                                                                 | 152      | 12 (7.9%)            | 0.00961  | 0.299   | Wikipathways      |
| Recruitment of mitotic centrosome proteins and complexes                              | 82       | 8 (9.8%)             | 0.00982  | 0.299   | Reactome          |
| Centrosome maturation                                                                 | 82       | 8 (9.8%)             | 0.00982  | 0.299   | Reactome          |

**Supplemental Table 4. Selected differentially regulated pathways in the ductal cluster #2 of pregnant NSG-LIRKO mice compared to non-pregnant NSG-Lox mice (Combined model).**

List of selected pathways analyzed by ConsensusPathDB.

The p-value is calculated according to the hypergeometric test based on the number of physical entities present in both the predefined set and user-specified list of physical entities. Reference is cited in Methods.

| <b>UPREGULATED pathways</b>                                                        | <b>set size</b> | <b>candidates contained</b> | <b>p value</b> | <b>q value</b> | <b>Pathways database</b> |
|------------------------------------------------------------------------------------|-----------------|-----------------------------|----------------|----------------|--------------------------|
| Spirolactone Action Pathway                                                        | 33              | 2 (6.1%)                    | 3.50E-05       | 3.86E-05       | SMPDB                    |
| Eplerenone Action Pathway                                                          | 33              | 2 (6.1%)                    | 3.50E-05       | 3.86E-05       | SMPDB                    |
| Triamterene Action Pathway                                                         | 33              | 2 (6.1%)                    | 3.50E-05       | 3.86E-05       | SMPDB                    |
| Amiloride Action Pathway                                                           | 33              | 2 (6.1%)                    | 3.50E-05       | 3.86E-05       | SMPDB                    |
| Torsemide Action Pathway                                                           | 33              | 2 (6.1%)                    | 3.50E-05       | 3.86E-05       | SMPDB                    |
| Iminoglycinuria                                                                    | 33              | 2 (6.1%)                    | 3.50E-05       | 3.86E-05       | SMPDB                    |
| Lysinuric Protein Intolerance                                                      | 33              | 2 (6.1%)                    | 3.50E-05       | 3.86E-05       | SMPDB                    |
| Blue diaper syndrome                                                               | 33              | 2 (6.1%)                    | 3.50E-05       | 3.86E-05       | SMPDB                    |
| Lysinuric protein intolerance (LPI)                                                | 33              | 2 (6.1%)                    | 3.50E-05       | 3.86E-05       | SMPDB                    |
| Cystinuria                                                                         | 33              | 2 (6.1%)                    | 3.50E-05       | 3.86E-05       | SMPDB                    |
| Hartnup Disorder                                                                   | 33              | 2 (6.1%)                    | 3.50E-05       | 3.86E-05       | SMPDB                    |
| Glucose Transporter Defect (SGLT2)                                                 | 33              | 2 (6.1%)                    | 3.50E-05       | 3.86E-05       | SMPDB                    |
| Kidney Function                                                                    | 33              | 2 (6.1%)                    | 3.50E-05       | 3.86E-05       | SMPDB                    |
| Glucose Transporter Defect (SGLT2)                                                 | 33              | 2 (6.1%)                    | 3.50E-05       | 3.86E-05       | SMPDB                    |
| Quinethazone Action Pathway                                                        | 33              | 2 (6.1%)                    | 3.50E-05       | 3.86E-05       | SMPDB                    |
| Bendroflumethiazide Action Pathway                                                 | 33              | 2 (6.1%)                    | 3.50E-05       | 3.86E-05       | SMPDB                    |
| Chlorthalidone Action Pathway                                                      | 33              | 2 (6.1%)                    | 3.50E-05       | 3.86E-05       | SMPDB                    |
| Trichlormethiazide Action Pathway                                                  | 33              | 2 (6.1%)                    | 3.50E-05       | 3.86E-05       | SMPDB                    |
| Indapamide Action Pathway                                                          | 33              | 2 (6.1%)                    | 3.50E-05       | 3.86E-05       | SMPDB                    |
| Metolazone Action Pathway                                                          | 33              | 2 (6.1%)                    | 3.50E-05       | 3.86E-05       | SMPDB                    |
| Hydrochlorothiazide Action Pathway                                                 | 33              | 2 (6.1%)                    | 3.50E-05       | 3.86E-05       | SMPDB                    |
| Cyclothiazide Action Pathway                                                       | 33              | 2 (6.1%)                    | 3.50E-05       | 3.86E-05       | SMPDB                    |
| Hydroflumethiazide Action Pathway                                                  | 33              | 2 (6.1%)                    | 3.50E-05       | 3.86E-05       | SMPDB                    |
| Bumetanide Action Pathway                                                          | 33              | 2 (6.1%)                    | 3.50E-05       | 3.86E-05       | SMPDB                    |
| Ethacrynic Acid Action Pathway                                                     | 33              | 2 (6.1%)                    | 3.50E-05       | 3.86E-05       | SMPDB                    |
| Furosemide Action Pathway                                                          | 33              | 2 (6.1%)                    | 3.50E-05       | 3.86E-05       | SMPDB                    |
| Polythiazide Action Pathway                                                        | 33              | 2 (6.1%)                    | 3.50E-05       | 3.86E-05       | SMPDB                    |
| Methyclothiazide Action Pathway                                                    | 33              | 2 (6.1%)                    | 3.50E-05       | 3.86E-05       | SMPDB                    |
| Chlorthiazide Action Pathway                                                       | 33              | 2 (6.1%)                    | 3.50E-05       | 3.86E-05       | SMPDB                    |
| Proximal tubule transport                                                          | 57              | 2 (3.5%)                    | 0.000106       | 0.000113       | Wikipathways             |
| Protein digestion and absorption - Homo sapiens (human)                            | 103             | 2 (1.9%)                    | 0.000346       | 0.000357       | KEGG                     |
| <b>DOWNGULATED pathways</b>                                                        | <b>set size</b> | <b>candidates contained</b> | <b>p value</b> | <b>q value</b> | <b>Pathways database</b> |
| EGF-EGFR signaling pathway                                                         | 162             | 18 (11.1%)                  | 8.63E-05       | 0.105          | Wikipathways             |
| Cell-cell junction organization                                                    | 64              | 10 (15.6%)                  | 0.000211       | 0.105          | Reactome                 |
| Beta-oxidation of pristanoyl-CoA                                                   | 9               | 4 (44.4%)                   | 0.000273       | 0.105          | Reactome                 |
| Phytanic acid peroxisomal oxidation                                                | 16              | 5 (31.2%)                   | 0.000306       | 0.105          | EHMN                     |
| EGFR1                                                                              | 455             | 34 (7.5%)                   | 0.000341       | 0.105          | NetPath                  |
| Trihydroxycoprostanoyl-CoA beta-oxidation                                          | 12              | 4 (33.3%)                   | 0.000974       | 0.219          | EHMN                     |
| Peroxisomal lipid metabolism                                                       | 30              | 6 (20.0%)                   | 0.00105        | 0.219          | Reactome                 |
| NO metabolism in cystic fibrosis                                                   | 13              | 4 (30.8%)                   | 0.00136        | 0.219          | Wikipathways             |
| Fc gamma R-mediated phagocytosis - Homo sapiens (human)                            | 97              | 11 (11.5%)                  | 0.00155        | 0.219          | KEGG                     |
| RNA Polymerase I Promoter Opening                                                  | 2               | 2 (100.0%)                  | 0.0016         | 0.219          | Reactome                 |
| Notch Signaling                                                                    | 45              | 7 (15.6%)                   | 0.00192        | 0.219          | Wikipathways             |
| SUMO E3 ligases SUMOylate target proteins                                          | 177             | 16 (9.0%)                   | 0.00201        | 0.219          | Reactome                 |
| snRNP Assembly                                                                     | 24              | 5 (20.8%)                   | 0.00228        | 0.219          | Reactome                 |
| Metabolism of non-coding RNA                                                       | 24              | 5 (20.8%)                   | 0.00228        | 0.219          | Reactome                 |
| Notch signaling pathway - Homo sapiens (human)                                     | 59              | 8 (13.6%)                   | 0.0023         | 0.219          | KEGG                     |
| angiotensin ii mediated activation of jnk pathway via pyk2 dependent signaling     | 35              | 6 (17.1%)                   | 0.00242        | 0.219          | BioCarta                 |
| SUMOylation of transcription cofactors                                             | 47              | 7 (14.9%)                   | 0.00248        | 0.219          | Reactome                 |
| SUMOylation                                                                        | 182             | 16 (8.8%)                   | 0.00267        | 0.219          | Reactome                 |
| Fibroblast growth factor-1                                                         | 74              | 9 (12.2%)                   | 0.0027         | 0.219          | NetPath                  |
| Cell junction organization                                                         | 89              | 10 (11.2%)                  | 0.0029         | 0.224          | Reactome                 |
| Fc-epsilon receptor I signaling in mast cells                                      | 62              | 8 (12.9%)                   | 0.00316        | 0.225          | PID                      |
| Tight junction - Homo sapiens (human)                                              | 169             | 15 (8.9%)                   | 0.00327        | 0.225          | KEGG                     |
| mechanism of gene regulation by peroxisome proliferators via ppara                 | 52              | 7 (13.5%)                   | 0.00445        | 0.225          | BioCarta                 |
| Sepiapterin reductase deficiency                                                   | 9               | 3 (33.3%)                   | 0.00448        | 0.225          | SMPDB                    |
| Segawa syndrome                                                                    | 9               | 3 (33.3%)                   | 0.00448        | 0.225          | SMPDB                    |
| Pterine Biosynthesis                                                               | 9               | 3 (33.3%)                   | 0.00448        | 0.225          | SMPDB                    |
| Dopa-responsive dystonia                                                           | 9               | 3 (33.3%)                   | 0.00448        | 0.225          | SMPDB                    |
| Hyperphenylalaninemia due to guanosine triphosphate cyclohydrolase deficiency      | 9               | 3 (33.3%)                   | 0.00448        | 0.225          | SMPDB                    |
| Hyperphenylalaninemia due to 6-pyruvoyltetrahydropterin synthase deficiency (ptps) | 9               | 3 (33.3%)                   | 0.00448        | 0.225          | SMPDB                    |
| Hyperphenylalaninemia due to dhpr-deficiency                                       | 9               | 3 (33.3%)                   | 0.00448        | 0.225          | SMPDB                    |
| One-carbon metabolism                                                              | 28              | 5 (17.9%)                   | 0.00463        | 0.225          | Wikipathways             |
| fatty acid beta-oxidation (unsaturated, odd number)                                | 3               | 2 (66.7%)                   | 0.00468        | 0.225          | HumanCyc                 |
| Axon guidance - Homo sapiens (human)                                               | 182             | 15 (8.2%)                   | 0.00649        | 0.278          | KEGG                     |
| Global Genome Nucleotide Excision Repair (GG-NER)                                  | 70              | 8 (11.4%)                   | 0.00669        | 0.278          | Reactome                 |
| Formation of Incision Complex in GG-NER                                            | 43              | 6 (14.0%)                   | 0.00694        | 0.278          | Reactome                 |
| Adherens junctions interactions                                                    | 31              | 5 (16.1%)                   | 0.00725        | 0.278          | Reactome                 |
| Tight junction interactions                                                        | 31              | 5 (16.1%)                   | 0.00725        | 0.278          | Reactome                 |
| Folate metabolism                                                                  | 31              | 5 (16.1%)                   | 0.00725        | 0.278          | INOH                     |
| One carbon pool by folate - Homo sapiens (human)                                   | 20              | 4 (20.0%)                   | 0.00739        | 0.278          | KEGG                     |
| 3-phosphoinositide degradation                                                     | 20              | 4 (20.0%)                   | 0.00739        | 0.278          | HumanCyc                 |
| S1P1 pathway                                                                       | 20              | 4 (20.0%)                   | 0.00739        | 0.278          | PID                      |
| rho cell motility signaling pathway                                                | 32              | 5 (15.6%)                   | 0.00831        | 0.305          | BioCarta                 |
| Cholesterol biosynthesis via desmosterol                                           | 4               | 2 (50.0%)                   | 0.0091         | 0.318          | Reactome                 |
| Cholesterol biosynthesis via lathosterol                                           | 4               | 2 (50.0%)                   | 0.0091         | 0.318          | Reactome                 |
| IL6                                                                                | 74              | 8 (10.8%)                   | 0.0093         | 0.318          | NetPath                  |
| Prion disease pathway                                                              | 33              | 5 (15.2%)                   | 0.00948        | 0.318          | Wikipathways             |
| ErbB1 downstream signaling                                                         | 106             | 10 (9.4%)                   | 0.00995        | 0.324          | PID                      |

**Supplemental Table 5. Selected differentially regulated pathways in the ductal cluster #4 of pregnant NSG-Lox mice compared to non-pregnant NSG-Lox mice (Pregnancy model).**

List of selected pathways analyzed by ConsensusPathDB.

The p-value is calculated according to the hypergeometric test based on the number of physical entities present in both the predefined set and user-specified list of physical entities. Reference is cited in Methods.

| <b>UPREGULATED pathways</b>                                     | <b>set size</b> | <b>candidates contained</b> | <b>p value</b> | <b>q value</b> | <b>Pathways database</b> |
|-----------------------------------------------------------------|-----------------|-----------------------------|----------------|----------------|--------------------------|
| Cytoplasmic Ribosomal Proteins                                  | 88              | 9 (10.2%)                   | 1.11E-14       | 2.30E-12       | Wikipathways             |
| Peptide chain elongation                                        | 100             | 9 (9.0%)                    | 3.64E-14       | 2.30E-12       | Reactome                 |
| Eukaryotic Translation Termination                              | 103             | 9 (8.7%)                    | 4.79E-14       | 2.30E-12       | Reactome                 |
| Selenocysteine synthesis                                        | 103             | 9 (8.7%)                    | 4.79E-14       | 2.30E-12       | Reactome                 |
| Nonsense Mediated Decay (NMD) independent of the Exon Junc      | 105             | 9 (8.6%)                    | 5.73E-14       | 2.30E-12       | Reactome                 |
| Eukaryotic Translation Elongation                               | 105             | 9 (8.6%)                    | 5.73E-14       | 2.30E-12       | Reactome                 |
| Response of EIF2AK4 (GCN2) to amino acid deficiency             | 111             | 9 (8.1%)                    | 9.58E-14       | 3.30E-12       | Reactome                 |
| Formation of a pool of free 40S subunits                        | 113             | 9 (8.0%)                    | 1.13E-13       | 3.40E-12       | Reactome                 |
| Nonsense Mediated Decay (NMD) enhanced by the Exon Junctio      | 117             | 9 (7.7%)                    | 1.56E-13       | 3.75E-12       | Reactome                 |
| Nonsense-Mediated Decay (NMD)                                   | 117             | 9 (7.7%)                    | 1.56E-13       | 3.75E-12       | Reactome                 |
| SRP-dependent cotranslational protein targeting to membrane     | 123             | 9 (7.3%)                    | 2.47E-13       | 4.92E-12       | Reactome                 |
| L13a-mediated translational silencing of Ceruloplasmin expresio | 123             | 9 (7.3%)                    | 2.47E-13       | 4.92E-12       | Reactome                 |
| GTP hydrolysis and joining of the 60S ribosomal subunit         | 124             | 9 (7.3%)                    | 2.66E-13       | 4.92E-12       | Reactome                 |
| Selenoamino acid metabolism                                     | 128             | 9 (7.0%)                    | 3.56E-13       | 6.12E-12       | Reactome                 |
| Cap-dependent Translation Initiation                            | 131             | 9 (6.9%)                    | 4.40E-13       | 6.62E-12       | Reactome                 |
| Eukaryotic Translation Initiation                               | 131             | 9 (6.9%)                    | 4.40E-13       | 6.62E-12       | Reactome                 |
| Cellular response to starvation                                 | 145             | 9 (6.2%)                    | 1.11E-12       | 1.58E-11       | Reactome                 |
| Ribosome - Homo sapiens (human)                                 | 158             | 9 (5.7%)                    | 2.43E-12       | 3.25E-11       | KEGG                     |
| Coronavirus disease - COVID-19 - Homo sapiens (human)           | 232             | 9 (3.9%)                    | 7.46E-11       | 9.46E-10       | KEGG                     |
| Cellular responses to stress                                    | 554             | 11 (2.0%)                   | 4.49E-10       | 5.42E-09       | Reactome                 |
| Cellular responses to external stimuli                          | 569             | 11 (1.9%)                   | 5.97E-10       | 6.85E-09       | Reactome                 |
| Translation                                                     | 307             | 9 (2.9%)                    | 9.33E-10       | 1.02E-08       | Reactome                 |
| Metabolism of amino acids and derivatives                       | 339             | 9 (2.7%)                    | 2.23E-09       | 2.34E-08       | Reactome                 |
| Pancreatic secretion - Homo sapiens (human)                     | 102             | 6 (5.9%)                    | 1.50E-08       | 1.51E-07       | KEGG                     |
| Metabolism                                                      | 1954            | 15 (0.8%)                   | 3.99E-08       | 3.84E-07       | Reactome                 |
| Metabolism of RNA                                               | 584             | 9 (1.5%)                    | 2.43E-07       | 2.25E-06       | Reactome                 |
| Cardiac muscle contraction - Homo sapiens (human)               | 87              | 5 (5.7%)                    | 3.11E-07       | 2.78E-06       | KEGG                     |
| Digestion                                                       | 22              | 3 (13.6%)                   | 6.61E-06       | 5.69E-05       | Reactome                 |
| Digestion and absorption                                        | 26              | 3 (11.5%)                   | 1.11E-05       | 9.23E-05       | Reactome                 |
| Protein digestion and absorption - Homo sapiens (human)         | 103             | 4 (3.9%)                    | 2.58E-05       | 0.000207       | KEGG                     |
| Digestion of dietary lipid                                      | 7               | 2 (28.6%)                   | 5.86E-05       | 0.000455       | Reactome                 |
| Carbohydrate digestion and absorption - Homo sapiens (human)    | 47              | 3 (6.4%)                    | 6.77E-05       | 0.00051        | KEGG                     |
| Formation of the ternary complex, and subsequently, the 43S con | 59              | 3 (5.1%)                    | 0.000134       | 0.000949       | Reactome                 |
| Mineral absorption - Homo sapiens (human)                       | 59              | 3 (5.1%)                    | 0.000134       | 0.000949       | KEGG                     |
| Lactose Degradation                                             | 11              | 2 (18.2%)                   | 0.000153       | 0.00102        | SMPDB                    |
| Lactose Intolerance                                             | 11              | 2 (18.2%)                   | 0.000153       | 0.00102        | SMPDB                    |
| Cytoprotection by HMOX1                                         | 65              | 3 (4.6%)                    | 0.000179       | 0.00113        | Reactome                 |
| Trehalose Degradation                                           | 12              | 2 (16.7%)                   | 0.000183       | 0.00113        | SMPDB                    |
| Ribosomal scanning and start codon recognition                  | 66              | 3 (4.5%)                    | 0.000187       | 0.00113        | Reactome                 |
| Translation initiation complex formation                        | 66              | 3 (4.5%)                    | 0.000187       | 0.00113        | Reactome                 |
| Activation of the mRNA upon binding of the cap-binding complex  | 67              | 3 (4.5%)                    | 0.000196       | 0.00115        | Reactome                 |
| Neuroinflammation                                               | 14              | 2 (14.3%)                   | 0.000252       | 0.00145        | Wikipathways             |
| Respiratory electron transport                                  | 89              | 3 (3.4%)                    | 0.000452       | 0.00253        | Reactome                 |
| Salivary secretion - Homo sapiens (human)                       | 93              | 3 (3.2%)                    | 0.000514       | 0.00272        | KEGG                     |
| Cellular response to chemical stress                            | 99              | 3 (3.0%)                    | 0.000618       | 0.00272        | Reactome                 |
| PINK1-PRKN Mediated Mitophagy                                   | 22              | 2 (9.1%)                    | 0.000634       | 0.00272        | Reactome                 |
| Electron Transport Chain (OXPHOS system in mitochondria)        | 103             | 3 (2.9%)                    | 0.000693       | 0.00272        | Wikipathways             |
| Proximal tubule bicarbonate reclamation - Homo sapiens (human)  | 23              | 2 (8.7%)                    | 0.000694       | 0.00272        | KEGG                     |
| Parkinson disease - Homo sapiens (human)                        | 249             | 4 (1.6%)                    | 0.000773       | 0.00272        | KEGG                     |
| Respiratory electron transport, ATP synthesis by chemiosmotic c | 113             | 3 (2.7%)                    | 0.000908       | 0.00272        | Reactome                 |
| Levomethadyl Acetate Action Pathway                             | 29              | 2 (6.9%)                    | 0.00111        | 0.00272        | SMPDB                    |
| Levallorphan Action Pathway                                     | 29              | 2 (6.9%)                    | 0.00111        | 0.00272        | SMPDB                    |
| Dimethylthiambutene Action Pathway                              | 29              | 2 (6.9%)                    | 0.00111        | 0.00272        | SMPDB                    |
| Ethylmorphine Action Pathway                                    | 29              | 2 (6.9%)                    | 0.00111        | 0.00272        | SMPDB                    |
| Pentazocine Action Pathway                                      | 29              | 2 (6.9%)                    | 0.00111        | 0.00272        | SMPDB                    |
| Naltrexone Action Pathway                                       | 29              | 2 (6.9%)                    | 0.00111        | 0.00272        | SMPDB                    |
| Buprenorphine Action Pathway                                    | 29              | 2 (6.9%)                    | 0.00111        | 0.00272        | SMPDB                    |
| Alvimopan Action Pathway                                        | 29              | 2 (6.9%)                    | 0.00111        | 0.00272        | SMPDB                    |
| Naloxone Action Pathway                                         | 29              | 2 (6.9%)                    | 0.00111        | 0.00272        | SMPDB                    |
| Dihydromorphine Action Pathway                                  | 29              | 2 (6.9%)                    | 0.00111        | 0.00272        | SMPDB                    |
| Ketobemidone Action Pathway                                     | 29              | 2 (6.9%)                    | 0.00111        | 0.00272        | SMPDB                    |
| Levorphanol Action Pathway                                      | 29              | 2 (6.9%)                    | 0.00111        | 0.00272        | SMPDB                    |
| Propoxyphene Action Pathway                                     | 29              | 2 (6.9%)                    | 0.00111        | 0.00272        | SMPDB                    |
| Tramadol Action Pathway                                         | 29              | 2 (6.9%)                    | 0.00111        | 0.00272        | SMPDB                    |
| Diphenoxylate Action Pathway                                    | 29              | 2 (6.9%)                    | 0.00111        | 0.00272        | SMPDB                    |
| Anileridine Action Pathway                                      | 29              | 2 (6.9%)                    | 0.00111        | 0.00272        | SMPDB                    |
| Oxycodone Action Pathway                                        | 29              | 2 (6.9%)                    | 0.00111        | 0.00272        | SMPDB                    |
| Alfentanil Action Pathway                                       | 29              | 2 (6.9%)                    | 0.00111        | 0.00272        | SMPDB                    |
| Oxymorphone Action Pathway                                      | 29              | 2 (6.9%)                    | 0.00111        | 0.00272        | SMPDB                    |
| Hydrocodone Action Pathway                                      | 29              | 2 (6.9%)                    | 0.00111        | 0.00272        | SMPDB                    |
| Hydromorphone Action Pathway                                    | 29              | 2 (6.9%)                    | 0.00111        | 0.00272        | SMPDB                    |
| Sufentanil Action Pathway                                       | 29              | 2 (6.9%)                    | 0.00111        | 0.00272        | SMPDB                    |
| Remifentanil Action Pathway                                     | 29              | 2 (6.9%)                    | 0.00111        | 0.00272        | SMPDB                    |
| Fentanyl Action Pathway                                         | 29              | 2 (6.9%)                    | 0.00111        | 0.00272        | SMPDB                    |
| Carfentanil Action Pathway                                      | 29              | 2 (6.9%)                    | 0.00111        | 0.00272        | SMPDB                    |
| 3-Methylthiofentanyl Action Pathway                             | 29              | 2 (6.9%)                    | 0.00111        | 0.00272        | SMPDB                    |
| Methadyl Acetate Action Pathway                                 | 29              | 2 (6.9%)                    | 0.00111        | 0.00272        | SMPDB                    |
| Dezocine Action Pathway                                         | 29              | 2 (6.9%)                    | 0.00111        | 0.00272        | SMPDB                    |
| Mepivacaine Action Pathway                                      | 29              | 2 (6.9%)                    | 0.00111        | 0.00272        | SMPDB                    |
| Chlorprocaine Action Pathway                                    | 29              | 2 (6.9%)                    | 0.00111        | 0.00272        | SMPDB                    |
| Dibucaine Action Pathway                                        | 29              | 2 (6.9%)                    | 0.00111        | 0.00272        | SMPDB                    |
| Levobupivacaine Action Pathway                                  | 29              | 2 (6.9%)                    | 0.00111        | 0.00272        | SMPDB                    |
| Benzocaine Action Pathway                                       | 29              | 2 (6.9%)                    | 0.00111        | 0.00272        | SMPDB                    |
| Bupivacaine Action Pathway                                      | 29              | 2 (6.9%)                    | 0.00111        | 0.00272        | SMPDB                    |
| Oxybuprocaine Action Pathway                                    | 29              | 2 (6.9%)                    | 0.00111        | 0.00272        | SMPDB                    |
| Prilocaine Action Pathway                                       | 29              | 2 (6.9%)                    | 0.00111        | 0.00272        | SMPDB                    |

|                                                                 |      |                 |         |         |              |
|-----------------------------------------------------------------|------|-----------------|---------|---------|--------------|
| Procaine Action Pathway                                         | 29   | <u>2 (6.9%)</u> | 0.00111 | 0.00272 | SMPDB        |
| Proparacaine Action Pathway                                     | 29   | <u>2 (6.9%)</u> | 0.00111 | 0.00272 | SMPDB        |
| Ropivacaine Action Pathway                                      | 29   | <u>2 (6.9%)</u> | 0.00111 | 0.00272 | SMPDB        |
| Cocaine Action Pathway                                          | 29   | <u>2 (6.9%)</u> | 0.00111 | 0.00272 | SMPDB        |
| Escitalopram Action Pathway                                     | 29   | <u>2 (6.9%)</u> | 0.00111 | 0.00272 | SMPDB        |
| Nalbuphine Action Pathway                                       | 30   | <u>2 (6.7%)</u> | 0.00118 | 0.00272 | SMPDB        |
| Desipramine Action Pathway                                      | 30   | <u>2 (6.7%)</u> | 0.00118 | 0.00272 | SMPDB        |
| Mitophagy                                                       | 30   | <u>2 (6.7%)</u> | 0.00118 | 0.00272 | Reactome     |
| Lidocaine (Local Anaesthetic) Action Pathway                    | 31   | <u>2 (6.5%)</u> | 0.00127 | 0.00272 | SMPDB        |
| Heroin Action Pathway                                           | 32   | <u>2 (6.2%)</u> | 0.00135 | 0.00272 | SMPDB        |
| Codeine Action Pathway                                          | 32   | <u>2 (6.2%)</u> | 0.00135 | 0.00272 | SMPDB        |
| Spiroglactone Action Pathway                                    | 33   | <u>2 (6.1%)</u> | 0.00143 | 0.00272 | SMPDB        |
| Eplerenone Action Pathway                                       | 33   | <u>2 (6.1%)</u> | 0.00143 | 0.00272 | SMPDB        |
| Triamterene Action Pathway                                      | 33   | <u>2 (6.1%)</u> | 0.00143 | 0.00272 | SMPDB        |
| Amloride Action Pathway                                         | 33   | <u>2 (6.1%)</u> | 0.00143 | 0.00272 | SMPDB        |
| Imipramine Action Pathway                                       | 33   | <u>2 (6.1%)</u> | 0.00143 | 0.00272 | SMPDB        |
| Torseamide Action Pathway                                       | 33   | <u>2 (6.1%)</u> | 0.00143 | 0.00272 | SMPDB        |
| Iminoglycinuria                                                 | 33   | <u>2 (6.1%)</u> | 0.00143 | 0.00272 | SMPDB        |
| Lysinuric Protein Intolerance                                   | 33   | <u>2 (6.1%)</u> | 0.00143 | 0.00272 | SMPDB        |
| Blue diaper syndrome                                            | 33   | <u>2 (6.1%)</u> | 0.00143 | 0.00272 | SMPDB        |
| Lysinuric protein intolerance (LPI)                             | 33   | <u>2 (6.1%)</u> | 0.00143 | 0.00272 | SMPDB        |
| Cystinuria                                                      | 33   | <u>2 (6.1%)</u> | 0.00143 | 0.00272 | SMPDB        |
| Hartnup Disorder                                                | 33   | <u>2 (6.1%)</u> | 0.00143 | 0.00272 | SMPDB        |
| Glucose Transporter Defect (SGLT2)                              | 33   | <u>2 (6.1%)</u> | 0.00143 | 0.00272 | SMPDB        |
| Kidney Function                                                 | 33   | <u>2 (6.1%)</u> | 0.00143 | 0.00272 | SMPDB        |
| Glucose Transporter Defect (SGLT2)                              | 33   | <u>2 (6.1%)</u> | 0.00143 | 0.00272 | SMPDB        |
| Quinethazone Action Pathway                                     | 33   | <u>2 (6.1%)</u> | 0.00143 | 0.00272 | SMPDB        |
| Bendroflumethiazide Action Pathway                              | 33   | <u>2 (6.1%)</u> | 0.00143 | 0.00272 | SMPDB        |
| Chlorthalidone Action Pathway                                   | 33   | <u>2 (6.1%)</u> | 0.00143 | 0.00272 | SMPDB        |
| Trichlormethiazide Action Pathway                               | 33   | <u>2 (6.1%)</u> | 0.00143 | 0.00272 | SMPDB        |
| Indapamide Action Pathway                                       | 33   | <u>2 (6.1%)</u> | 0.00143 | 0.00272 | SMPDB        |
| Metolazone Action Pathway                                       | 33   | <u>2 (6.1%)</u> | 0.00143 | 0.00272 | SMPDB        |
| Hydrochlorothiazide Action Pathway                              | 33   | <u>2 (6.1%)</u> | 0.00143 | 0.00272 | SMPDB        |
| Cyclothiazide Action Pathway                                    | 33   | <u>2 (6.1%)</u> | 0.00143 | 0.00272 | SMPDB        |
| Hydroflumethiazide Action Pathway                               | 33   | <u>2 (6.1%)</u> | 0.00143 | 0.00272 | SMPDB        |
| Bumetanide Action Pathway                                       | 33   | <u>2 (6.1%)</u> | 0.00143 | 0.00272 | SMPDB        |
| Ethacrynic Acid Action Pathway                                  | 33   | <u>2 (6.1%)</u> | 0.00143 | 0.00272 | SMPDB        |
| Furosemide Action Pathway                                       | 33   | <u>2 (6.1%)</u> | 0.00143 | 0.00272 | SMPDB        |
| Polythiazide Action Pathway                                     | 33   | <u>2 (6.1%)</u> | 0.00143 | 0.00272 | SMPDB        |
| Methyclothiazide Action Pathway                                 | 33   | <u>2 (6.1%)</u> | 0.00143 | 0.00272 | SMPDB        |
| Chlorothiazide Action Pathway                                   | 33   | <u>2 (6.1%)</u> | 0.00143 | 0.00272 | SMPDB        |
| Oxidative phosphorylation - Homo sapiens (human)                | 133  | <u>3 (2.3%)</u> | 0.00145 | 0.00274 | KEGG         |
| Fluoxetine Action Pathway                                       | 34   | <u>2 (5.9%)</u> | 0.00152 | 0.00282 | SMPDB        |
| Mitochondrial CIV Assembly                                      | 34   | <u>2 (5.9%)</u> | 0.00152 | 0.00282 | Wikipathways |
| Nicotine Action Pathway                                         | 36   | <u>2 (5.6%)</u> | 0.00171 | 0.00309 | SMPDB        |
| Methadone Action Pathway                                        | 36   | <u>2 (5.6%)</u> | 0.00171 | 0.00309 | SMPDB        |
| Citalopram Action Pathway                                       | 36   | <u>2 (5.6%)</u> | 0.00171 | 0.00309 | SMPDB        |
| Aldosterone-regulated sodium reabsorption - Homo sapiens (hurr) | 37   | <u>2 (5.4%)</u> | 0.0018  | 0.00324 | KEGG         |
| Non-alcoholic fatty liver disease - Homo sapiens (human)        | 150  | <u>3 (2.0%)</u> | 0.00205 | 0.00366 | KEGG         |
| Nonalcoholic fatty liver disease                                | 155  | <u>3 (1.9%)</u> | 0.00225 | 0.00399 | Wikipathways |
| Fat digestion and absorption - Homo sapiens (human)             | 43   | <u>2 (4.7%)</u> | 0.00243 | 0.00427 | KEGG         |
| Ion homeostasis                                                 | 44   | <u>2 (4.5%)</u> | 0.00254 | 0.0044  | Reactome     |
| Morphine Action Pathway                                         | 44   | <u>2 (4.5%)</u> | 0.00254 | 0.0044  | SMPDB        |
| The citric acid (TCA) cycle and respiratory electron transport  | 162  | <u>3 (1.9%)</u> | 0.00255 | 0.0044  | Reactome     |
| Retinoid metabolism and transport                               | 45   | <u>2 (4.4%)</u> | 0.00265 | 0.00454 | Reactome     |
| Ion channel transport                                           | 165  | <u>3 (1.8%)</u> | 0.00269 | 0.00456 | Reactome     |
| Ion transport by P-type ATPases                                 | 47   | <u>2 (4.3%)</u> | 0.00289 | 0.00487 | Reactome     |
| Metabolism of fat-soluble vitamins                              | 49   | <u>2 (4.1%)</u> | 0.00314 | 0.00524 | Reactome     |
| Metabolism of proteins                                          | 1935 | <u>9 (0.5%)</u> | 0.00315 | 0.00524 | Reactome     |
| Metabolism of vitamins and cofactors                            | 180  | <u>3 (1.7%)</u> | 0.00344 | 0.00568 | Reactome     |
| Endocrine and other factor-regulated calcium reabsorption - Hom | 53   | <u>2 (3.8%)</u> | 0.00366 | 0.00593 | KEGG         |
| Proximal tubule transport                                       | 57   | <u>2 (3.5%)</u> | 0.00423 | 0.00593 | Wikipathways |
| Iron uptake and transport                                       | 57   | <u>2 (3.5%)</u> | 0.00423 | 0.00593 | Reactome     |
| Selective autophagy                                             | 59   | <u>2 (3.4%)</u> | 0.00452 | 0.00593 | Reactome     |
| Diabetic cardiomyopathy - Homo sapiens (human)                  | 203  | <u>3 (1.5%)</u> | 0.00482 | 0.00593 | KEGG         |
| Bopindolol Action Pathway                                       | 61   | <u>2 (3.3%)</u> | 0.00483 | 0.00593 | SMPDB        |
| Timolol Action Pathway                                          | 61   | <u>2 (3.3%)</u> | 0.00483 | 0.00593 | SMPDB        |
| Carteolol Action Pathway                                        | 61   | <u>2 (3.3%)</u> | 0.00483 | 0.00593 | SMPDB        |
| Bevantolol Action Pathway                                       | 61   | <u>2 (3.3%)</u> | 0.00483 | 0.00593 | SMPDB        |
| Practolol Action Pathway                                        | 61   | <u>2 (3.3%)</u> | 0.00483 | 0.00593 | SMPDB        |
| Dobutamine Action Pathway                                       | 61   | <u>2 (3.3%)</u> | 0.00483 | 0.00593 | SMPDB        |
| Isoprenaline Action Pathway                                     | 61   | <u>2 (3.3%)</u> | 0.00483 | 0.00593 | SMPDB        |
| Arbutamine Action Pathway                                       | 61   | <u>2 (3.3%)</u> | 0.00483 | 0.00593 | SMPDB        |
| Levobunolol Action Pathway                                      | 61   | <u>2 (3.3%)</u> | 0.00483 | 0.00593 | SMPDB        |
| Metipranolol Action Pathway                                     | 61   | <u>2 (3.3%)</u> | 0.00483 | 0.00593 | SMPDB        |
| Sotalol Action Pathway                                          | 61   | <u>2 (3.3%)</u> | 0.00483 | 0.00593 | SMPDB        |
| Epinephrine Action Pathway                                      | 61   | <u>2 (3.3%)</u> | 0.00483 | 0.00593 | SMPDB        |
| Betaxolol Action Pathway                                        | 61   | <u>2 (3.3%)</u> | 0.00483 | 0.00593 | SMPDB        |
| Atenolol Action Pathway                                         | 61   | <u>2 (3.3%)</u> | 0.00483 | 0.00593 | SMPDB        |
| Alprenolol Action Pathway                                       | 61   | <u>2 (3.3%)</u> | 0.00483 | 0.00593 | SMPDB        |
| Acebutolol Action Pathway                                       | 61   | <u>2 (3.3%)</u> | 0.00483 | 0.00593 | SMPDB        |
| Propranolol Action Pathway                                      | 61   | <u>2 (3.3%)</u> | 0.00483 | 0.00593 | SMPDB        |
| Pindolol Action Pathway                                         | 61   | <u>2 (3.3%)</u> | 0.00483 | 0.00593 | SMPDB        |
| Penbutolol Action Pathway                                       | 61   | <u>2 (3.3%)</u> | 0.00483 | 0.00593 | SMPDB        |
| Oxprenolol Action Pathway                                       | 61   | <u>2 (3.3%)</u> | 0.00483 | 0.00593 | SMPDB        |
| Metoprolol Action Pathway                                       | 61   | <u>2 (3.3%)</u> | 0.00483 | 0.00593 | SMPDB        |
| Esmolol Action Pathway                                          | 61   | <u>2 (3.3%)</u> | 0.00483 | 0.00593 | SMPDB        |
| Bisoprolol Action Pathway                                       | 61   | <u>2 (3.3%)</u> | 0.00483 | 0.00593 | SMPDB        |
| Bupranolol Action Pathway                                       | 61   | <u>2 (3.3%)</u> | 0.00483 | 0.00593 | SMPDB        |
| Nebivolol Action Pathway                                        | 61   | <u>2 (3.3%)</u> | 0.00483 | 0.00593 | SMPDB        |
| Nadolol Action Pathway                                          | 61   | <u>2 (3.3%)</u> | 0.00483 | 0.00593 | SMPDB        |
| Muscle/Heart Contraction                                        | 61   | <u>2 (3.3%)</u> | 0.00483 | 0.00593 | SMPDB        |
| Diltiazem Action Pathway                                        | 61   | <u>2 (3.3%)</u> | 0.00483 | 0.00593 | SMPDB        |

|                                                                          |            |                 |         |         |          |
|--------------------------------------------------------------------------|------------|-----------------|---------|---------|----------|
| Amlodipine Action Pathway                                                | <u>61</u>  | <u>2 (3.3%)</u> | 0.00483 | 0.00593 | SMPDB    |
| Verapamil Action Pathway                                                 | <u>61</u>  | <u>2 (3.3%)</u> | 0.00483 | 0.00593 | SMPDB    |
| Nitrendipine Action Pathway                                              | <u>61</u>  | <u>2 (3.3%)</u> | 0.00483 | 0.00593 | SMPDB    |
| Nisoldipine Action Pathway                                               | <u>61</u>  | <u>2 (3.3%)</u> | 0.00483 | 0.00593 | SMPDB    |
| Nimodipine Action Pathway                                                | <u>61</u>  | <u>2 (3.3%)</u> | 0.00483 | 0.00593 | SMPDB    |
| Isradipine Action Pathway                                                | <u>61</u>  | <u>2 (3.3%)</u> | 0.00483 | 0.00593 | SMPDB    |
| Nifedipine Action Pathway                                                | <u>61</u>  | <u>2 (3.3%)</u> | 0.00483 | 0.00593 | SMPDB    |
| Felodipine Action Pathway                                                | <u>61</u>  | <u>2 (3.3%)</u> | 0.00483 | 0.00593 | SMPDB    |
| Quinidine Action Pathway                                                 | <u>61</u>  | <u>2 (3.3%)</u> | 0.00483 | 0.00593 | SMPDB    |
| Procainamide (Antiarrhythmic) Action Pathway                             | <u>61</u>  | <u>2 (3.3%)</u> | 0.00483 | 0.00593 | SMPDB    |
| Disopyramide Action Pathway                                              | <u>61</u>  | <u>2 (3.3%)</u> | 0.00483 | 0.00593 | SMPDB    |
| Fosphenytoin (Antiarrhythmic) Action Pathway                             | <u>61</u>  | <u>2 (3.3%)</u> | 0.00483 | 0.00593 | SMPDB    |
| Mexiletine Action Pathway                                                | <u>61</u>  | <u>2 (3.3%)</u> | 0.00483 | 0.00593 | SMPDB    |
| Tocainide Action Pathway                                                 | <u>61</u>  | <u>2 (3.3%)</u> | 0.00483 | 0.00593 | SMPDB    |
| Flecainide Action Pathway                                                | <u>61</u>  | <u>2 (3.3%)</u> | 0.00483 | 0.00593 | SMPDB    |
| Amiodarone Action Pathway                                                | <u>61</u>  | <u>2 (3.3%)</u> | 0.00483 | 0.00593 | SMPDB    |
| Ibutilide Action Pathway                                                 | <u>61</u>  | <u>2 (3.3%)</u> | 0.00483 | 0.00593 | SMPDB    |
| Carvedilol Action Pathway                                                | <u>62</u>  | <u>2 (3.2%)</u> | 0.00498 | 0.00606 | SMPDB    |
| Labetalol Action Pathway                                                 | <u>62</u>  | <u>2 (3.2%)</u> | 0.00498 | 0.00606 | SMPDB    |
| Lidocaine (Antiarrhythmic) Action Pathway                                | <u>63</u>  | <u>2 (3.2%)</u> | 0.00514 | 0.00622 | SMPDB    |
| Mitophagy - animal - Homo sapiens (human)                                | <u>68</u>  | <u>2 (2.9%)</u> | 0.00596 | 0.00719 | KEGG     |
| Thermogenesis - Homo sapiens (human)                                     | <u>232</u> | <u>3 (1.3%)</u> | 0.00698 | 0.00836 | KEGG     |
| Thyroid hormone synthesis - Homo sapiens (human)                         | <u>75</u>  | <u>2 (2.7%)</u> | 0.00721 | 0.0086  | KEGG     |
| TP53 Regulates Metabolic Genes                                           | <u>76</u>  | <u>2 (2.6%)</u> | 0.0074  | 0.00878 | Reactome |
| Pathways of neurodegeneration - multiple diseases - Homo sapiens (human) | <u>475</u> | <u>4 (0.8%)</u> | 0.00801 | 0.00946 | KEGG     |
| Potential therapeutics for SARS                                          | <u>80</u>  | <u>2 (2.5%)</u> | 0.00817 | 0.00961 | Reactome |
| Phenytoin (Antiarrhythmic) Action Pathway                                | <u>82</u>  | <u>2 (2.4%)</u> | 0.00857 | 0.01    | SMPDB    |
| Insulin secretion - Homo sapiens (human)                                 | <u>86</u>  | <u>2 (2.3%)</u> | 0.00939 | 0.0109  | KEGG     |

| <b>DOWNREGULATED pathways</b>                                 | <b>set size</b> | <b>candidates contained</b> | <b>p value</b> | <b>q value</b> | <b>Pathways database</b> |
|---------------------------------------------------------------|-----------------|-----------------------------|----------------|----------------|--------------------------|
| PAR1-mediated thrombin signaling events                       | <u>43</u>       | <u>7 (16.3%)</u>            | 0.000196       | 0.228          | PID                      |
| Phospholipase D signaling pathway - Homo sapiens (human)      | <u>148</u>      | <u>12 (8.2%)</u>            | 0.00105        | 0.457          | KEGG                     |
| Bacterial invasion of epithelial cells - Homo sapiens (human) | <u>77</u>       | <u>8 (10.4%)</u>            | 0.00156        | 0.457          | KEGG                     |
| GnRH secretion - Homo sapiens (human)                         | <u>64</u>       | <u>7 (10.9%)</u>            | 0.00226        | 0.457          | KEGG                     |
| Spinocerebellar ataxia - Homo sapiens (human)                 | <u>143</u>      | <u>11 (7.7%)</u>            | 0.00268        | 0.457          | KEGG                     |
| PKC-gamma calcium signaling pathway in ataxia                 | <u>22</u>       | <u>4 (18.2%)</u>            | 0.0032         | 0.457          | WikiPathways             |
| superpathway of inositol phosphate compounds                  | <u>70</u>       | <u>7 (10.0%)</u>            | 0.00377        | 0.457          | HumanCyc                 |
| IL1 and megakaryocytes in obesity                             | <u>24</u>       | <u>4 (16.7%)</u>            | 0.00444        | 0.457          | WikiPathways             |
| pyrimidine deoxyribonucleosides degradation                   | <u>4</u>        | <u>2 (50.0%)</u>            | 0.00471        | 0.457          | HumanCyc                 |
| Kisspeptin-kisspeptin receptor system in the ovary            | <u>39</u>       | <u>5 (12.8%)</u>            | 0.00481        | 0.457          | WikiPathways             |
| Shigellosis - Homo sapiens (human)                            | <u>246</u>      | <u>15 (6.1%)</u>            | 0.00482        | 0.457          | KEGG                     |
| NOTCH3 Activation and Transmission of Signal to the Nucleus   | <u>25</u>       | <u>4 (16.0%)</u>            | 0.00517        | 0.457          | Reactome                 |
| fosb gene expression and drug abuse                           | <u>5</u>        | <u>2 (40.0%)</u>            | 0.0077         | 0.457          | BioCarta                 |
| IL8- and CXCR1-mediated signaling events                      | <u>28</u>       | <u>4 (14.3%)</u>            | 0.00782        | 0.457          | PID                      |
| GPR40 Pathway                                                 | <u>15</u>       | <u>3 (20.0%)</u>            | 0.00816        | 0.457          | WikiPathways             |
| Chagas disease - Homo sapiens (human)                         | <u>102</u>      | <u>8 (7.8%)</u>             | 0.0088         | 0.457          | KEGG                     |
| Synthesis of IP3 and IP4 in the cytosol                       | <u>29</u>       | <u>4 (13.8%)</u>            | 0.00887        | 0.457          | Reactome                 |
| mRNA decay by 3, to 5, exonuclease                            | <u>16</u>       | <u>3 (18.8%)</u>            | 0.00984        | 0.457          | Reactome                 |
| Cell-extracellular matrix interactions                        | <u>16</u>       | <u>3 (18.8%)</u>            | 0.00984        | 0.457          | Reactome                 |

**Supplemental Table 6. Selected differentially regulated pathways in the ductal cluster #4 of non-pregnant NSG-LIRKO mice compared to non-pregnant NSG-Lox mice (Insulin Resistant model).**

List of selected pathways analyzed by ConsensusPathDB.

The p-value is calculated according to the hypergeometric test based on the number of physical entities present in both the predefined set and user-specified list of physical entities. Reference is cited in Methods.

| <b>UPREGULATED pathways</b>                                                  | <b>set size</b> | <b>candidates contained</b> | <b>p value</b> | <b>q value</b> | <b>Pathways database</b> |
|------------------------------------------------------------------------------|-----------------|-----------------------------|----------------|----------------|--------------------------|
| Cytoplasmic Ribosomal Proteins                                               | <u>88</u>       | <u>3 (3.4%)</u>             | 7.41E-05       | 0.000513       | Wikipathways             |
| Peptide chain elongation                                                     | <u>100</u>      | <u>3 (3.0%)</u>             | 0.000108       | 0.000513       | Reactome                 |
| Eukaryotic Translation Termination                                           | <u>103</u>      | <u>3 (2.9%)</u>             | 0.000118       | 0.000513       | Reactome                 |
| Selenocysteine synthesis                                                     | <u>103</u>      | <u>3 (2.9%)</u>             | 0.000118       | 0.000513       | Reactome                 |
| Nonsense Mediated Decay (NMD) independent of the Exon Junction Complex (EJC) | <u>105</u>      | <u>3 (2.9%)</u>             | 0.000125       | 0.000513       | Reactome                 |
| Eukaryotic Translation Elongation                                            | <u>105</u>      | <u>3 (2.9%)</u>             | 0.000125       | 0.000513       | Reactome                 |
| Response of EIF2AK4 (GCN2) to amino acid deficiency                          | <u>111</u>      | <u>3 (2.7%)</u>             | 0.000148       | 0.000513       | Reactome                 |
| Formation of a pool of free 40S subunits                                     | <u>113</u>      | <u>3 (2.7%)</u>             | 0.000156       | 0.000513       | Reactome                 |
| Nonsense Mediated Decay (NMD) enhanced by the Exon Junction Complex (EJC)    | <u>117</u>      | <u>3 (2.6%)</u>             | 0.000173       | 0.000513       | Reactome                 |
| Nonsense-Mediated Decay (NMD)                                                | <u>117</u>      | <u>3 (2.6%)</u>             | 0.000173       | 0.000513       | Reactome                 |
| L13a-mediated translational silencing of Ceruloplasmin expression            | <u>123</u>      | <u>3 (2.4%)</u>             | 0.0002         | 0.000513       | Reactome                 |
| SRP-dependent cotranslational protein targeting to membrane                  | <u>123</u>      | <u>3 (2.4%)</u>             | 0.0002         | 0.000513       | Reactome                 |
| GTP hydrolysis and joining of the 60S ribosomal subunit                      | <u>124</u>      | <u>3 (2.4%)</u>             | 0.000205       | 0.000513       | Reactome                 |
| Selenoamino acid metabolism                                                  | <u>128</u>      | <u>3 (2.3%)</u>             | 0.000225       | 0.000513       | Reactome                 |
| Cap-dependent Translation Initiation                                         | <u>131</u>      | <u>3 (2.3%)</u>             | 0.000241       | 0.000513       | Reactome                 |
| Eukaryotic Translation Initiation                                            | <u>131</u>      | <u>3 (2.3%)</u>             | 0.000241       | 0.000513       | Reactome                 |
| Cellular response to starvation                                              | <u>145</u>      | <u>3 (2.1%)</u>             | 0.000325       | 0.000651       | Reactome                 |
| Ribosome - Homo sapiens (human)                                              | <u>158</u>      | <u>3 (1.9%)</u>             | 0.000419       | 0.000791       | KEGG                     |
| Metabolism                                                                   | <u>1954</u>     | <u>7 (0.4%)</u>             | 0.00104        | 0.00185        | Reactome                 |
| Coronavirus disease - COVID-19 - Homo sapiens (human)                        | <u>232</u>      | <u>3 (1.3%)</u>             | 0.00126        | 0.00215        | KEGG                     |
| Metabolism of RNA                                                            | <u>584</u>      | <u>4 (0.7%)</u>             | 0.00183        | 0.00297        | Reactome                 |
| Translation                                                                  | <u>307</u>      | <u>3 (1.0%)</u>             | 0.00285        | 0.00441        | Reactome                 |
| Metabolism of amino acids and derivatives                                    | <u>339</u>      | <u>3 (0.9%)</u>             | 0.00377        | 0.00558        | Reactome                 |

| <b>DOWNGULATED pathways</b>                                                 | <b>set size</b> | <b>candidates contained</b> | <b>p value</b> | <b>q value</b> | <b>Pathways database</b> |
|-----------------------------------------------------------------------------|-----------------|-----------------------------|----------------|----------------|--------------------------|
| Mitochondrial translation initiation                                        | <u>88</u>       | <u>6 (6.8%)</u>             | 3.62E-05       | 0.00463        | Reactome                 |
| Mitochondrial translation                                                   | <u>94</u>       | <u>6 (6.4%)</u>             | 5.26E-05       | 0.00463        | Reactome                 |
| Translation                                                                 | <u>307</u>      | <u>10 (3.3%)</u>            | 6.09E-05       | 0.00463        | Reactome                 |
| TNFalpha                                                                    | <u>234</u>      | <u>8 (3.4%)</u>             | 0.000248       | 0.0142         | NetPath                  |
| Mitochondrial translation termination                                       | <u>88</u>       | <u>5 (5.7%)</u>             | 0.000392       | 0.0149         | Reactome                 |
| Mitochondrial translation elongation                                        | <u>88</u>       | <u>5 (5.7%)</u>             | 0.000392       | 0.0149         | Reactome                 |
| Insertion of tail-anchored proteins into the endoplasmic reticulum membrane | <u>22</u>       | <u>3 (13.6%)</u>            | 0.000479       | 0.0156         | Reactome                 |
| Glycerophospholipid catabolism                                              | <u>7</u>        | <u>2 (28.6%)</u>            | 0.00102        | 0.0289         | Reactome                 |
| SEMA3A-Plexin repulsion signaling by inhibiting Integrin adhesion           | <u>14</u>       | <u>2 (14.3%)</u>            | 0.00426        | 0.108          | Reactome                 |
| TGF-beta super family signaling pathway canonical                           | <u>115</u>      | <u>4 (3.5%)</u>             | 0.00893        | 0.204          | INOH                     |

**Supplemental Table 7. Selected differentially regulated pathways in the ductal cluster #4 of non-pregnant NSG-LIRKO mice compared to non-pregnant NSG-Lox mice (Combined model).**

List of selected pathways analyzed by ConsensusPathDB.

The p-value is calculated according to the hypergeometric test based on the number of physical entities present in both the predefined set and user-specified list of physical entities. Reference is cited in Methods.

| <b>UPREGULATED pathways</b>                             | <b>set size</b> | <b>candidates contained</b> | <b>p value</b> | <b>q value</b> | <b>Pathways database</b> |
|---------------------------------------------------------|-----------------|-----------------------------|----------------|----------------|--------------------------|
| Pancreatic secretion - Homo sapiens (human)             | <u>102</u>      | <u>4 (3.9%)</u>             | 3.83E-07       | 5.75E-06       | KEGG                     |
| Digestion of dietary lipid                              | <u>7</u>        | <u>2 (28.6%)</u>            | 8.36E-06       | 6.27E-05       | Reactome                 |
| Protein digestion and absorption - Homo sapiens (human) | <u>103</u>      | <u>3 (2.9%)</u>             | 3.56E-05       | 0.000178       | KEGG                     |
| Digestion                                               | <u>22</u>       | <u>2 (9.1%)</u>             | 9.15E-05       | 0.000343       | Reactome                 |
| Digestion and absorption                                | <u>26</u>       | <u>2 (7.7%)</u>             | 0.000129       | 0.000386       | Reactome                 |
| Metabolism of vitamins and cofactors                    | <u>180</u>      | <u>3 (1.7%)</u>             | 0.000187       | 0.000468       | Reactome                 |
| Type II interferon signaling (IFNG)                     | <u>37</u>       | <u>2 (5.4%)</u>             | 0.000263       | 0.000563       | WikiPathways             |
| Fat digestion and absorption - Homo sapiens (human)     | <u>43</u>       | <u>2 (4.7%)</u>             | 0.000355       | 0.000649       | KEGG                     |
| Retinoid metabolism and transport                       | <u>45</u>       | <u>2 (4.4%)</u>             | 0.000389       | 0.000649       | Reactome                 |
| Metabolism of fat-soluble vitamins                      | <u>49</u>       | <u>2 (4.1%)</u>             | 0.000462       | 0.000692       | Reactome                 |
| Salivary secretion - Homo sapiens (human)               | <u>93</u>       | <u>2 (2.2%)</u>             | 0.00165        | 0.00226        | KEGG                     |
| Visual phototransduction                                | <u>103</u>      | <u>2 (1.9%)</u>             | 0.00202        | 0.00253        | Reactome                 |

| <b>DOWNGLATED pathways</b>                                                   | <b>set size</b> | <b>candidates contained</b> | <b>p value</b> | <b>q value</b> | <b>Pathways database</b> |
|------------------------------------------------------------------------------|-----------------|-----------------------------|----------------|----------------|--------------------------|
| Cori Cycle                                                                   | <u>16</u>       | <u>3 (18.8%)</u>            | 0.00012        | 0.0283         | WikiPathways             |
| Diabetic cardiomyopathy - Homo sapiens (human)                               | <u>203</u>      | <u>7 (3.4%)</u>             | 0.000255       | 0.0283         | KEGG                     |
| Peptide chain elongation                                                     | <u>100</u>      | <u>5 (5.0%)</u>             | 0.000379       | 0.0283         | Reactome                 |
| Eukaryotic Translation Elongation                                            | <u>105</u>      | <u>5 (4.8%)</u>             | 0.000475       | 0.0283         | Reactome                 |
| Translation                                                                  | <u>307</u>      | <u>8 (2.6%)</u>             | 0.000606       | 0.0283         | Reactome                 |
| Formation of a pool of free 40S subunits                                     | <u>113</u>      | <u>5 (4.4%)</u>             | 0.000664       | 0.0283         | Reactome                 |
| Glycolysis in senescence                                                     | <u>7</u>        | <u>2 (28.6%)</u>            | 0.000776       | 0.0283         | WikiPathways             |
| SRP-dependent cotranslational protein targeting to membrane                  | <u>123</u>      | <u>5 (4.1%)</u>             | 0.000974       | 0.0283         | Reactome                 |
| L13a-mediated translational silencing of Ceruloplasmin expression            | <u>123</u>      | <u>5 (4.1%)</u>             | 0.000974       | 0.0283         | Reactome                 |
| GTP hydrolysis and joining of the 60S ribosomal subunit                      | <u>124</u>      | <u>5 (4.0%)</u>             | 0.00101        | 0.0283         | Reactome                 |
| Cap-dependent Translation Initiation                                         | <u>131</u>      | <u>5 (3.8%)</u>             | 0.00129        | 0.0296         | Reactome                 |
| Eukaryotic Translation Initiation                                            | <u>131</u>      | <u>5 (3.8%)</u>             | 0.00129        | 0.0296         | Reactome                 |
| VEGFA-VEGFR2 Signaling Pathway                                               | <u>433</u>      | <u>9 (2.1%)</u>             | 0.00138        | 0.0296         | WikiPathways             |
| Insulin secretion - Homo sapiens (human)                                     | <u>86</u>       | <u>4 (4.7%)</u>             | 0.00196        | 0.0392         | KEGG                     |
| Cytoplasmic Ribosomal Proteins                                               | <u>88</u>       | <u>4 (4.5%)</u>             | 0.00213        | 0.0398         | WikiPathways             |
| PAR1-mediated thrombin signaling events                                      | <u>43</u>       | <u>3 (7.0%)</u>             | 0.00235        | 0.0411         | PID                      |
| Neurodegeneration with brain iron accumulation (NBIA) subtypes pathway       | <u>44</u>       | <u>3 (6.8%)</u>             | 0.00251        | 0.0413         | WikiPathways             |
| Ribosome - Homo sapiens (human)                                              | <u>158</u>      | <u>5 (3.2%)</u>             | 0.00293        | 0.0456         | KEGG                     |
| Inflammatory mediator regulation of TRP channels - Homo sapiens (human)      | <u>98</u>       | <u>4 (4.1%)</u>             | 0.00315        | 0.0464         | KEGG                     |
| Eukaryotic Translation Termination                                           | <u>103</u>      | <u>4 (3.9%)</u>             | 0.00377        | 0.0487         | Reactome                 |
| Selenocysteine synthesis                                                     | <u>103</u>      | <u>4 (3.9%)</u>             | 0.00377        | 0.0487         | Reactome                 |
| Synaptic Vesicle Pathway                                                     | <u>51</u>       | <u>3 (5.9%)</u>             | 0.00383        | 0.0487         | WikiPathways             |
| Nonsense Mediated Decay (NMD) independent of the Exon Junction Complex       | <u>105</u>      | <u>4 (3.8%)</u>             | 0.00404        | 0.0491         | Reactome                 |
| control of skeletal myogenesis by hdac and calcium/calmodulin-dependent kin  | <u>16</u>       | <u>2 (12.5%)</u>            | 0.00428        | 0.0499         | BioCarta                 |
| HIF-1 signaling pathway - Homo sapiens (human)                               | <u>109</u>      | <u>4 (3.7%)</u>             | 0.00461        | 0.051          | KEGG                     |
| endocytotic role of ndk phosphins and dynamin                                | <u>17</u>       | <u>2 (11.8%)</u>            | 0.00483        | 0.051          | BioCarta                 |
| Response of EIF2AK4 (GCN2) to amino acid deficiency                          | <u>111</u>      | <u>4 (3.6%)</u>             | 0.00492        | 0.051          | Reactome                 |
| Complex I biogenesis                                                         | <u>57</u>       | <u>3 (5.3%)</u>             | 0.00523        | 0.0523         | Reactome                 |
| Formation of the ternary complex, and subsequently, the 43S complex          | <u>59</u>       | <u>3 (5.1%)</u>             | 0.00576        | 0.0535         | Reactome                 |
| Nonsense Mediated Decay (NMD) enhanced by the Exon Junction Complex (I       | <u>117</u>      | <u>4 (3.4%)</u>             | 0.00592        | 0.0535         | Reactome                 |
| Nonsense-Mediated Decay (NMD)                                                | <u>117</u>      | <u>4 (3.4%)</u>             | 0.00592        | 0.0535         | Reactome                 |
| Metabolism                                                                   | <u>1954</u>     | <u>21 (1.1%)</u>            | 0.00669        | 0.0586         | Reactome                 |
| regulation of pgc-1a                                                         | <u>21</u>       | <u>2 (9.5%)</u>             | 0.00734        | 0.0589         | BioCarta                 |
| pkc-catalyzed phosphorylation of inhibitory phosphoprotein of myosin phospho | <u>21</u>       | <u>2 (9.5%)</u>             | 0.00734        | 0.0589         | BioCarta                 |
| Ribosomal scanning and start codon recognition                               | <u>66</u>       | <u>3 (4.5%)</u>             | 0.00787        | 0.0589         | Reactome                 |
| Translation initiation complex formation                                     | <u>66</u>       | <u>3 (4.5%)</u>             | 0.00787        | 0.0589         | Reactome                 |
| Chaperone Mediated Autophagy                                                 | <u>22</u>       | <u>2 (9.1%)</u>             | 0.00804        | 0.0589         | Reactome                 |
| Selenoamino acid metabolism                                                  | <u>128</u>      | <u>4 (3.1%)</u>             | 0.00809        | 0.0589         | Reactome                 |
| Activation of the mRNA upon binding of the cap-binding complex and eIFs, an  | <u>67</u>       | <u>3 (4.5%)</u>             | 0.0082         | 0.0589         | Reactome                 |
| Sphingolipid Metabolism (general overview)                                   | <u>23</u>       | <u>2 (8.7%)</u>             | 0.00877        | 0.0614         | WikiPathways             |
| Ephrin B reverse signaling                                                   | <u>24</u>       | <u>2 (8.3%)</u>             | 0.00953        | 0.0635         | PID                      |
| Sphingolipid Metabolism (integrated pathway)                                 | <u>24</u>       | <u>2 (8.3%)</u>             | 0.00953        | 0.0635         | WikiPathways             |

**Supplemental Table 8. Selected differentially regulated pathways in type 2 diabetic human beta cells compared to non-diabetic cases (Public Available dataset, GSE81608)**

List of selected pathways analyzed by ConsensusPathDB.

The p-value is calculated according to the hypergeometric test based on the number of physical entities present in both the predefined set and user-specified list of physical entities. Reference is cited in Methods.

| <b>UPREGULATED pathways</b>                                                                               | <b>p value</b> | <b>set size</b> | <b>candidates</b> | <b>q value</b> | <b>Pathways database</b> |
|-----------------------------------------------------------------------------------------------------------|----------------|-----------------|-------------------|----------------|--------------------------|
| Translation                                                                                               | 1.59E-13       | 310             | 108 (35.2%)       | 3.50E-10       | Reactome                 |
| Metabolism of proteins                                                                                    | 1.08E-12       | 2008            | 471 (23.6%)       | 1.19E-09       | Reactome                 |
| Metabolism of RNA                                                                                         | 1.07E-11       | 586             | 169 (28.9%)       | 7.85E-09       | Reactome                 |
| SRP-dependent cotranslational protein targeting to membrane                                               | 5.72E-11       | 124             | 53 (43.1%)        | 3.14E-08       | Reactome                 |
| Gene expression (Transcription)                                                                           | 1.57E-10       | 1373            | 331 (24.3%)       | 5.77E-08       | Reactome                 |
| L13a-mediated translational silencing of Ceruloplasmin expression                                         | 2.02E-10       | 125             | 52 (42.3%)        | 5.77E-08       | Reactome                 |
| Nonsense Mediated Decay (NMD) enhanced by the Exon Junction Complex (EJC)                                 | 2.84E-10       | 118             | 50 (42.7%)        | 5.77E-08       | Reactome                 |
| Nonsense-Mediated Decay (NMD)                                                                             | 2.84E-10       | 118             | 50 (42.7%)        | 5.77E-08       | Reactome                 |
| Cap-dependent Translation Initiation                                                                      | 2.85E-10       | 133             | 54 (41.2%)        | 5.77E-08       | Reactome                 |
| Eukaryotic Translation Initiation                                                                         | 2.85E-10       | 133             | 54 (41.2%)        | 5.77E-08       | Reactome                 |
| GTP hydrolysis and joining of the 60S ribosomal subunit                                                   | 2.89E-10       | 126             | 52 (41.9%)        | 5.77E-08       | Reactome                 |
| Formation of a pool of free 40S subunits                                                                  | 8.24E-10       | 115             | 48 (42.5%)        | 1.51E-07       | Reactome                 |
| Peptide chain elongation                                                                                  | 1.08E-09       | 101             | 44 (44.0%)        | 1.82E-07       | Reactome                 |
| RNA Polymerase II Transcription                                                                           | 1.53E-09       | 1236            | 298 (24.3%)       | 2.39E-07       | Reactome                 |
| Nonsense Mediated Decay (NMD) independent of the Exon Junction Complex (EJC)                              | 1.96E-09       | 106             | 45 (42.9%)        | 2.87E-07       | Reactome                 |
| Eukaryotic Translation Elongation                                                                         | 6.86E-09       | 106             | 44 (41.9%)        | 9.42E-07       | Reactome                 |
| Eukaryotic Translation Termination                                                                        | 1.16E-08       | 104             | 43 (41.7%)        | 1.42E-06       | Reactome                 |
| Selenocysteine synthesis                                                                                  | 1.16E-08       | 104             | 43 (41.7%)        | 1.42E-06       | Reactome                 |
| Cytoplasmic Ribosomal Proteins                                                                            | 2.73E-08       | 88              | 38 (43.2%)        | 3.16E-06       | Wikipathways             |
| Selenoamino acid metabolism                                                                               | 4.51E-08       | 130             | 49 (38.0%)        | 4.95E-06       | Reactome                 |
| Protein processing in endoplasmic reticulum - Homo sapiens (human)                                        | 6.98E-08       | 165             | 58 (35.2%)        | 7.30E-06       | KEGG                     |
| Generic Transcription Pathway                                                                             | 2.13E-07       | 1107            | 260 (23.7%)       | 2.13E-05       | Reactome                 |
| RNA transport - Homo sapiens (human)                                                                      | 2.84E-07       | 171             | 58 (33.9%)        | 2.71E-05       | KEGG                     |
| Class I MHC mediated antigen processing & presentation                                                    | 3.41E-07       | 324             | 94 (29.1%)        | 3.12E-05       | Reactome                 |
| Respiratory electron transport, ATP synthesis by chemiosmotic coupling, and heat production by uncoupling | 5.54E-07       | 123             | 45 (36.6%)        | 4.87E-05       | Reactome                 |
| ER to Golgi Anterograde Transport                                                                         | 1.02E-06       | 137             | 48 (35.0%)        | 8.64E-05       | Reactome                 |
| Antigen Presentation: Folding, assembly and peptide loading of class I MHC                                | 1.45E-06       | 24              | 15 (62.5%)        | 0.000118       | Reactome                 |
| Neddylaton                                                                                                | 1.78E-06       | 235             | 71 (30.3%)        | 0.000139       | Reactome                 |
| COP1-mediated vesicle transport                                                                           | 2.32E-06       | 69              | 29 (42.0%)        | 0.000176       | Reactome                 |
| Ribosome - Homo sapiens (human)                                                                           | 2.61E-06       | 153             | 51 (33.3%)        | 0.000191       | KEGG                     |
| Asparagine N-linked glycosylation                                                                         | 3.09E-06       | 286             | 82 (28.8%)        | 0.000219       | Reactome                 |
| Respiratory electron transport                                                                            | 4.04E-06       | 100             | 37 (37.0%)        | 0.000277       | Reactome                 |
| Membrane Trafficking                                                                                      | 4.68E-06       | 582             | 146 (25.1%)       | 0.000312       | Reactome                 |
| Oxidative phosphorylation - Homo sapiens (human)                                                          | 6.37E-06       | 133             | 45 (33.8%)        | 0.000412       | KEGG                     |
| Post-translational protein modification                                                                   | 7.30E-06       | 1383            | 306 (22.2%)       | 0.000458       | Reactome                 |
| The citric acid (TCA) cycle and respiratory electron transport                                            | 1.21E-05       | 173             | 54 (31.2%)        | 0.00074        | Reactome                 |
| Activation of the mRNA upon binding of the cap-binding complex and eIFs, and subsequent binding to 43S    | 1.31E-05       | 69              | 27 (40.3%)        | 0.000781       | Reactome                 |
| HSP90 chaperone cycle for steroid hormone receptors (SHR)                                                 | 1.47E-05       | 19              | 12 (63.2%)        | 0.000848       | Reactome                 |
| Proteasome Degradation                                                                                    | 1.60E-05       | 64              | 26 (40.6%)        | 0.000899       | Wikipathways             |
| Neurexins and neuroligins                                                                                 | 1.64E-05       | 57              | 24 (42.1%)        | 0.000901       | Reactome                 |
| Vesicle-mediated transport                                                                                | 1.79E-05       | 620             | 151 (24.4%)       | 0.000959       | Reactome                 |
| Transport to the Golgi and subsequent modification                                                        | 2.26E-05       | 168             | 52 (31.0%)        | 0.00118        | Reactome                 |
| Electron Transport Chain (OXPHOS system in mitochondria)                                                  | 2.35E-05       | 103             | 36 (35.0%)        | 0.0012         | Wikipathways             |
| Translation initiation complex formation                                                                  | 3.04E-05       | 68              | 26 (39.4%)        | 0.00148        | Reactome                 |
| Ribosomal scanning and start codon recognition                                                            | 3.04E-05       | 68              | 26 (39.4%)        | 0.00148        | Reactome                 |
| snRNP Assembly                                                                                            | 3.35E-05       | 52              | 22 (42.3%)        | 0.00157        | Reactome                 |
| Metabolism of non-coding RNA                                                                              | 3.35E-05       | 52              | 22 (42.3%)        | 0.00157        | Reactome                 |
| Cellular responses to stress                                                                              | 3.68E-05       | 345             | 91 (26.5%)        | 0.00168        | Reactome                 |
| InIA-mediated entry of Listeria monocytogenes into host cells                                             | 3.86E-05       | 8               | 7 (87.5%)         | 0.00169        | Reactome                 |
| GLI3 is processed to GLI3R by the proteasome                                                              | 4.01E-05       | 15              | 10 (66.7%)        | 0.00169        | Reactome                 |
| Degradation of GLI2 by the proteasome                                                                     | 4.01E-05       | 15              | 10 (66.7%)        | 0.00169        | Reactome                 |
| Degradation of GLI1 by the proteasome                                                                     | 4.01E-05       | 16              | 10 (66.7%)        | 0.00169        | Reactome                 |
| TP53 Regulates Metabolic Genes                                                                            | 4.31E-05       | 86              | 31 (36.0%)        | 0.00178        | Reactome                 |
| Cellular responses to external stimuli                                                                    | 5.69E-05       | 414             | 105 (25.4%)       | 0.00232        | Reactome                 |
| Cellular response to heat stress                                                                          | 5.89E-05       | 99              | 34 (34.3%)        | 0.00235        | Reactome                 |
| Antigen processing: Ubiquitination & Proteasome degradation                                               | 7.30E-05       | 264             | 72 (27.4%)        | 0.00286        | Reactome                 |
| Parkinson disease - Homo sapiens (human)                                                                  | 9.08E-05       | 142             | 44 (31.0%)        | 0.0035         | KEGG                     |
| Metabolism of amino acids and derivatives                                                                 | 0.0001         | 342             | 88 (26.0%)        | 0.00386        | Reactome                 |
| Formation of the ternary complex, and subsequently, the 43S complex                                       | 0.0001         | 61              | 23 (39.0%)        | 0.00387        | Reactome                 |
| Alzheimer disease - Homo sapiens (human)                                                                  | 0.00016        | 171             | 50 (29.2%)        | 0.00587        | KEGG                     |
| Protein-protein interactions at synapses                                                                  | 0.00018        | 88              | 30 (34.1%)        | 0.00648        | Reactome                 |
| Downregulation of TGF-beta receptor signaling                                                             | 0.00018        | 26              | 13 (50.0%)        | 0.00648        | Reactome                 |
| Ubiquitin-dependent degradation of Cyclin D1                                                              | 0.00019        | 7               | 6 (85.7%)         | 0.00648        | Reactome                 |
| Ubiquitin-dependent degradation of Cyclin D                                                               | 0.00019        | 7               | 6 (85.7%)         | 0.00648        | Reactome                 |
| Vibrio cholerae infection - Homo sapiens (human)                                                          | 0.00019        | 50              | 20 (40.0%)        | 0.00648        | KEGG                     |
| Host Interactions of HIV factors                                                                          | 0.00023        | 89              | 30 (33.7%)        | 0.00761        | Reactome                 |
| Huntington disease - Homo sapiens (human)                                                                 | 0.00031        | 193             | 54 (28.0%)        | 0.0101         | KEGG                     |
| Cytosolic tRNA aminoacylation                                                                             | 0.00033        | 24              | 12 (50.0%)        | 0.0105         | Reactome                 |
| Signaling by TGF-beta Receptor Complex                                                                    | 0.00034        | 67              | 24 (35.8%)        | 0.0108         | Reactome                 |
| SCF(Skp2)-mediated degradation of p27/p21                                                                 | 0.00035        | 18              | 10 (55.6%)        | 0.0109         | Reactome                 |
| Insulin processing                                                                                        | 0.00041        | 10              | 7 (70.0%)         | 0.0128         | Reactome                 |
| Spliceosome - Homo sapiens (human)                                                                        | 0.00044        | 134             | 40 (29.9%)        | 0.0134         | KEGG                     |
| Transcriptional Regulation by TP53                                                                        | 0.00063        | 374             | 91 (24.5%)        | 0.019          | Reactome                 |
| Hedgehog_off_state                                                                                        | 0.00067        | 44              | 17 (39.5%)        | 0.0199         | Reactome                 |
| Transport of Mature Transcript to Cytoplasm                                                               | 0.0007         | 82              | 27 (32.9%)        | 0.0205         | Reactome                 |
| HSF1-dependent transactivation                                                                            | 0.00072        | 36              | 15 (41.7%)        | 0.0207         | Reactome                 |
| Ciliary landscape                                                                                         | 0.00073        | 213             | 57 (26.8%)        | 0.0207         | Wikipathways             |
| Intra-Golgi and retrograde Golgi-to-ER traffic                                                            | 0.00074        | 186             | 51 (27.4%)        | 0.021          | Reactome                 |
| COP1-mediated anterograde transport                                                                       | 0.00086        | 83              | 27 (32.5%)        | 0.024          | Reactome                 |
| Cyclin D associated events in G1                                                                          | 0.00091        | 44              | 17 (38.6%)        | 0.0248         | Reactome                 |
| G1 Phase                                                                                                  | 0.00091        | 44              | 17 (38.6%)        | 0.0248         | Reactome                 |
| Vitamin B6-dependent and responsive disorders                                                             | 0.00101        | 4               | 4 (100.0%)        | 0.0271         | Wikipathways             |
| Cell Cycle                                                                                                | 0.00107        | 564             | 129 (22.9%)       | 0.0283         | Reactome                 |
| M Phase                                                                                                   | 0.00113        | 340             | 83 (24.5%)        | 0.0295         | Reactome                 |
| Cell Cycle, Mitotic                                                                                       | 0.00115        | 481             | 112 (23.3%)       | 0.0295         | Reactome                 |
| Processing of Capped Intron-Containing Pre-mRNA                                                           | 0.00116        | 240             | 62 (25.8%)        | 0.0295         | Reactome                 |
| Proteasome - Homo sapiens (human)                                                                         | 0.00123        | 45              | 17 (37.8%)        | 0.031          | KEGG                     |

|                                                                                    |         |      |             |        |              |
|------------------------------------------------------------------------------------|---------|------|-------------|--------|--------------|
| Regulation of HSF1-mediated heat shock response                                    | 0.00133 | 81   | 26 (32.1%)  | 0.0331 | Reactome     |
| Transport of Mature mRNA derived from an Intron-Containing Transcript              | 0.00138 | 73   | 24 (32.9%)  | 0.034  | Reactome     |
| MAP kinase activation                                                              | 0.00141 | 65   | 22 (33.8%)  | 0.034  | Reactome     |
| Interleukin-17 signaling                                                           | 0.00141 | 65   | 22 (33.8%)  | 0.034  | Reactome     |
| Glucose metabolism                                                                 | 0.00151 | 91   | 28 (31.1%)  | 0.0361 | Reactome     |
| Downregulation of SMAD2/3:SMAD4 transcriptional activity                           | 0.00166 | 21   | 10 (47.6%)  | 0.0392 | Reactome     |
| Glycolysis                                                                         | 0.00174 | 71   | 23 (32.9%)  | 0.0407 | Reactome     |
| Iron uptake and transport                                                          | 0.00177 | 58   | 20 (34.5%)  | 0.0409 | Reactome     |
| Regulation of RUNX2 expression and activity                                        | 0.00181 | 28   | 12 (42.9%)  | 0.0415 | Reactome     |
| Metabolism                                                                         | 0.00187 | 1972 | 396 (20.2%) | 0.0423 | Reactome     |
| antigen processing and presentation                                                | 0.00195 | 12   | 7 (58.3%)   | 0.0437 | BioCarta     |
| TGF-beta receptor signaling activates SMADs                                        | 0.00212 | 32   | 13 (40.6%)  | 0.047  | Reactome     |
| Detoxification of Reactive Oxygen Species                                          | 0.00236 | 36   | 14 (38.9%)  | 0.0519 | Reactome     |
| Negative regulation of MAPK pathway                                                | 0.00255 | 40   | 15 (37.5%)  | 0.0554 | Reactome     |
| Downregulation of ERBB2 signaling                                                  | 0.00259 | 29   | 12 (41.4%)  | 0.0559 | Reactome     |
| Cilium Assembly                                                                    | 0.00264 | 187  | 49 (26.2%)  | 0.0563 | Reactome     |
| Viral carcinogenesis - Homo sapiens (human)                                        | 0.00267 | 201  | 52 (25.9%)  | 0.0564 | KEGG         |
| Vpu mediated degradation of CD4                                                    | 0.00274 | 7    | 5 (71.4%)   | 0.0572 | Reactome     |
| Amino sugar and nucleotide sugar metabolism - Homo sapiens (human)                 | 0.00276 | 48   | 17 (35.4%)  | 0.0572 | KEGG         |
| Translesion Synthesis by POLH                                                      | 0.00297 | 19   | 9 (47.4%)   | 0.0604 | Reactome     |
| Listeria monocytogenes entry into host cells                                       | 0.00297 | 19   | 9 (47.4%)   | 0.0604 | Reactome     |
| Toll Like Receptor 9 (TLR9) Cascade                                                | 0.00308 | 94   | 28 (29.8%)  | 0.062  | Reactome     |
| Organelle biogenesis and maintenance                                               | 0.00312 | 240  | 60 (25.0%)  | 0.062  | Reactome     |
| Insulin receptor recycling                                                         | 0.00316 | 26   | 11 (42.3%)  | 0.062  | Reactome     |
| signaling pathway from g-protein families                                          | 0.00316 | 26   | 11 (42.3%)  | 0.062  | BioCarta     |
| Signaling by NOTCH1                                                                | 0.00321 | 74   | 23 (31.5%)  | 0.0623 | Reactome     |
| MAP3K8 (TPL2)-dependent MAPK1/3 activation                                         | 0.00334 | 16   | 8 (50.0%)   | 0.0633 | Reactome     |
| TGF-beta receptor signaling in EMT (epithelial to mesenchymal transition)          | 0.00334 | 16   | 8 (50.0%)   | 0.0633 | Reactome     |
| Oxidative phosphorylation                                                          | 0.00348 | 61   | 20 (32.8%)  | 0.0633 | Wikipathways |
| Intra-Golgi traffic                                                                | 0.00348 | 45   | 16 (35.6%)  | 0.0633 | Reactome     |
| Signal attenuation                                                                 | 0.00349 | 10   | 6 (60.0%)   | 0.0633 | Reactome     |
| Vif-mediated degradation of APOBEC3G                                               | 0.00349 | 10   | 6 (60.0%)   | 0.0633 | Reactome     |
| SCF-beta-TrCP mediated degradation of Emi1                                         | 0.00349 | 10   | 6 (60.0%)   | 0.0633 | Reactome     |
| FBXL7 down-regulates AURKA during mitotic entry and in early mitosis               | 0.00349 | 10   | 6 (60.0%)   | 0.0633 | Reactome     |
| DNA Damage Bypass                                                                  | 0.00354 | 49   | 17 (34.7%)  | 0.0634 | Reactome     |
| Endosomal/Vacuolar pathway                                                         | 0.00358 | 13   | 7 (53.8%)   | 0.0634 | Reactome     |
| Downregulation of ERBB2:ERBB3 signaling                                            | 0.00358 | 13   | 7 (53.8%)   | 0.0634 | Reactome     |
| MyD88 cascade initiated on plasma membrane                                         | 0.00405 | 87   | 26 (29.9%)  | 0.07   | Reactome     |
| Toll Like Receptor 10 (TLR10) Cascade                                              | 0.00405 | 87   | 26 (29.9%)  | 0.07   | Reactome     |
| Toll Like Receptor 5 (TLR5) Cascade                                                | 0.00405 | 87   | 26 (29.9%)  | 0.07   | Reactome     |
| Transcriptional activity of SMAD2/SMAD3:SMAD4 heterotrimer                         | 0.00423 | 38   | 14 (36.8%)  | 0.0726 | Reactome     |
| Thermogenesis - Homo sapiens (human)                                               | 0.00431 | 229  | 57 (24.9%)  | 0.0732 | KEGG         |
| Free fatty acid receptors                                                          | 0.00433 | 5    | 4 (80.0%)   | 0.0732 | Reactome     |
| tRNA Aminoacylation                                                                | 0.00438 | 42   | 15 (35.7%)  | 0.0735 | Reactome     |
| SUMOylation of RNA binding proteins                                                | 0.00446 | 46   | 16 (34.8%)  | 0.0743 | Reactome     |
| TRAF6 mediated induction of NFkB and MAP kinases upon TLR7/8 or 9 activation       | 0.00479 | 88   | 26 (29.5%)  | 0.0791 | Reactome     |
| Trafficking of AMPA receptors                                                      | 0.00498 | 31   | 12 (38.7%)  | 0.0804 | Reactome     |
| Glutamate binding, activation of AMPA receptors and synaptic plasticity            | 0.00498 | 31   | 12 (38.7%)  | 0.0804 | Reactome     |
| Activated NOTCH1 Transmits Signal to the Nucleus                                   | 0.00498 | 32   | 12 (38.7%)  | 0.0804 | Reactome     |
| Anchoring of the basal body to the plasma membrane                                 | 0.00502 | 97   | 28 (28.9%)  | 0.0804 | Reactome     |
| E3 ubiquitin ligases ubiquitinate target proteins                                  | 0.00541 | 59   | 19 (32.2%)  | 0.0851 | Reactome     |
| UCH proteinases                                                                    | 0.0055  | 102  | 29 (28.4%)  | 0.0851 | Reactome     |
| Degradation of beta-catenin by the destruction complex                             | 0.00553 | 39   | 14 (35.9%)  | 0.0851 | Reactome     |
| Activation of NMDA receptor and postsynaptic events                                | 0.00553 | 39   | 14 (35.9%)  | 0.0851 | Reactome     |
| Translesion synthesis by Y family DNA polymerases bypasses lesions on DNA template | 0.00553 | 39   | 14 (35.9%)  | 0.0851 | Reactome     |
| Complex I biogenesis                                                               | 0.00554 | 55   | 18 (32.7%)  | 0.0851 | Reactome     |
| opposing roles of aif in apoptosis and cell survival                               | 0.00567 | 3    | 3 (100.0%)  | 0.0865 | BioCarta     |
| Mitotic Telophase/Cytokinesis                                                      | 0.00606 | 14   | 7 (50.0%)   | 0.0912 | Reactome     |
| Golgi Cisternae Pericentriolar Stack Reorganization                                | 0.00606 | 14   | 7 (50.0%)   | 0.0912 | Reactome     |
| Attenuation phase                                                                  | 0.00621 | 28   | 11 (39.3%)  | 0.0927 | Reactome     |
| Downregulation of ERBB4 signaling                                                  | 0.00624 | 8    | 5 (62.5%)   | 0.0927 | Reactome     |
| Establishment of Sister Chromatid Cohesion                                         | 0.00652 | 11   | 6 (54.5%)   | 0.0961 | Reactome     |
| MyD88 dependent cascade initiated on endosome                                      | 0.00662 | 90   | 26 (28.9%)  | 0.0963 | Reactome     |
| Toll Like Receptor 7/8 (TLR7/8) Cascade                                            | 0.00662 | 90   | 26 (28.9%)  | 0.0963 | Reactome     |
| Gene and protein expression by JAK-STAT signaling after Interleukin-12 stimulation | 0.00699 | 36   | 13 (36.1%)  | 0.101  | Wikipathways |
| Parkin-Ubiquitin Proteasomal System pathway                                        | 0.00701 | 73   | 22 (30.1%)  | 0.101  | Wikipathways |
| Regulation of PLK1 Activity at G2/M Transition                                     | 0.00822 | 87   | 25 (28.7%)  | 0.117  | Reactome     |
| Signaling by TGF-beta family members                                               | 0.00842 | 96   | 27 (28.1%)  | 0.118  | Reactome     |
| Cyclin E associated events during G1/S transition                                  | 0.00842 | 29   | 11 (37.9%)  | 0.118  | Reactome     |
| Cyclin A:Cdk2-associated events at S phase entry                                   | 0.00842 | 29   | 11 (37.9%)  | 0.118  | Reactome     |
| Antigen processing-Cross presentation                                              | 0.00886 | 49   | 16 (32.7%)  | 0.123  | Reactome     |
| Glycolysis and Gluconeogenesis                                                     | 0.00903 | 45   | 15 (33.3%)  | 0.125  | Wikipathways |
| Type II diabetes mellitus                                                          | 0.0096  | 22   | 9 (40.9%)   | 0.13   | Wikipathways |
| Constitutive Signaling by NOTCH1 HD Domain Mutants                                 | 0.00964 | 15   | 7 (46.7%)   | 0.13   | Reactome     |
| Signaling by NOTCH1 HD Domain Mutants in Cancer                                    | 0.00964 | 15   | 7 (46.7%)   | 0.13   | Reactome     |
| Regulation of innate immune responses to cytosolic DNA                             | 0.00964 | 15   | 7 (46.7%)   | 0.13   | Reactome     |

| <b>DOWNREGULATED pathways</b>                                                                             | <b>p value</b> | <b>set size</b> | <b>candidates</b> | <b>q value</b> | <b>Pathways database</b> |
|-----------------------------------------------------------------------------------------------------------|----------------|-----------------|-------------------|----------------|--------------------------|
| Respiratory electron transport, ATP synthesis by chemiosmotic coupling, and heat production by uncoupling | 2.23E-11       | 123             | 37 (30.1%)        | 5.75E-08       | Reactome                 |
| The citric acid (TCA) cycle and respiratory electron transport                                            | 1.44E-10       | 173             | 44 (25.4%)        | 1.86E-07       | Reactome                 |
| Oxidative phosphorylation - Homo sapiens (human)                                                          | 2.73E-10       | 133             | 37 (27.8%)        | 2.35E-07       | KEGG                     |
| Metabolism of proteins                                                                                    | 5.51E-10       | 2008            | 255 (12.8%)       | 3.56E-07       | Reactome                 |
| Translation                                                                                               | 3.75E-09       | 310             | 60 (19.8%)        | 1.75E-06       | Reactome                 |
| Electron Transport Chain (OXPHOS system in mitochondria)                                                  | 4.07E-09       | 103             | 30 (29.1%)        | 1.75E-06       | Wikipathways             |
| Respiratory electron transport                                                                            | 8.22E-09       | 100             | 29 (29.0%)        | 3.04E-06       | Reactome                 |
| Alzheimer disease - Homo sapiens (human)                                                                  | 4.23E-08       | 171             | 39 (22.8%)        | 1.37E-05       | KEGG                     |
| Parkinson disease - Homo sapiens (human)                                                                  | 8.85E-08       | 142             | 34 (23.9%)        | 2.54E-05       | KEGG                     |
| Huntington disease - Homo sapiens (human)                                                                 | 4.38E-07       | 193             | 40 (20.7%)        | 0.000113       | KEGG                     |
| ER to Golgi Anterograde Transport                                                                         | 1.22E-06       | 137             | 31 (22.6%)        | 0.000286       | Reactome                 |
| Mitochondrial Electron Transport Chain                                                                    | 2.73E-06       | 20              | 10 (50.0%)        | 0.000588       | SMPDB                    |
| Thermogenesis - Homo sapiens (human)                                                                      | 6.47E-06       | 229             | 42 (18.3%)        | 0.00129        | KEGG                     |

|                                                                    |          |      |             |         |              |
|--------------------------------------------------------------------|----------|------|-------------|---------|--------------|
| Metabolism                                                         | 1.47E-05 | 1972 | 227 (11.6%) | 0.00271 | Reactome     |
| Oxidative phosphorylation                                          | 1.80E-05 | 61   | 17 (27.9%)  | 0.00309 | Wikipathways |
| Isoleucine degradation                                             | 2.52E-05 | 12   | 7 (58.3%)   | 0.00407 | HumanCyc     |
| Asparagine N-linked glycosylation                                  | 3.43E-05 | 286  | 47 (16.5%)  | 0.00482 | Reactome     |
| Cellular responses to external stimuli                             | 3.57E-05 | 414  | 62 (15.1%)  | 0.00482 | Reactome     |
| Insulin receptor recycling                                         | 4.74E-05 | 26   | 10 (38.5%)  | 0.00482 | Reactome     |
| Lysine Degradation                                                 | 5.03E-05 | 13   | 7 (53.8%)   | 0.00482 | SMPDB        |
| Hyperlysinemia I, Familial                                         | 5.03E-05 | 13   | 7 (53.8%)   | 0.00482 | SMPDB        |
| 2-aminoadipic 2-oxoadipic aciduria                                 | 5.03E-05 | 13   | 7 (53.8%)   | 0.00482 | SMPDB        |
| Pyridoxine dependency with seizures                                | 5.03E-05 | 13   | 7 (53.8%)   | 0.00482 | SMPDB        |
| Saccharopinuria/Hyperlysinemia II                                  | 5.03E-05 | 13   | 7 (53.8%)   | 0.00482 | SMPDB        |
| Glutaric Aciduria Type I                                           | 5.03E-05 | 13   | 7 (53.8%)   | 0.00482 | SMPDB        |
| Hyperlysinemia II or Saccharopinuria                               | 5.03E-05 | 13   | 7 (53.8%)   | 0.00482 | SMPDB        |
| valine degradation                                                 | 5.03E-05 | 13   | 7 (53.8%)   | 0.00482 | HumanCyc     |
| Non-alcoholic fatty liver disease (NAFLD) - Homo sapiens (human)   | 5.59E-05 | 149  | 29 (19.5%)  | 0.00502 | KEGG         |
| Valine, leucine and isoleucine degradation - Homo sapiens (human)  | 5.63E-05 | 48   | 14 (29.2%)  | 0.00502 | KEGG         |
| Protein processing in endoplasmic reticulum - Homo sapiens (human) | 6.36E-05 | 165  | 31 (18.8%)  | 0.00548 | KEGG         |
| Complex I biogenesis                                               | 7.29E-05 | 55   | 15 (27.3%)  | 0.00608 | Reactome     |
| adenosine ribonucleotides <i>de novo</i> biosynthesis              | 8.08E-05 | 38   | 12 (31.6%)  | 0.00644 | HumanCyc     |
| Propanoate metabolism                                              | 8.22E-05 | 18   | 8 (44.4%)   | 0.00644 | EHMN         |
| Vesicle-mediated transport                                         | 8.98E-05 | 620  | 84 (13.5%)  | 0.00648 | Reactome     |
| Transport to the Golgi and subsequent modification                 | 9.03E-05 | 168  | 31 (18.5%)  | 0.00648 | Reactome     |
| Vibrio cholerae infection - Homo sapiens (human)                   | 9.22E-05 | 50   | 14 (28.0%)  | 0.00648 | KEGG         |
| Golgi Cisternae Pericentriolar Stack Reorganization                | 9.28E-05 | 14   | 7 (50.0%)   | 0.00648 | Reactome     |
| TLR NFkB                                                           | 9.98E-05 | 69   | 17 (24.6%)  | 0.00662 | INOH         |
| COPII-mediated vesicle transport                                   | 9.98E-05 | 69   | 17 (24.6%)  | 0.00662 | Reactome     |
| COPI-mediated anterograde transport                                | 0.00012  | 83   | 19 (22.9%)  | 0.00737 | Reactome     |
| Nonalcoholic fatty liver disease                                   | 0.00012  | 155  | 29 (18.7%)  | 0.00737 | Wikipathways |
| Proteasome Degradation                                             | 0.00013  | 64   | 16 (25.0%)  | 0.00792 | Wikipathways |
| IL-1 NFkB                                                          | 0.00013  | 64   | 16 (25.0%)  | 0.00792 | INOH         |
| Membrane Trafficking                                               | 0.00014  | 582  | 79 (13.6%)  | 0.00801 | Reactome     |
| Post-translational protein modification                            | 0.00015  | 1383 | 162 (11.8%) | 0.00884 | Reactome     |
| Ciliary landscape                                                  | 0.00017  | 213  | 36 (16.9%)  | 0.00935 | Wikipathways |
| HSF1-dependent transactivation                                     | 0.00022  | 36   | 11 (30.6%)  | 0.0122  | Reactome     |
| Cellular responses to stress                                       | 0.00023  | 345  | 51 (14.9%)  | 0.0124  | Reactome     |
| Neddylation                                                        | 0.00026  | 235  | 38 (16.2%)  | 0.0135  | Reactome     |
| Mitochondrial translation initiation                               | 0.00026  | 89   | 19 (21.6%)  | 0.0135  | Reactome     |
| Signaling by Insulin receptor                                      | 0.0003   | 75   | 17 (22.7%)  | 0.015   | Reactome     |
| Free fatty acid receptors                                          | 0.00031  | 5    | 4 (80.0%)   | 0.0152  | Reactome     |
| tRNA charging                                                      | 0.00038  | 38   | 11 (28.9%)  | 0.018   | HumanCyc     |
| TLR p38                                                            | 0.00038  | 63   | 15 (23.8%)  | 0.018   | INOH         |
| Lysine degradation                                                 | 0.00043  | 22   | 8 (36.4%)   | 0.0203  | INOH         |
| Proteasome - Homo sapiens (human)                                  | 0.00048  | 45   | 12 (26.7%)  | 0.0219  | KEGG         |
| Iron uptake and transport                                          | 0.0005   | 58   | 14 (24.1%)  | 0.0228  | Reactome     |
| CD4 T cell receptor signaling                                      | 0.00054  | 130  | 24 (18.5%)  | 0.0239  | INOH         |
| Hedgehog                                                           | 0.00056  | 72   | 16 (22.2%)  | 0.0245  | INOH         |
| superpathway of purine nucleotide salvage                          | 0.00061  | 59   | 14 (23.7%)  | 0.025   | HumanCyc     |
| purine nucleotides <i>de novo</i> biosynthesis                     | 0.00061  | 59   | 14 (23.7%)  | 0.025   | HumanCyc     |
| Branched-chain amino acid catabolism                               | 0.00061  | 23   | 8 (34.8%)   | 0.025   | Reactome     |
| Cristae formation                                                  | 0.00062  | 18   | 7 (38.9%)   | 0.025   | Reactome     |
| Formation of ATP by chemiosmotic coupling                          | 0.00062  | 18   | 7 (38.9%)   | 0.025   | Reactome     |
| Mitochondrial translation                                          | 0.00063  | 95   | 19 (20.2%)  | 0.025   | Reactome     |
| IL-1 p38                                                           | 0.00064  | 66   | 15 (22.7%)  | 0.0251  | INOH         |
| opposing roles of aif in apoptosis and cell survival               | 0.00073  | 3    | 3 (100.0%)  | 0.0263  | BioCarta     |
| Mitochondrial translation termination                              | 0.00075  | 89   | 18 (20.5%)  | 0.0263  | Reactome     |
| Mitochondrial translation elongation                               | 0.00075  | 89   | 18 (20.5%)  | 0.0263  | Reactome     |
| TNF                                                                | 0.00076  | 67   | 15 (22.4%)  | 0.0263  | INOH         |
| Detoxification of Reactive Oxygen Species                          | 0.00077  | 36   | 10 (28.6%)  | 0.0263  | Reactome     |
| Cytosolic tRNA aminoacylation                                      | 0.00085  | 24   | 8 (33.3%)   | 0.0263  | Reactome     |
| Scavenging by Class F Receptors                                    | 0.00085  | 6    | 4 (66.7%)   | 0.0263  | Reactome     |
| Amino sugar and nucleotide sugar metabolism - Homo sapiens (human) | 0.00089  | 48   | 12 (25.0%)  | 0.0263  | KEGG         |
| HSP90 chaperone cycle for steroid hormone receptors (SHR)          | 0.00091  | 19   | 7 (36.8%)   | 0.0263  | Reactome     |
| CD4 T cell receptor signaling-NFkB cascade                         | 0.00094  | 97   | 19 (19.6%)  | 0.0263  | INOH         |
| tRNA Aminoacylation                                                | 0.00096  | 42   | 11 (26.2%)  | 0.0263  | Reactome     |
| 3-Methylglutaconic Aciduria Type I                                 | 0.00096  | 30   | 9 (30.0%)   | 0.0263  | SMPDB        |
| Valine, Leucine and Isoleucine Degradation                         | 0.00096  | 30   | 9 (30.0%)   | 0.0263  | SMPDB        |
| 2-Methyl-3-Hydroxybutyryl CoA Dehydrogenase Deficiency             | 0.00096  | 30   | 9 (30.0%)   | 0.0263  | SMPDB        |
| Isovaleric Aciduria                                                | 0.00096  | 30   | 9 (30.0%)   | 0.0263  | SMPDB        |
| 3-Methylcrotonyl Coa Carboxylase Deficiency Type I                 | 0.00096  | 30   | 9 (30.0%)   | 0.0263  | SMPDB        |
| Propionic Acidemia                                                 | 0.00096  | 30   | 9 (30.0%)   | 0.0263  | SMPDB        |
| Maple Syrup Urine Disease                                          | 0.00096  | 30   | 9 (30.0%)   | 0.0263  | SMPDB        |
| 3-Hydroxy-3-Methylglutaryl-CoA Lyase Deficiency                    | 0.00096  | 30   | 9 (30.0%)   | 0.0263  | SMPDB        |
| Isobutyryl-coa dehydrogenase deficiency                            | 0.00096  | 30   | 9 (30.0%)   | 0.0263  | SMPDB        |
| 3-hydroxyisobutyric aciduria                                       | 0.00096  | 30   | 9 (30.0%)   | 0.0263  | SMPDB        |
| 3-hydroxyisobutyric acid dehydrogenase deficiency                  | 0.00096  | 30   | 9 (30.0%)   | 0.0263  | SMPDB        |
| Isovaleric acidemia                                                | 0.00096  | 30   | 9 (30.0%)   | 0.0263  | SMPDB        |
| Methylmalonate Semialdehyde Dehydrogenase Deficiency               | 0.00096  | 30   | 9 (30.0%)   | 0.0263  | SMPDB        |
| Methylmalonic Aciduria                                             | 0.00096  | 30   | 9 (30.0%)   | 0.0263  | SMPDB        |
| 3-Methylglutaconic Aciduria Type IV                                | 0.00096  | 30   | 9 (30.0%)   | 0.0263  | SMPDB        |
| 3-Methylglutaconic Aciduria Type III                               | 0.00096  | 30   | 9 (30.0%)   | 0.0263  | SMPDB        |
| Beta-Ketothiolase Deficiency                                       | 0.00096  | 30   | 9 (30.0%)   | 0.0263  | SMPDB        |
| Signal attenuation                                                 | 0.00101  | 10   | 5 (50.0%)   | 0.0274  | Reactome     |
| TLR JNK                                                            | 0.00103  | 62   | 14 (22.6%)  | 0.0274  | INOH         |
| IL-1 JNK                                                           | 0.00103  | 62   | 14 (22.6%)  | 0.0274  | INOH         |
| Valine, leucine and isoleucine degradation                         | 0.00109  | 49   | 12 (24.5%)  | 0.0287  | EHMN         |
| Transferrin endocytosis and recycling                              | 0.00124  | 31   | 9 (29.0%)   | 0.0324  | Reactome     |
| Pentose phosphate pathway (hexose monophosphate shunt)             | 0.0013   | 15   | 6 (40.0%)   | 0.0337  | Reactome     |
| Notch                                                              | 0.00139  | 79   | 16 (20.5%)  | 0.0357  | INOH         |
| DNA Repair                                                         | 0.00148  | 320  | 45 (14.2%)  | 0.0376  | Reactome     |
| Transcriptional Regulation by TP53                                 | 0.00153  | 374  | 51 (13.7%)  | 0.0383  | Reactome     |
| TP53 Regulates Metabolic Genes                                     | 0.00154  | 86   | 17 (19.8%)  | 0.0383  | Reactome     |

|                                                                                                        |         |      |             |        |              |
|--------------------------------------------------------------------------------------------------------|---------|------|-------------|--------|--------------|
| Citrate cycle                                                                                          | 0.00159 | 32   | 9 (28.1%)   | 0.0392 | INOH         |
| Integration of energy metabolism                                                                       | 0.00166 | 94   | 18 (19.1%)  | 0.0394 | Reactome     |
| DroToll-like                                                                                           | 0.00167 | 65   | 14 (21.5%)  | 0.0394 | INOH         |
| MAP kinase activation                                                                                  | 0.00167 | 65   | 14 (21.5%)  | 0.0394 | Reactome     |
| Interleukin-17 signaling                                                                               | 0.00167 | 65   | 14 (21.5%)  | 0.0394 | Reactome     |
| Phenylalanine and Tyrosine Metabolism                                                                  | 0.00172 | 11   | 5 (45.5%)   | 0.0394 | SMPDB        |
| Phenylketonuria                                                                                        | 0.00172 | 11   | 5 (45.5%)   | 0.0394 | SMPDB        |
| Tyrosinemia Type 3 (TYRO3)                                                                             | 0.00172 | 11   | 5 (45.5%)   | 0.0394 | SMPDB        |
| Tyrosinemia Type 2 (or Richner-Hanhart syndrome)                                                       | 0.00172 | 11   | 5 (45.5%)   | 0.0394 | SMPDB        |
| Glycolysis and Gluconeogenesis                                                                         | 0.00176 | 45   | 11 (24.4%)  | 0.0396 | Wikipathways |
| Warburg Effect                                                                                         | 0.00176 | 45   | 11 (24.4%)  | 0.0396 | SMPDB        |
| Ubiquitin-dependent degradation of Cyclin D1                                                           | 0.00185 | 7    | 4 (57.1%)   | 0.0408 | Reactome     |
| Ubiquitin-dependent degradation of Cyclin D                                                            | 0.00185 | 7    | 4 (57.1%)   | 0.0408 | Reactome     |
| E3 ubiquitin ligases ubiquitinate target proteins                                                      | 0.00195 | 59   | 13 (22.0%)  | 0.0426 | Reactome     |
| transcription factor creb and its extracellular signals                                                | 0.002   | 27   | 8 (29.6%)   | 0.0434 | BioCarta     |
| Cap-dependent Translation Initiation                                                                   | 0.00211 | 133  | 22 (17.3%)  | 0.0452 | Reactome     |
| Eukaryotic Translation Initiation                                                                      | 0.00211 | 133  | 22 (17.3%)  | 0.0452 | Reactome     |
| TP53 Regulates Transcription of DNA Repair Genes                                                       | 0.00226 | 70   | 14 (20.9%)  | 0.0471 | Reactome     |
| Gluconeogenesis                                                                                        | 0.00242 | 22   | 7 (31.8%)   | 0.0471 | SMPDB        |
| Glycogenesis, Type IA. Von gierke disease                                                              | 0.00242 | 22   | 7 (31.8%)   | 0.0471 | SMPDB        |
| Glycogenesis, Type IC                                                                                  | 0.00242 | 22   | 7 (31.8%)   | 0.0471 | SMPDB        |
| Glycogen Storage Disease Type 1A (GSD1A) or Von Gierke Disease                                         | 0.00242 | 22   | 7 (31.8%)   | 0.0471 | SMPDB        |
| Triosephosphate isomerase                                                                              | 0.00242 | 22   | 7 (31.8%)   | 0.0471 | SMPDB        |
| Fructose-1,6-diphosphatase deficiency                                                                  | 0.00242 | 22   | 7 (31.8%)   | 0.0471 | SMPDB        |
| Phosphoenolpyruvate carboxykinase deficiency 1 (PEPCK1)                                                | 0.00242 | 22   | 7 (31.8%)   | 0.0471 | SMPDB        |
| Glycogenesis, Type IB                                                                                  | 0.00242 | 22   | 7 (31.8%)   | 0.0471 | SMPDB        |
| Metabolism of amino acids and derivatives                                                              | 0.00245 | 342  | 46 (13.8%)  | 0.0471 | Reactome     |
| Organelle biogenesis and maintenance                                                                   | 0.00246 | 240  | 35 (14.8%)  | 0.0471 | Reactome     |
| Ub-specific processing proteases                                                                       | 0.0025  | 220  | 33 (15.0%)  | 0.0471 | Reactome     |
| Gluconeogenesis                                                                                        | 0.00253 | 35   | 9 (26.5%)   | 0.0471 | Reactome     |
| Attenuation phase                                                                                      | 0.00258 | 28   | 8 (28.6%)   | 0.0471 | Reactome     |
| Prefoldin mediated transfer of substrate to CCT/TrC                                                    | 0.00258 | 28   | 8 (28.6%)   | 0.0471 | Reactome     |
| Glycerolipid metabolism - Homo sapiens (human)                                                         | 0.00267 | 61   | 13 (21.3%)  | 0.0471 | KEGG         |
| Processing of DNA double-strand break ends                                                             | 0.00269 | 99   | 18 (18.4%)  | 0.0471 | Reactome     |
| Hypusine synthesis from eIF5A-lysine                                                                   | 0.00273 | 4    | 3 (75.0%)   | 0.0471 | Reactome     |
| Resolution of AP sites via the single-nucleotide replacement pathway                                   | 0.00273 | 4    | 3 (75.0%)   | 0.0471 | Reactome     |
| lysine degradation I (saccharopine pathway)                                                            | 0.00273 | 4    | 3 (75.0%)   | 0.0471 | HumanCyc     |
| Vitamin B6-dependent and responsive disorders                                                          | 0.00273 | 4    | 3 (75.0%)   | 0.0471 | Wikipathways |
| Dimethyl-branched-chain fatty acid mitochondrial beta-oxidation                                        | 0.00273 | 12   | 5 (41.7%)   | 0.0471 | EHMN         |
| il 3 signaling pathway                                                                                 | 0.00273 | 12   | 5 (41.7%)   | 0.0471 | BioCarta     |
| Sialuria or French Type Sialuria                                                                       | 0.00275 | 17   | 6 (35.3%)   | 0.0471 | SMPDB        |
| Sialuria or French Type Sialuria                                                                       | 0.00275 | 17   | 6 (35.3%)   | 0.0471 | SMPDB        |
| Amino Sugar Metabolism                                                                                 | 0.00275 | 17   | 6 (35.3%)   | 0.0471 | SMPDB        |
| G(M2)-Gangliosidosis: Variant B, Tay-sachs disease                                                     | 0.00275 | 17   | 6 (35.3%)   | 0.0471 | SMPDB        |
| Tay-Sachs Disease                                                                                      | 0.00275 | 17   | 6 (35.3%)   | 0.0471 | SMPDB        |
| Salla Disease/Infantile Sialic Acid Storage Disease                                                    | 0.00275 | 17   | 6 (35.3%)   | 0.0471 | SMPDB        |
| Butanoate metabolism                                                                                   | 0.00275 | 17   | 6 (35.3%)   | 0.0471 | INOH         |
| Metabolism of RNA                                                                                      | 0.00301 | 586  | 72 (12.4%)  | 0.0512 | Reactome     |
| Homology Directed Repair                                                                               | 0.00312 | 141  | 23 (16.5%)  | 0.0527 | Reactome     |
| how progesterone initiates the oocyte maturation                                                       | 0.00321 | 23   | 7 (30.4%)   | 0.054  | BioCarta     |
| Butyrate Metabolism                                                                                    | 0.00343 | 8    | 4 (50.0%)   | 0.0564 | SMPDB        |
| InIA-mediated entry of Listeria monocytogenes into host cells                                          | 0.00343 | 8    | 4 (50.0%)   | 0.0564 | Reactome     |
| Mitochondrial Beta-Oxidation of Medium Chain Saturated Fatty Acids                                     | 0.00343 | 8    | 4 (50.0%)   | 0.0564 | SMPDB        |
| Prolactin signaling pathway - Homo sapiens (human)                                                     | 0.00346 | 70   | 14 (20.0%)  | 0.0567 | KEGG         |
| Synaptic vesicle cycle - Homo sapiens (human)                                                          | 0.00359 | 63   | 13 (20.6%)  | 0.0584 | KEGG         |
| Golgi Associated Vesicle Biogenesis                                                                    | 0.00366 | 56   | 12 (21.4%)  | 0.0588 | Reactome     |
| TNFalpha                                                                                               | 0.00366 | 234  | 34 (14.5%)  | 0.0588 | NetPath      |
| Gene and protein expression by JAK-STAT signaling after Interleukin-12 stimulation                     | 0.00385 | 36   | 9 (25.0%)   | 0.0614 | Wikipathways |
| Toll Like Receptor 9 (TLR9) Cascade                                                                    | 0.00411 | 94   | 17 (18.1%)  | 0.0643 | Reactome     |
| Pentose phosphate pathway - Homo sapiens (human)                                                       | 0.00413 | 30   | 8 (26.7%)   | 0.0643 | KEGG         |
| Activation of the mRNA upon binding of the cap-binding complex and eIFs, and subsequent binding to 43S | 0.00414 | 69   | 13 (20.3%)  | 0.0643 | Reactome     |
| B cell receptor signaling                                                                              | 0.00418 | 134  | 22 (16.4%)  | 0.0643 | INOH         |
| Doxorubicin Pathway (Cardiomyocyte Cell), Pharmacodynamics                                             | 0.00419 | 24   | 7 (29.2%)   | 0.0643 | PharmGKB     |
| proteasome complex                                                                                     | 0.00419 | 24   | 7 (29.2%)   | 0.0643 | BioCarta     |
| UCH proteinases                                                                                        | 0.0042  | 102  | 18 (17.6%)  | 0.0643 | Reactome     |
| Translation Factors                                                                                    | 0.00428 | 50   | 11 (22.0%)  | 0.0651 | Wikipathways |
| MyD88 cascade initiated on plasma membrane                                                             | 0.00446 | 87   | 16 (18.4%)  | 0.0666 | Reactome     |
| Toll Like Receptor 10 (TLR10) Cascade                                                                  | 0.00446 | 87   | 16 (18.4%)  | 0.0666 | Reactome     |
| Toll Like Receptor 5 (TLR5) Cascade                                                                    | 0.00446 | 87   | 16 (18.4%)  | 0.0666 | Reactome     |
| SRP-dependent cotranslational protein targeting to membrane                                            | 0.00469 | 124  | 20 (16.8%)  | 0.0693 | Reactome     |
| L13a-mediated translational silencing of Ceruloplasmin expression                                      | 0.00469 | 125  | 20 (16.8%)  | 0.0693 | Reactome     |
| Signaling by ERBB4                                                                                     | 0.00496 | 44   | 10 (22.7%)  | 0.0728 | Reactome     |
| TRAF6 mediated induction of NFkB and MAP kinases upon TLR7/8 or 9 activation                           | 0.005   | 88   | 16 (18.2%)  | 0.0731 | Reactome     |
| Nucleotide Metabolism                                                                                  | 0.00516 | 19   | 6 (31.6%)   | 0.0742 | Wikipathways |
| Listeria monocytogenes entry into host cells                                                           | 0.00516 | 19   | 6 (31.6%)   | 0.0742 | Reactome     |
| GTP hydrolysis and joining of the 60S ribosomal subunit                                                | 0.00517 | 126  | 20 (16.7%)  | 0.0742 | Reactome     |
| RNA Polymerase II Transcription                                                                        | 0.00526 | 1236 | 136 (11.1%) | 0.0751 | Reactome     |
| Propanoate metabolism                                                                                  | 0.00537 | 25   | 7 (28.0%)   | 0.0755 | INOH         |
| gluconeogenesis                                                                                        | 0.00537 | 26   | 7 (28.0%)   | 0.0755 | HumanCyc     |
| Saturated fatty acids beta-oxidation                                                                   | 0.00537 | 25   | 7 (28.0%)   | 0.0755 | EHMN         |
| Selenium Metabolism and Selenoproteins                                                                 | 0.00566 | 38   | 9 (23.7%)   | 0.0788 | Wikipathways |
| RNA transport - Homo sapiens (human)                                                                   | 0.00567 | 171  | 26 (15.2%)  | 0.0788 | KEGG         |
| Transfer of Acetyl Groups into Mitochondria                                                            | 0.00573 | 9    | 4 (44.4%)   | 0.0792 | SMPDB        |
| Gene expression (Transcription)                                                                        | 0.0059  | 1373 | 149 (10.9%) | 0.0794 | Reactome     |
| SHC1 events in ERBB4 signaling                                                                         | 0.00593 | 14   | 5 (35.7%)   | 0.0794 | Reactome     |
| Malonyl-coa decarboxylase deficiency                                                                   | 0.00593 | 14   | 5 (35.7%)   | 0.0794 | SMPDB        |
| Malonic Aciduria                                                                                       | 0.00593 | 14   | 5 (35.7%)   | 0.0794 | SMPDB        |
| Propanoate Metabolism                                                                                  | 0.00593 | 14   | 5 (35.7%)   | 0.0794 | SMPDB        |
| Methylmalonic Aciduria Due to Cobalamin-Related Disorders                                              | 0.00593 | 14   | 5 (35.7%)   | 0.0794 | SMPDB        |
| MyD88 dependent cascade initiated on endosome                                                          | 0.00626 | 90   | 16 (17.8%)  | 0.0815 | Reactome     |
| Toll Like Receptor 7/8 (TLR7/8) Cascade                                                                | 0.00626 | 90   | 16 (17.8%)  | 0.0815 | Reactome     |

|                                                                                   |         |      |             |        |              |
|-----------------------------------------------------------------------------------|---------|------|-------------|--------|--------------|
| Valine Leucine Isoleucine degradation                                             | 0.00632 | 32   | 8 (25.0%)   | 0.0815 | INOH         |
| ROS, RNS production in phagocytes                                                 | 0.00632 | 32   | 8 (25.0%)   | 0.0815 | Reactome     |
| Propanoate metabolism - Homo sapiens (human)                                      | 0.00632 | 32   | 8 (25.0%)   | 0.0815 | KEGG         |
| Beta oxidation of hexanoyl-CoA to butanoyl-CoA                                    | 0.00637 | 5    | 3 (60.0%)   | 0.0815 | Reactome     |
| Beta oxidation of lauroyl-CoA to decanoyl-CoA-CoA                                 | 0.00637 | 5    | 3 (60.0%)   | 0.0815 | Reactome     |
| Beta oxidation of octanoyl-CoA to hexanoyl-CoA                                    | 0.00637 | 5    | 3 (60.0%)   | 0.0815 | Reactome     |
| malate-aspartate shuttle                                                          | 0.00637 | 5    | 3 (60.0%)   | 0.0815 | HumanCyc     |
| Antigen processing: Ubiquitination & Proteasome degradation                       | 0.00667 | 264  | 36 (13.8%)  | 0.0849 | Reactome     |
| superpathway of methionine degradation                                            | 0.00682 | 20   | 6 (30.0%)   | 0.0861 | HumanCyc     |
| Selenium Micronutrient Network                                                    | 0.00684 | 83   | 15 (18.1%)  | 0.0861 | WikiPathways |
| Retrograde endocannabinoid signaling - Homo sapiens (human)                       | 0.00686 | 148  | 23 (15.5%)  | 0.0861 | KEGG         |
| Insulin Pathway                                                                   | 0.00691 | 46   | 10 (21.7%)  | 0.0863 | PID          |
| Cellular response to heat stress                                                  | 0.00703 | 99   | 17 (17.2%)  | 0.0874 | Reactome     |
| Epithelial cell signaling in Helicobacter pylori infection - Homo sapiens (human) | 0.00707 | 68   | 13 (19.1%)  | 0.0875 | KEGG         |
| Generic Transcription Pathway                                                     | 0.00744 | 1107 | 122 (11.1%) | 0.0915 | Reactome     |
| Golgi-to-ER retrograde transport                                                  | 0.00763 | 116  | 19 (16.4%)  | 0.0934 | Reactome     |
| Cooperation of Prefoldin and TriC/CCT in actin and tubulin folding                | 0.0077  | 33   | 8 (24.2%)   | 0.0934 | Reactome     |
| bioactive peptide induced signaling pathway                                       | 0.0077  | 33   | 8 (24.2%)   | 0.0934 | BioCarta     |
| HDR through Homologous Recombination (HR) or Single Strand Annealing (SSA)        | 0.00795 | 135  | 21 (15.8%)  | 0.096  | Reactome     |
| mTOR signaling pathway - Homo sapiens (human)                                     | 0.00806 | 151  | 23 (15.3%)  | 0.096  | KEGG         |
| superpathway of conversion of glucose to acetyl CoA and entry into the TCA cycle  | 0.00809 | 48   | 10 (21.3%)  | 0.096  | HumanCyc     |
| formaldehyde oxidation                                                            | 0.00813 | 2    | 2 (100.0%)  | 0.096  | HumanCyc     |
| Abasic sugar-phosphate removal via the single-nucleotide replacement pathway      | 0.00813 | 2    | 2 (100.0%)  | 0.096  | Reactome     |
| Insulin effects increased synthesis of Xylulose-5-Phosphate                       | 0.00813 | 2    | 2 (100.0%)  | 0.096  | Reactome     |
| GLI3 is processed to GLI3R by the proteasome                                      | 0.00824 | 15   | 5 (33.3%)   | 0.096  | Reactome     |
| Degradation of GLI2 by the proteasome                                             | 0.00824 | 15   | 5 (33.3%)   | 0.096  | Reactome     |
| Degradation of GLI1 by the proteasome                                             | 0.00824 | 16   | 5 (33.3%)   | 0.096  | Reactome     |
| Formation of a pool of free 40S subunits                                          | 0.00851 | 115  | 18 (16.5%)  | 0.0986 | Reactome     |
| Signaling by Receptor Tyrosine Kinases                                            | 0.00868 | 423  | 53 (12.5%)  | 0.1    | Reactome     |
| Mono-unsaturated fatty acid beta-oxidation                                        | 0.00883 | 21   | 6 (28.6%)   | 0.101  | EHMN         |
| Folding of actin by CCT/TriC                                                      | 0.00888 | 10   | 4 (40.0%)   | 0.102  | Reactome     |
| Class I MHC mediated antigen processing & presentation                            | 0.00901 | 324  | 42 (13.1%)  | 0.102  | Reactome     |
| Intra-Golgi and retrograde Golgi-to-ER traffic                                    | 0.00905 | 186  | 27 (14.5%)  | 0.102  | Reactome     |
| Regulation of insulin secretion                                                   | 0.00905 | 70   | 13 (18.6%)  | 0.102  | Reactome     |
| AndrogenReceptor                                                                  | 0.00907 | 143  | 22 (15.4%)  | 0.102  | NetPath      |
| Translation initiation complex formation                                          | 0.00975 | 68   | 12 (19.0%)  | 0.109  | Reactome     |
| Ribosomal scanning and start codon recognition                                    | 0.00975 | 68   | 12 (19.0%)  | 0.109  | Reactome     |

**Supplemental Table 9: Sequences of oligonucleotides used for real time PCR.**

| <b>Gene name</b> | <b>Accession number</b> | <b>Forward sequence (5'-3')</b> | <b>Reverse sequence (5'-3')</b> |
|------------------|-------------------------|---------------------------------|---------------------------------|
| PCNA             | NM_182649.2             | CAAGTAATGTCGATAAAGAGGAGG        | GTGTCACCGTTGAAGAGAGTGG          |
| NGN3             | NM_020999.4             | CCTAAGAGCGAGTTGGCACTGA          | AGTGCCGAGTTGAGGTTGTGCA          |
| PDX1             | NM_000209.4             | GAAGTCTACCAAAGCTCACGCG          | GGAACTCCTTCTCCAGCTCTAG          |
| NKX2.2           | NM_002509.4             | CCTTCTACGACAGCAGCGACAA          | ACTTGGAGCTTGAGTCCTGAGG          |
| PAX6             | NM_001368894.2          | CTGAGGAATCAGAGAAGACAGGC         | ATGGAGCCAGATGTGAAGGAGG          |
| SCLY             | NM_016510.7             | ACTTCCTCGGTGGAACACGACT          | ATGATGGTCACGAGGCGTGTGG          |
| SRPRA            | NM_003139.4             | TCGTCACCTTCTGCGGCGTTAA          | CCAGCACGAAATGTATCACAGGC         |
| SEC61A2          | NM_018144.4             | TGCCACCAACATCTGTGAGACC          | CCTCCCGTAAAGCTCGGACTTT          |
| TBP              | NM_003194.5             | TGTATCCACAGTGAATCTTGTTG         | GGTTCGTGGCTCTTATCCTC            |
